# Supplementary material for: Cystatin C is glucocorticoid responsive, directs recruitment of Trem2+ macrophages, and predicts failure of cancer immunotherapy
Source: PubMed Central journal article supplement — Cell Genom. 2023 Jun 23;3(8):100347. doi: 10.1016/j.xgen.2023.100347 (PMC10435381; doi:10.1016/j.xgen.2023.100347), 2023-06-23
Supplement: mmc4.pdf [file mmc4.pdf]

# Cystatin C is glucocorticoid responsive, directs recruitment of Trem2+ macrophages, and predicts failure of cancer immunotherapy

## Graphical abstract

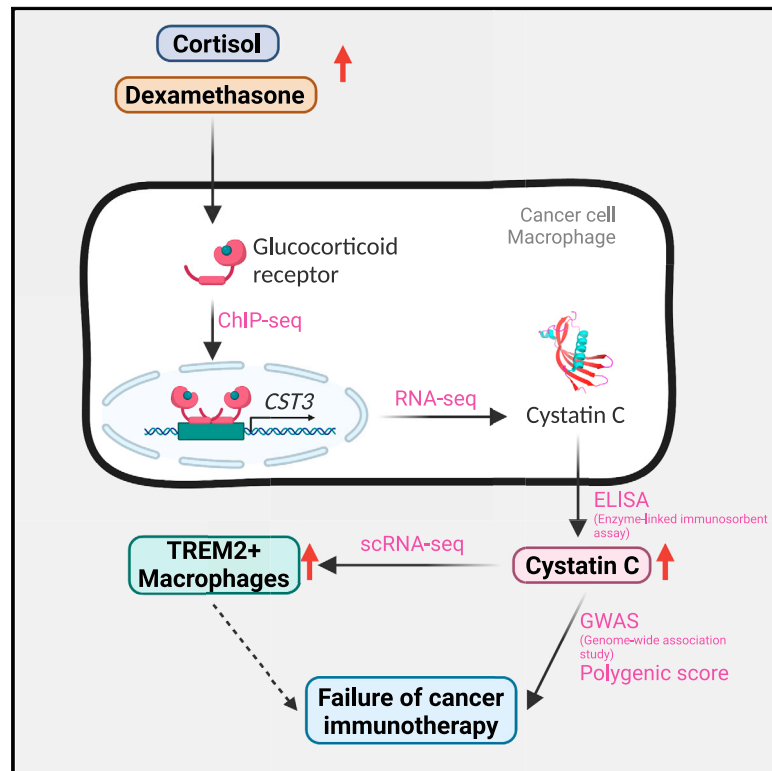

## Authors

Sam O. Kleeman, Tuba Mansoor Thakir, Breanna Demestichas, ..., Brian R. Walker, Hannah V. Meyer, Tobias Janowitz

## Correspondence

hmeyer@cshl.edu (H.V.M.), janowitz@cshl.edu (T.J.)

## In brief

Kleeman et al. reveal a connection between cystatin C, a blood marker often used to measure kidney function, and glucocorticoid signaling. The authors further demonstrate that cystatin C plays a role in immunosuppression and failure of cancer immunotherapy. This discovery may open new avenues for combination cancer immunotherapy targeting.

## Highlights

- Glucocorticoids are linked to the systemic regulation of cystatin C (CyC)
- Elevated CyC predicts higher mortality rates
- CyC impacts tumor growth and Trem2+ macrophage recruitment
- CyC production polygenic score predicts immunotherapy failure

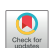

## Article

# Cystatin C is glucocorticoid responsive, directs recruitment of Trem2+ macrophages, and predicts failure of cancer immunotherapy

Sam O. Kleeman,<sup>1</sup> Tuba Mansoor Thakir,<sup>1,18</sup> Breanna Demestichas,<sup>1,18</sup> Nicholas Mourikis,<sup>1,18</sup> Dominik Loiero,<sup>2,18</sup> Miriam Ferrer,<sup>1</sup> Sean Bankier,<sup>3,4</sup> Yosef J.R.A. Riazat-Kesh,<sup>5</sup> Hassal Lee,<sup>1</sup> Dimitrios Chantzichristos,<sup>6,7</sup> Claire Regan,<sup>1</sup> Jonathan Preall,<sup>1</sup> Sarthak Sinha,<sup>8</sup> Nicole Rosin,<sup>8</sup> Bryan Yipp,<sup>9</sup> Luiz G.N. de Almeida,<sup>10</sup> Jeff Biernaskie,<sup>8,11</sup> Antoine Dufour,<sup>10</sup> Pinkus Tober-Lau,<sup>12</sup> Arno Ruusalepp,<sup>13</sup> Johan L.M. Bjorkegren,<sup>14</sup> Markus Ralsler,<sup>12</sup> Florian Kurth,<sup>12</sup> Vadim Demichev,<sup>12</sup> Todd Heywood,<sup>1</sup> Qing Gao,<sup>1</sup> Gudmundur Johannsson,<sup>6,7</sup> Viktor H. Koelzer,<sup>2,15</sup> Brian R. Walker,<sup>3,16</sup> Hannah V. Meyer,<sup>1,\*</sup> and Tobias Janowitz<sup>1,17,19,\*</sup>

<sup>1</sup>Cold Spring Harbor Laboratory, Cold Spring Harbor, NY, USA

<sup>2</sup>Department of Pathology and Molecular Pathology, University Hospital Zurich, University of Zurich, Zurich, Switzerland

<sup>3</sup>BHF Centre for Cardiovascular Science, Queen's Medical Research Institute, University of Edinburgh, Edinburgh, UK

<sup>4</sup>Computational Biology Unit, Department of Informatics, University of Bergen, Bergen, Norway

<sup>5</sup>Mount Sinai Hospital, New York, NY, USA

<sup>6</sup>Department of Internal Medicine and Clinical Nutrition, Institute of Medicine at Sahlgrenska Academy, University of Gothenburg, Gothenburg, Sweden

<sup>7</sup>Department of Endocrinology Diabetes and Metabolism, Sahlgrenska University Hospital, Gothenburg, Sweden

<sup>8</sup>Department of Comparative Biology and Experimental Medicine, Faculty of Veterinary Medicine, University of Calgary, Calgary, AB, Canada

<sup>9</sup>Department of Critical Care Medicine, Cumming School of Medicine, University of Calgary, Calgary, AB, Canada

<sup>10</sup>Department of Biochemistry and Molecular Biology and Physiology and Pharmacology, University of Calgary, Calgary, AB, Canada

<sup>11</sup>Department of Surgery, Cumming School of Medicine, University of Calgary, Calgary, AB, Canada

<sup>12</sup>Charité - Universitätsmedizin Berlin, Berlin, Germany

<sup>13</sup>Department of Cardiac Surgery, Tartu University Hospital, Tartu, Estonia

<sup>14</sup>Department of Genetics & Genomic Sciences, Institute of Genomics and Multiscale Biology, Icahn School of Medicine at Mount Sinai, New York, NY, USA

<sup>15</sup>Department of Oncology and Nuffield Department of Medicine, University of Oxford, Oxford, UK

<sup>16</sup>Translational & Clinical Research Institute, Newcastle University, Newcastle upon Tyne, UK

<sup>17</sup>Cancer Institute, Northwell Health, New Hyde Park, NY, USA

<sup>18</sup>These authors contributed equally

<sup>19</sup>Lead contact

\*Correspondence: [hmeyer@cshl.edu](mailto:hmeyer@cshl.edu) (H.V.M.), [janowitz@cshl.edu](mailto:janowitz@cshl.edu) (T.J.)

<https://doi.org/10.1016/j.xgen.2023.100347>

## SUMMARY

Cystatin C (CyC), a secreted cysteine protease inhibitor, has unclear biological functions. Many patients exhibit elevated plasma CyC levels, particularly during glucocorticoid (GC) treatment. This study links GCs with CyC's systemic regulation by utilizing genome-wide association and structural equation modeling to determine CyC production genetics in the UK Biobank. Both CyC production and a polygenic score (PGS) capturing predisposition to CyC production were associated with increased all-cause and cancer-specific mortality. We found that the GC receptor directly targets CyC, leading to GC-responsive CyC secretion in macrophages and cancer cells. CyC-knockout tumors displayed significantly reduced growth and diminished recruitment of TREM2+ macrophages, which have been connected to cancer immunotherapy failure. Furthermore, the CyC-production PGS predicted checkpoint immunotherapy failure in 685 patients with metastatic cancer from combined clinical trial cohorts. In conclusion, CyC may act as a GC effector pathway via TREM2+ macrophage recruitment and may be a potential target for combination cancer immunotherapy.

## INTRODUCTION

Multilevel phenotyping paired with quantitative models can direct discovery of the molecular determinants of complex biomedically relevant phenotypes such as organ function. Previ-

ously, we developed a metabolite-based model for the accurate estimation of kidney filtration function, defined as the estimated glomerular filtration rate (eGFR), in patients with cancer.<sup>1,2</sup> Like others before, we used creatinine,<sup>3</sup> a breakdown and metabolic end product of muscle creatine metabolism that is renally

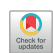

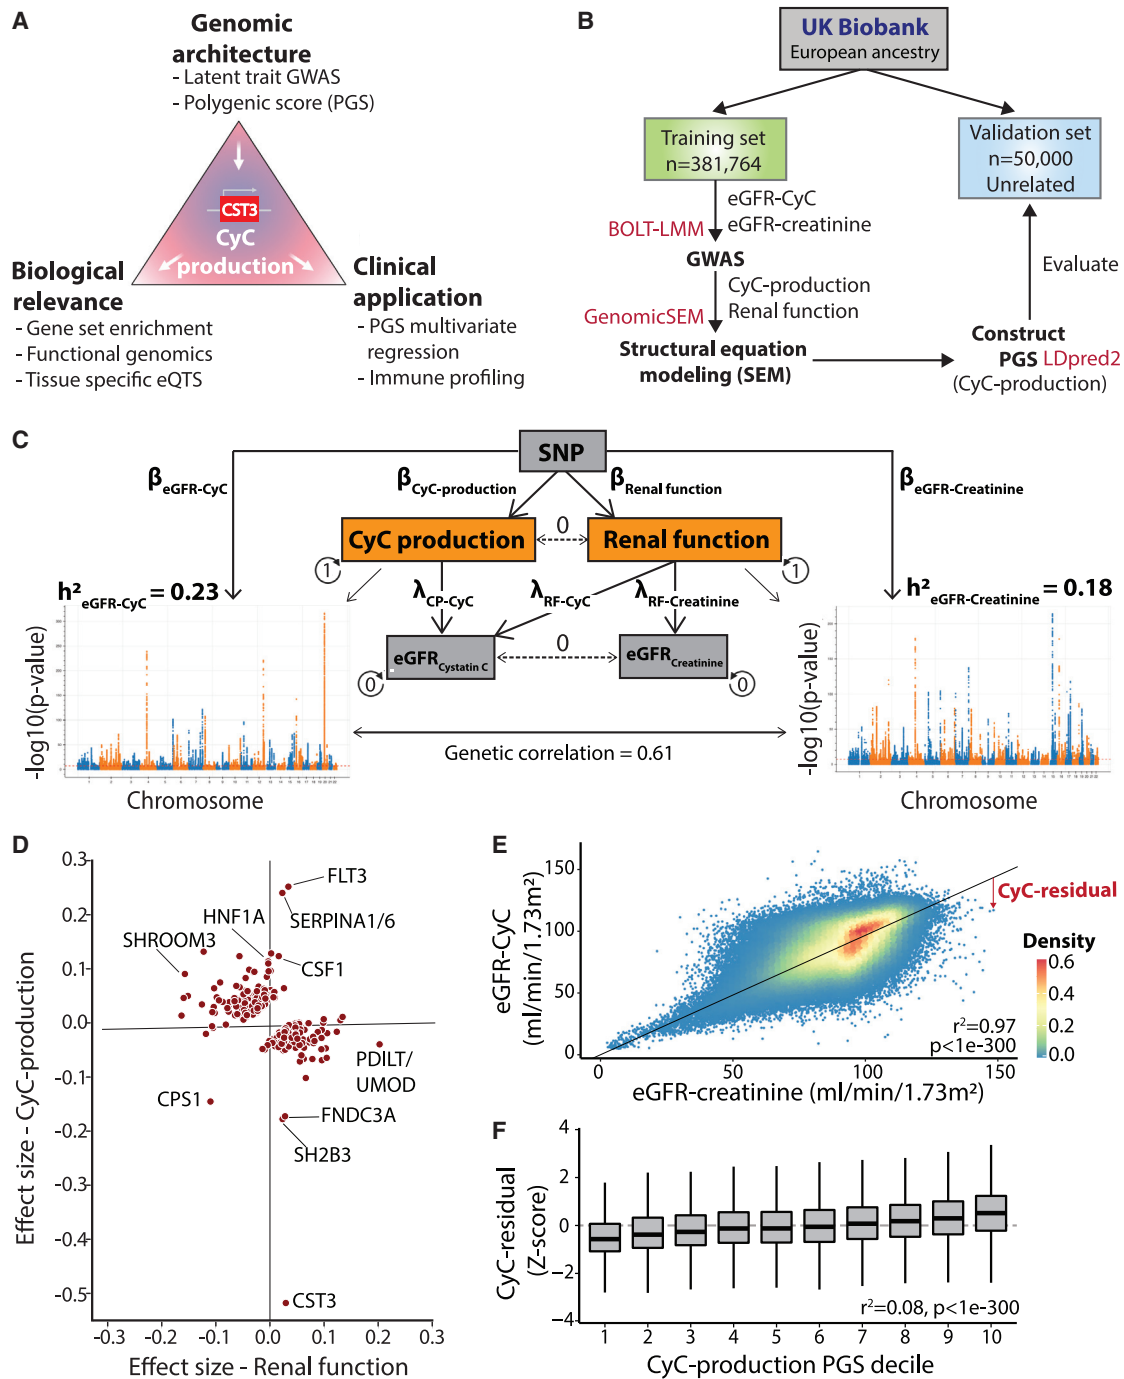

**Figure 1. Genomic architecture of cystatin C production**

(A) Schematic of study plan. The analysis of CyC-production latent trait in UK Biobank (UKB) is leveraged to determine the biological and clinical relevance of CyC. (B) Consort diagram and summary of UKB genome-wide association analysis strategy in the European ancestry population. The software packages utilized for each step are displayed in red.

(C) Structural equation model to estimate latent traits of CyC production and renal function. The model schematic, heritability ( $h^2$ ) of eGFR-creatinine and eGFR-CyC, and their genetic correlations derived from LD score regression are shown. Circular arrows refer to variance of each component, and dashed lines refer to covariance between components. RF, renal function.

(D) Latent trait effect sizes (CyC production and renal function) for single-nucleotide polymorphisms (SNPs) corresponding to each clumped locus in eGFR-CyC summary. Gene names are annotated per OpenTargets V2G pipeline.

(legend continued on next page)

excreted,<sup>4</sup> as a predictor variable. In non-cancer patients, creatinine use has been compared with use of cystatin C (CyC; gene name *CST3*),<sup>5</sup> a secreted, paracrine cysteine protease inhibitor.<sup>1,6</sup> Serum levels of both molecules depend on latent (unmeasured) components, including their production (synthesis and secretion) and the GFR. While creatinine production is well characterized and relates to muscle mass and diet,<sup>7</sup> CyC production is poorly defined.<sup>8</sup>

There are multiple indications that CyC production is likely systemically regulated. Patients who have had an organ transplant tend to have higher serum CyC levels for a given measured GFR.<sup>9</sup> These patients are routinely prescribed exogenous glucocorticoids (GCs), such as prednisolone or dexamethasone, as part of their immunosuppressive regimen.<sup>10</sup> Paired analyses demonstrated that exogenous GCs increase CyC production,<sup>11</sup> an effect also observed in patients with excess endogenous GC production (Cushing's syndrome).<sup>12</sup> Moreover, CyC production is increased in diseases that induce GC elevations, including viral infection,<sup>6</sup> inflammatory disease,<sup>8</sup> and cancer.<sup>13–17</sup> This positive association between GC exposure and CyC production has been recapitulated experimentally *in vitro*,<sup>18</sup> *in vivo*,<sup>19</sup> and in patients.<sup>11,20,21</sup>

Cortisol, the endogenous GC in humans, is produced by the adrenal gland<sup>22</sup> in a circadian rhythm peaking in the early morning.<sup>23</sup> Through action on the cytosolic GC receptor (GR), GCs profoundly modulate the cellular transcriptional landscape,<sup>24</sup> affecting up to 20% of all genes<sup>25</sup> and driving systemic reprogramming of metabolism and immunity.<sup>26</sup> GCs are therapeutically employed as immunosuppressors across a wide range of autoimmune and inflammatory diseases<sup>27</sup> and to mitigate immune-mediated damage to normal organ systems, a common and potentially severe side effect of T cell activation by checkpoint immunotherapy (CPI) in cancer.<sup>28</sup> However, *in vivo* models of cancer also suggests that even low doses of GCs can impair the efficacy of CPI<sup>29,30</sup> and suppress anti-tumor immunity,<sup>30</sup> leading to enhanced metastasis and reduced survival.<sup>31</sup> This has remained difficult to investigate in patients with cancer due to confounding by performance status and comorbidities,<sup>32</sup> inconsistent CPI trial inclusion criteria,<sup>29</sup> and the difficulties in performing well-controlled trials in this context.

We hypothesized that, rather than being a passive marker of renal function, CyC is directly associated with disease states and that this association might be mediated by GC signaling. Here, to empirically investigate this question, we leverage the UK Biobank (UKB), a prospective population-based cohort comprising approximately 480,000 subjects who provided germline genetics, serum CyC, and serum creatinine. Using conventional genome-wide association studies (GWASs) for eGFR-CyC/eGFR-creatinine followed by structural equation modeling (SEM), we estimate single-nucleotide polymorphism (SNP)-level associations with the latent trait of CyC production. We charac-

terize patient-level predisposition to CyC production via construction of a polygenic score (PGS), which is validated in a held-out cohort. Through multimodal genomics, *in vitro*, *in vivo*, and experimental medicine approaches, we link CyC to GC signaling, recruitment of Trem2+ macrophages, and failure of cancer immunotherapy.

## RESULTS

### Genomic architecture of CyC production

To investigate the genomic architecture of CyC production (Figure 1A), we first performed a discovery GWAS for eGFR-CyC and eGFR-creatinine (eGFR-Cr) in 381,764 European subjects in the UKB, using linear mixed models to account for population stratification and cryptic relatedness. We randomly selected 50,000 unrelated subjects from the overall UKB European population and excluded their data from the GWAS to enable later validation analyses (Figure 1B). Using linkage disequilibrium (LD) score regression, we identified a strong genetic correlation ( $r^2 = 0.61$ ) between eGFR-CyC and eGFR-Cr, consistent with both traits sharing a common factor that reflects renal filtration function. We reasoned that the genetic variance in eGFR-CyC that was not explained by this common factor represented the latent trait of CyC-production given that the CyC plasma level is a function of both CyC excretion in the kidney and its cellular production. Thus, we estimated the SNP-level effects on CyC production and renal function by constructing a SEM (Figures 1C, S1A, and S1B) implemented in Genomic-SEM,<sup>33</sup> assuming no covariance between CyC production and renal function. Concomitantly, loci known to directly regulate renal function such as *SHROOM3*<sup>34</sup> and *UMOD*<sup>35</sup> were predominantly associated with the renal function latent trait, while the locus coding for CyC (*CST3*) was predominantly associated with the CyC-production latent trait (Figure 1D). Other loci associated with CyC production, such as *SH2B3*<sup>36</sup> and *FLT3*,<sup>37</sup> identify components of immune cell signaling cascades and are strongly associated with autoimmune disease. The index SNP at the *SH2B3* locus is a missense variant (R262W) and exhibits a markedly larger effect size than would be expected for its allele frequency (minor allele fraction = 0.48; Figure S1C), consistent with evidence that this variant is under active positive selection.<sup>38</sup> The *CPS1* locus, coding for carbamoyl-phosphate synthase 1, notably had divergent effects on renal function and CyC-production, probably reflecting its independent roles in creatine metabolism<sup>39</sup> and immune signaling.<sup>40</sup> We next performed tissue-specific partitioned heritability analysis using gene expression and chromatin accessibility datasets (including Genotype-Tissue Expression [GTEx]<sup>41</sup> and Roadmap Epigenomics Project<sup>42</sup>). This confirmed enrichment of heritability of the renal function rather than the CyC-production component of CyC levels in kidney tissues (Figures S1D and S1E). This analysis also demonstrated enriched heritability for the renal function trait in liver tissues, in

(E) Linear model of eGFR-CyC as a function of eGFR-creatinine across all paired blood samples in UKB, including sex as a covariate. The deviation of the eGFR-CyC from the linear fit as indicated by the red arrow is defined as the CyC residual, a surrogate for CyC production. p value refers to Pearson correlation test. (F) Correlation of CyC residual with CyC-production polygenic score (PGS). The continuous PGS has been converted into deciles (1 = lowest, 10 = highest PGS). Only data from the independent validation set (see B) were used. Boxplots show median (central line) with interquartile range (IQR; box) and extrema (whiskers at  $1.5 \times$  IQR). p value refers to Pearson correlation test.



keeping with coupled hepatic and kidney function, observed clinically as hepatorenal syndrome.<sup>43</sup>

Using the discovery dataset, we captured the polygenic architecture of CyC production by deriving a PGS, implemented in LDpred2<sup>44</sup> using HapMap3 variants, that could be reliably imputed in all UKB, The Cancer Genome Atlas (TCGA), and GTEx cohorts (Figure S1F; supplemental information). To maximize portability to clinical sequencing cohorts where only exome sequencing is available, we derived a second PGS from HapMap3 variants that could be reliably imputed from exome sequencing data (Figure S1G). To validate both PGSs with the data from the 50,000 unrelated European patients (Figure 1B), it was necessary to define an independent, measurable patient-level estimate for CyC production. This is possible because the discordance between eGFR-CyC and eGFR-Cr approximates CyC production. Therefore, we modeled eGFR-CyC as a function of eGFR-Cr and sex and computed the residual (termed CyC residual; Figure 1E), a proxy of CyC production. As CyC residual is estimated from blood-protein levels, it is more likely to be confounded (for example by exogenous steroid treatment) than the germline-derived CyC production PGS. However, it can be conveniently scored using routinely available blood tests in the absence of germline genotypes. Using CyC residual, we confirmed that the genome-wide CyC-production PGS had predictive power in the validation cohort ( $r^2 = 0.08$ ,  $p < 1e-300$ , Pearson correlation test; Figure 1F). As expected, predictive performance was reduced for the exome-wide PGS in the validation cohort ( $r^2 = 0.04$ ,  $p < 1e-300$ , Pearson correlation test).

To investigate the *trans*-ancestral portability of the genome-wide CyC-production PGS, we measured performance versus CyC residual in African (AFR;  $n = 8,152$ ) and Central and South Asian (CSA,  $n = 9,845$ ) genetic ancestry groups in the UKB. We observed poor *trans*-ancestral portability of this PGS in these ancestry groups (Figures S2A and S2B). In order to derive a PGS in each non-European (EUR) population, we performed GWAS and SEM as described above (Figure 1B) in these two ancestry groups, but these analyses were underpowered (Figures S2C and S2D). While the genetic correlation between eGFR-CyC and eGFR-Cr in CSA subjects ( $r^2 = 0.65$ ) was comparable to EUR subjects ( $r^2 = 0.61$ ), genetic correlation was substantially diminished in AFR subjects ( $r^2 = 0.18$ ). This indicates that eGFR-Cr and/or eGFR-Cy correlate weakly with true GFR in the AFR population, thus providing empirical genetic evidence to the observation that eGFR models have reduced performance in individuals self-identifying as Black or African American.<sup>45</sup>

### CyC production is associated with accelerated onset of disease

We hypothesized that these quantitative measures of CyC production (CyC-residual and CyC-production PGSs) could be used to investigate its prognostic potential. Therefore, we used multivariate Cox regression to estimate the effect of the blood test-derived CyC residual on all-cause mortality, adjusted for relevant patient covariates known to predict mortality.<sup>46–48</sup> We found that CyC residual was associated with significantly increased all-cause mortality (hazard ratio [HR] = 1.56,  $p < 1e-16$ ; Figure 2A). We considered that CyC residual has

the potential to be confounded by a multitude of environmental factors, including but not limited to inflammation and exogenous GC treatment. To mitigate this, we investigated whether the germline predisposition to CyC production, estimated as the CyC-production PGS, could predict lifespan in our UKB EUR validation set (Figure 1B). Using multi-variate Cox regression adjusted for sex, year of birth, and principal components capturing genetic ancestry, we found that the CyC-production PGS was associated with significantly reduced lifespan of UKB subjects ( $p = 0.00013$ ), as well as their two parents ( $p < 1e-16$ ; Figure 2B).

We considered that increased all-cause mortality might be explained by either earlier onset of specific disease states or reduced prognosis following disease diagnosis. To investigate the former, we performed a phenome-wide association analysis (PheWAS) in the UKB validation set to identify time-to-event phenotypes ( $n = 694$ ) that were significantly associated with CyC production using multivariate Cox regression (Figure 2C). We identified positive associations meeting phenome-wide significance ( $p < 1e-5$ ) between the CyC-production PGS and multiple diseases linked to metabolic syndrome, including type 2 diabetes, obesity, hypertension, and ischemic heart disease. To investigate how CyC production could modulate disease prognosis, and as elevated plasma CyC is associated with cancer,<sup>13</sup> we examined whether the blood test-derived CyC-residual and CyC-production PGSs were independent predictors of adverse outcomes in patients with cancer. Using UKB patients diagnosed with cancer since 2000 and with cancer-specific mortality, we found that CyC residual is an independent predictor of increased cancer-specific mortality in UKB (HR = 1.22,  $p < 1e-16$ , Cox regression; Figure 2A), consistent with the findings of others.<sup>17</sup> For orthogonal validation, we performed multivariate Cox regression of cancer-specific mortality against CyC-production PGSs across 13 tumor groups in 2 independent cohorts (UKB validation set, TCGA EUR subjects). Both fixed and random effect meta-analyses in each independent cohort confirmed a significant positive association between CyC-production PGSs and cancer-specific mortality (Figures 2D and 2E). We noted that while there was variation in a single-cancer level, the overall effect size was concordant between the UKB and TCGA. Consistent with this, we have found that the CyC-production PGS is associated with increased odds of COVID-19 critical illness in four cohorts spanning EUR and AFR ancestry populations.<sup>49</sup> In summary, the association between CyC-production PGSs and reduced lifespan likely reflects a combination of earlier disease onset and reduced disease-specific survival and is consistent with evidence for elevated plasma CyC in patients with cancer.<sup>14</sup>

### CyC is a GC response gene *in vitro*

To better understand the mechanism by which CyC production could regulate disease incidence and prognosis, we reviewed the genetic loci most associated with CyC production in our GWAS summary statistics. The *SERPINA1/6* locus on chromosome 14 had one of the largest effect sizes for CyC production (Figures 1D and 3A) and is known to be associated with plasma cortisol,<sup>50</sup> implying the possibility of a link between cortisol and CyC. In a recent cortisol genome-wide meta-analysis, this signal

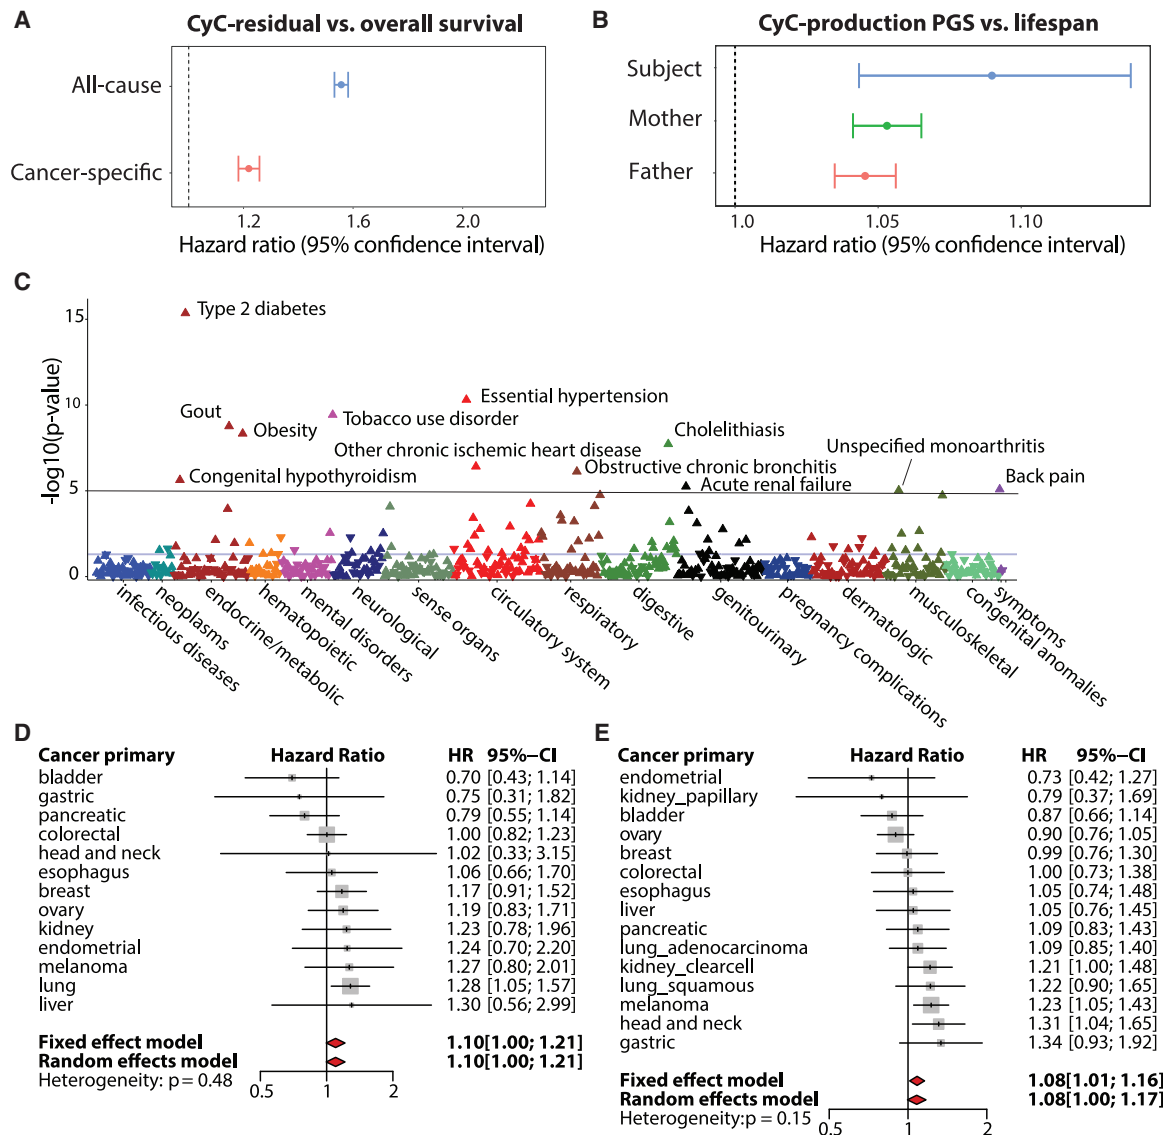

**Figure 2. CyC production is associated with multiple disease states and is prognostic in patients with cancer**

(A) Multivariate Cox regression to measure effect size for CyC residual on overall survival in UKB. Covariates included age, sex, body mass index (BMI), hemoglobin, C-reactive protein, eGFR-creatinine, and operation status (for cancer-specific subanalysis). Error bars indicate 95% confidence interval. (B) Multivariate Cox regression to measure effect size for CyC-production PGS on subject and parental lifespan in UKB validation cohort. Covariates included PC1-4, recruitment center, genotyping array, year of birth of subject, and sex of subject (if applicable). (C) Phenome-wide association (Cox regression) between CyC-production PGS and 694 time-to-event phenotypes in UKB validation cohort. Covariates included principal components 1-4 (PC1-4), year of birth, and sex. (D and E) Multivariate Cox regression to measure effect size for CyC-production PGS on disease-specific survival for specific cancers in (D) UKB validation cohort (cancers diagnosed since 2000,  $n = 3,954$ ) and (E) TCGA cohort ( $n = 4,368$ ). Covariates included PC1-4, age, sex, and a term reflecting whether the patient had curative surgery. Error bars indicate 95% confidence interval; gray squares indicate sample size.

was thought to be mediated by altered hepatic expression of *SERPINA6*,<sup>50</sup> which encodes cortisol-binding globulin (CBG). To determine if there was a shared common variant, we performed co-localization analysis.<sup>51</sup> We did not detect a shared causal variant (posterior probability =  $1.45e-15$ ), but *trans*-expression quantitative trait locus (*trans*-eQTL) analysis in the Stockholm Tartu Atherosclerosis Reverse Networks Engineering Task (STARNET)<sup>52</sup> cohort identified a single SNP (rs2749527) at

the *SERPINA1/6* locus that was associated with significantly reduced plasma cortisol ( $p = 1.75e-13$ , fixed effect meta-analysis) and significantly reduced *CST3* gene expression in visceral adipose fat ( $p = 0.0024$  in additive model,  $p = 9.21e-6$  in recessive model, Bonferroni-adjusted alpha level of 0.0025; Figure 3B). Visceral adipose fat is known to predominantly comprise adipocytes, endothelial cells, and macrophages.<sup>53</sup> We investigated the potential cellular mediators of this association in detail and

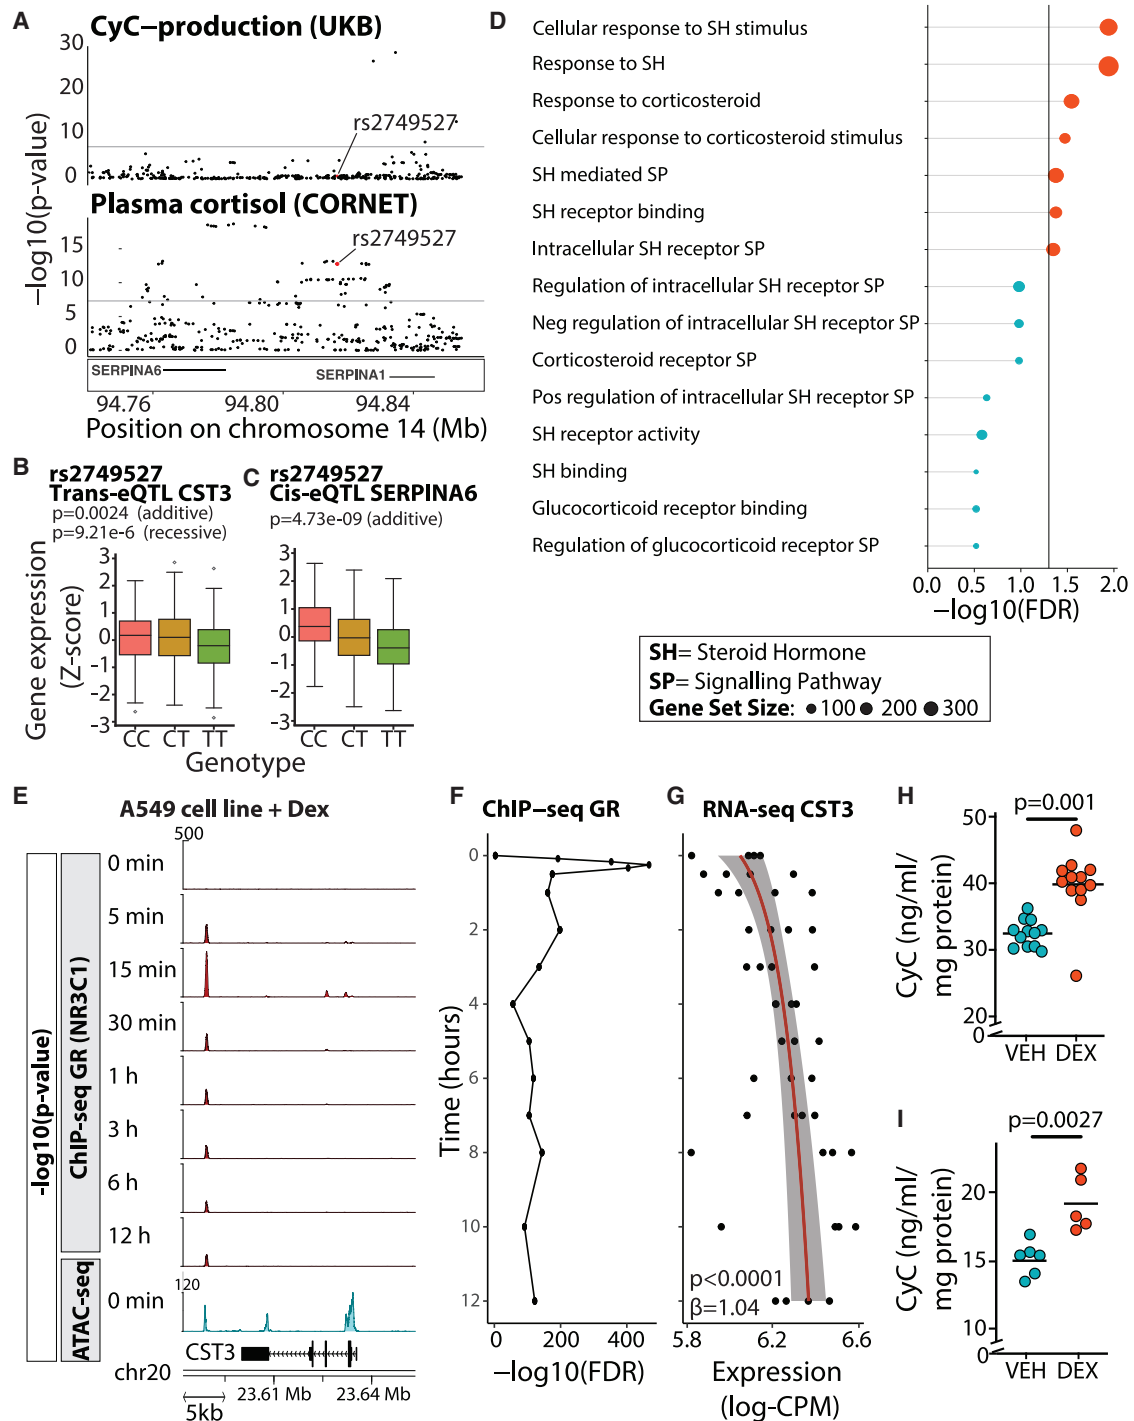

**Figure 3. CyC is a glucocorticoid response gene in vitro**

(A) Co-localization of summary statistics for CyC-production from UKB and plasma cortisol from CORNET Consortium at *SERPINA1/6* locus. rs2749527 variant is highlighted in red.

(B) Trans-eQTL analysis examining association between genetic instrument rs2749527 and *CST3* gene expression in visceral adipose fat (VAF) in STARNET cohort.

(C) Cis-eQTL association between rs2749527 and *SERPINA6* (encodes cortisol-binding globulin) in liver in STARNET cohort. p values for additive and recessive models are shown. See Figure S3 for replication analysis in GTEx.

(D) Gene set enrichment analysis (MAGMA) across CyC-production summary statistics (UKB) for steroid signaling-related gene sets.

(legend continued on next page)

discuss the results below. In addition to acting as a *trans*-eQTL in adipose tissue, rs2749527 is independently associated with significantly reduced liver *SERPINA6* expression in STARNET ( $p = 4.73e-9$ , additive model; Figure 3C) and GTEx ( $p = 0.004$ , additive model; Figures S3A–S3C) cohorts. As such, a single genetic instrument connects CBG, plasma cortisol, and CyC, thus providing genetic evidence for a direct link between GCs and CyC.

To further examine the link between GCs and CyC, we mapped each SNP meeting genome-wide significance to overlapping genes (defined by transcriptional start and end sites) and performed gene set enrichment analysis for gene sets relating to GC signaling. This analysis identified significant enrichment of 7/15 GC signaling gene sets from the Gene Ontology Resource (Figure 3D); thus, we hypothesized that *CST3* might be a direct transcriptional target of GR (gene name *NR3C1*). Using functional genomics data derived from the ENCODE project, including chromatin immunoprecipitation sequencing (ChIP-seq) for GR and assay for transposase-accessible chromatin using sequencing (ATAC-seq) data in the A549 cell line treated with dexamethasone, we identified dexamethasone-induced recruitment of GR to an accessible downstream enhancer element at the *CST3* locus (Figures 3E and 3F). In the same experiment, dexamethasone significantly increased *CST3* gene expression over time ( $p < 0.0001$ , linear model; Figure 3G). We next investigated whether, and on what timescale, the transcriptional induction of *CST3* by dexamethasone results in increased cellular secretion of CyC, which would cause increased tissue and circulating CyC levels. We first repeated the ENCODE experimental protocol using A549 cells and found that extracellular CyC concentration was significantly increased after 18 h of dexamethasone treatment compared with 0 h (Figure S3D). We also detected increased extracellular CyC concentration 18 h after treatment with dexamethasone compared with vehicle control in A549 cells (Figure 3H) and HeLa cells (Figure 3I).

### CyC is secreted in healthy individuals by monocytes in a GC-independent manner

CyC has been validated as a marker of renal function in multiple large clinical cohorts<sup>54</sup> comprising patients without acute disease. Considering that it is dynamically regulated in disease states such as cancer,<sup>13</sup> we hypothesized that GC-inducible expression of CyC would operate in a context-dependent manner. To investigate this hypothesis, it was first necessary to characterize the dominant source of secreted CyC in health. At first glance, *CST3* gene expression was relatively consistent across all tissues examined as part of the GTEx project (GTEx Portal), but we reasoned that tissues that predominantly secrete

CyC would exhibit a significant positive correlation between CyC-production PGSs and *CST3* gene expression. Using expression quantitative trait score (eQTS) analysis, we detected a significant positive correlation in spleen tissues ( $n = 171$ ; Figure 4A). In support of this, we identified circadian rhythmicity from cosinor regression of spleen *CST3* gene expression against time of death, which was attenuated compared with the canonical, circadian-rhythm-dependent GC target *FKBP5* (amplitude = 0.060 versus 0.24; Figure S4A). To understand which cell types might be driving this signal, we examined available single-cell RNA sequencing (scRNA-seq) data from human spleen.<sup>55</sup> This showed that only myeloid-derived cell populations (dendritic cells, macrophages, and monocytes) expressed *CST3* (Figure 4B). We confirmed myeloid-specific *CST3* expression in peripheral blood mononuclear cells (PBMCs) with scRNA-seq<sup>56</sup> (Figure 4C) and across multiple scRNA-seq datasets harmonized as part of the Human Protein Atlas<sup>57</sup> (Figure 4D). As additional validation supporting the role of myeloid-derived cells, and specifically monocytes, as a dominant contributor to plasma CyC levels, we found a significant positive correlation between blood monocyte counts and CyC residual in the UKB cohort (Figure S4B; multivariate regression), and two-sample Mendelian randomization using blood-derived *CST3* eQTLs (eQTLGen<sup>58</sup>) as exposure identified a highly significant positive association with CyC production ( $p = 6.13e-77$ ; Figure 4E). With the limited circadian variability in *CST3* gene expression in the spleen (Figure S4A), we hypothesized that monocytes would constitutively express CyC without GC inducibility. We confirmed this hypothesis in monocyte-like THP-1 cells by RNA (Figure 4F) and protein level (Figure 4G). As orthogonal verification, we detected constitutive expression of CyC unaffected by GC agonism in primary human monocytes ( $p = 0.39$ , two-sided t test; Figure S4C). Consistent with these findings, high-dose dexamethasone treatment did not elevate plasma CyC levels in healthy BALB/c (Figure 4H) and C57BL/6J (Figure 4I) mice, nor did near-physiological hydrocortisone treatment affect Cr-normalized CyC levels (ratio of eGFR-Cr to eGFR-CyC, termed C2 ratio) in patients with primary adrenal insufficiency<sup>59</sup> (Figure 4J). Altogether, these findings indicate that CyC production is relatively constant in health and, in this context, does not significantly increase in response to GC agonism, helping to explain the validated utility of CyC as a marker of renal function in patients without acute illness.<sup>54</sup>

### CyC secretion is dynamically and GC-dependently regulated in disease states

Inflammation is characterized by the recruitment of monocytes to diseased tissues, where they differentiate into macrophages.<sup>61</sup>

(E) Functional genomics in A549 cell line (ENCODE project) treated with 100 nM dexamethasone for 0 min to 12 h. ChIP-seq (for glucocorticoid receptor/NR3C1) and ATAC-seq (at 0 h) at *CST3* locus identifies a glucocorticoid-responsive and accessible distal enhancer element.

(F and G) Time course of (F) GR recruitment (at distal enhancer) and (G) *CST3* gene expression (log-CPM) following dexamethasone (DEX) treatment in A549 cells (ENCODE project). Trendline and shaded 95% confidence interval correspond to regression of gene expression as a function of log-time.

(H and I) Extracellular CyC concentration in (H) A549 cells and (I) HeLa cells normalized to cellular protein content after 18-h treatment with 100 nM DEX or vehicle (VEH) control. Each condition comprises at least 5 biological replicates; horizontal bars indicate mean extracellular CyC. p values correspond to two-sided t tests. See Figure S3 for timecourse.

(B and C) Boxplots show median (central line) with IQR (box) and extrema (whiskers at  $1.5 \times$  IQR). Outliers beyond  $1.5 \times$  IQR are shown as dots. SH, steroid hormone; SP, signaling pathway; VEH, vehicle; DEX, dexamethasone.

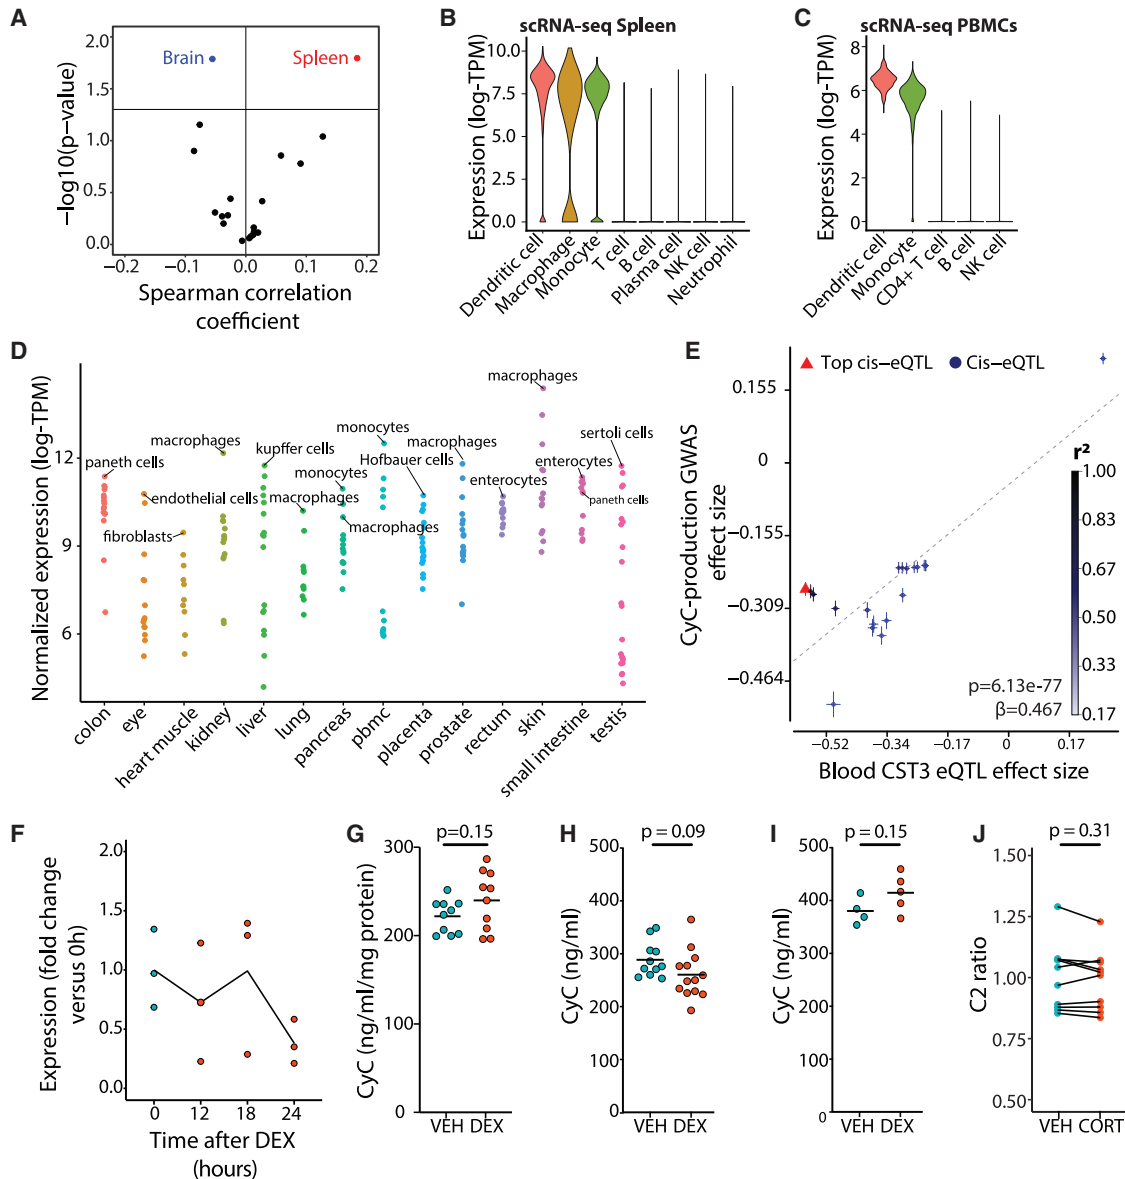

**Figure 4. CyC is predominantly produced by myeloid cells in health**

(A) Tissue-specific expression quantitative trait score (eQTS) analysis to identify tissues with significant correlation (Spearman coefficient) between CyC-production PGS and tissue-specific *CST3* gene expression in GTEx cohort. p values are uncorrected, as each correlation test is performed in a non-overlapping set of tissue-specific samples.

(B and C) Distribution of normalized single-cell *CST3* expression (log-transcripts per million [TPM]) in cell clusters isolated from (B) spleen and (C) peripheral blood mononuclear cells (PBMCs). Clusters defined by correlation to reference PBMC data.<sup>60</sup>

(D) Mean *CST3* gene expression (log-TPM) in each cell cluster from multiple tissue-specific single-cell RNA sequencing projects, harmonized by Human Protein Atlas. The top cell cluster and tissue-specific macrophage cell type (if not top cluster) by tissue is annotated.

(E) Two-sample Mendelian randomization using blood-specific *cis*-eQTLs for *CST3* (eQTLGen) as exposure and CyC-production latent trait GWAS as outcome. Error bars correspond to standard errors, and point color refers to linkage with top *cis*-eQTL.

(F and G) Non-significant ( $p > 0.05$ ) changes in (F) *CST3* gene expression (reverse transcription PCR) during 0- to 18-h DEX (100 nM) treatment and (G) extracellular CyC concentration in human THP-1 cells (monocyte-like) normalized to cellular protein content after 18-h treatment with DEX (100 nM) or VEH control.

(H and I) Each condition comprises 10 biological replicates. Plasma CyC concentration in healthy (H) BALB/cJ and (I) C57BL/6J mice treated with VEH or 20 mg/kg DEX.

(J) Creatinine-normalized plasma CyC (C2 ratio) in patients with primary adrenal insufficiency treated with placebo (VEH) or hydrocortisone (CORT) in a crossover experimental medicine study. The administered intravenous (i.v.) CORT dose was 0.03 mg/kg/h between 12 and 7 a.m. (the time point of sampling), achieving near-physiological GC exposure.

(G–J) p values refer to two-sided t tests. VEH, vehicle; DEX, dexamethasone.



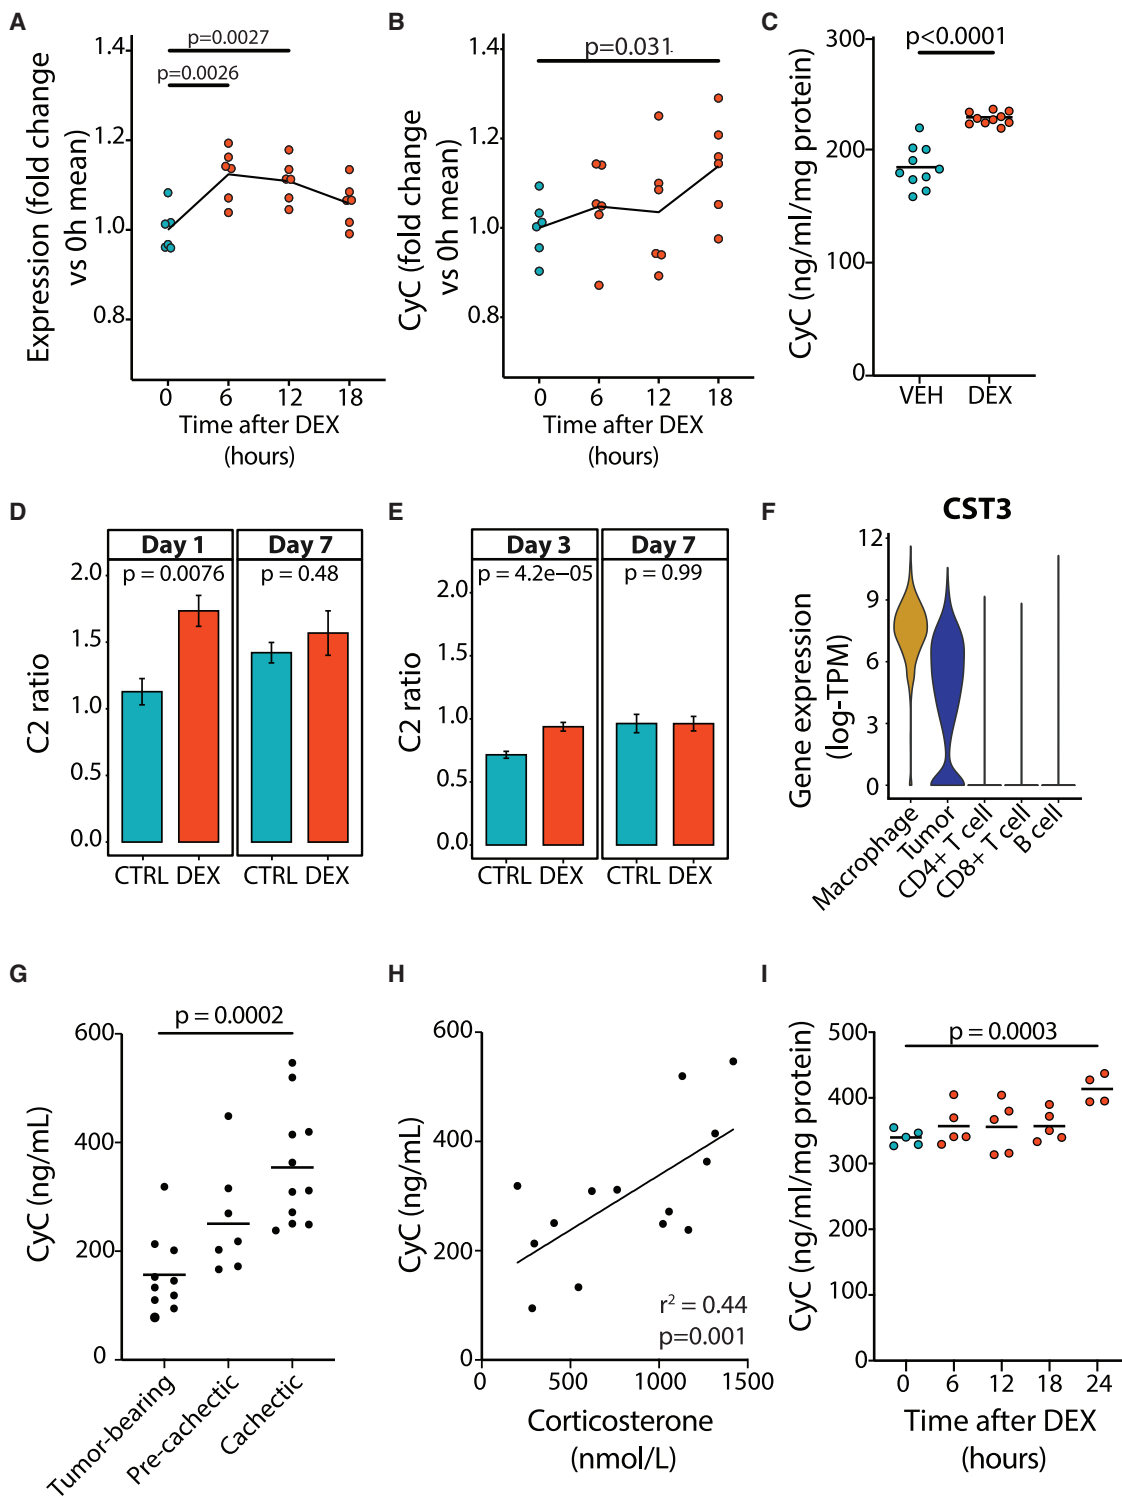

**Figure 5. CyC production is dynamically regulated in disease states**

(A and B) Significant ( $p < 0.05$ ) changes in paired (A) *CST3* gene expression (reverse transcription PCR) and (B) extracellular CyC concentration in PMA-treated human THP-1 cells (macrophage-like) normalized to cellular protein content during 0- to 18-h DEX (100 nM) treatment. There are 6 biological replicates per group. (C) Change in normalized extracellular CyC concentration in macrophage-like THP-1 cells after 18-h treatment with DEX (100 nM) or VEH control.

(legend continued on next page)

As GR is expressed in macrophages but not in monocytes,<sup>62</sup> we hypothesized that while monocytes have constitutive basal CyC production (Figures 4F and 4G), macrophages would secrete CyC in response to GC agonism. To investigate this question, we treated monocytic human THP-1 cells with the protein kinase C activator PMA (phorbol 12-myristate 13-acetate) to induce macrophage-like differentiation and measured *CST3* gene expression, total protein content, and extracellular CyC in each sample. Dexamethasone treatment of PMA-activated THP-1 cells significantly increased *CST3* gene expression at 6 h (Figure 5A), while extracellular CyC protein concentration did not increase until 18 h (Figure 5B), mirroring the results found in A549 and HeLa cells (Figures 3H and 3I). In addition, we detected that 18-h dexamethasone exposure induced extracellular CyC elevations in an independent experiment using macrophage-like cells (Figure 5C). We also verified GC-inducible secretion of CyC in primary human macrophages. Here, we experimentally differentiated monocytes into M1 and M2 macrophages and then treated cells with dexamethasone for 18 h. We measured significantly increased extracellular CyC protein in M2 macrophages ( $p = 0.05$ , two-sided t test) and increased CyC in M1 macrophages ( $p = 0.07$ , two-sided t test; Figures S4D and S4E). In contrast, GC treatment did not induce CyC in monocyte-derived immature and mature dendritic cells ( $p > 0.39$ , two-sided t test; Figures S4F–S4G). To investigate the GC–CyC connection in these cell types on a regulatory level, we analyzed established estimates of enhancer–gene pair activity<sup>63</sup> and found increased activation of the downstream enhancer element at the *CST3* locus (Figure S4H) in macrophage-like versus monocyte-like THP-1 cells (Figure S4I).

Severe COVID-19 infection is characterized by persistent lung inflammation associated with concomitant recruitment of monocyte-derived macrophages.<sup>65</sup> Until the release of the RECOVERY trial,<sup>66</sup> patients with severe COVID-19 were not routinely treated with GC agonists such as dexamethasone. As such, COVID-19 presents a unique opportunity to investigate the effect of dexamethasone on Cr-normalized CyC levels (C2 ratio). We collated plasma Cr and CyC measurements in two independent cohorts of patients (from Calgary, Canada,<sup>67</sup> and Berlin, Germany<sup>68</sup>). In each cohort, a subset of patients received standard of care (pre-RECOVERY trial) and a subset received standard of care plus dexamethasone from admission (post-RECOVERY trial). We identified significantly increased C2 ratios in dexamethasone-treated patients at early time points (day 1 or 3; Figures 5D and 5E) that normalized by day 7 after admission.

The findings that CyC is constitutively expressed by myeloid cells and that GC-responsive CyC secretion occurs in macro-

phages, but not monocytes, have the potential to explain our finding that rs2749527 is a *trans*-eQTL for *CST3* measured in visceral adipose fat (VAF) in STARNET but not GTEx ( $p = 0.77$ , additive model; Figure S3B). The STARNET study recruited patients with established coronary artery disease,<sup>52</sup> while the GTEx study is a relatively unselected cohort of deceased donors.<sup>41</sup> As metabolic syndrome is associated with significant macrophage accumulation in adipose tissue,<sup>69</sup> we hypothesized that STARNET patients would have significantly increased macrophage gene signatures in VAF compared with GTEx donors. Using CIBERSORTx<sup>70</sup> (absolute mode) analysis of RNA-seq data in each cohort, we identified highly significant enrichment of M2-like macrophages (demarcated by high expression of *CCL18*, *TREM2*, and *CLEC4A*) in STARNET versus GTEx ( $p = 3.03e-289$ , two-sided t test; Figure S5A). M2-like macrophages were by far the most abundant myeloid component in the STARNET VAF samples, suggesting that they are the cell type underlying the *trans*-eQTL signal. This finding both provides orthogonal validation for the role of macrophages in GC-responsive CyC secretion and illustrates the limitations of eQTL analysis using bulk RNA-seq data, as has been described previously.<sup>71</sup>

While we did not identify significant *CST3* gene expression in epithelial tissues in the GTEx and Human Protein Atlas datasets, we detected high and GC-inducible CyC expression in cancer cell lines (Figures 3H and 3I). This raises the possibility that cancer cells co-opt a phenotype normally exhibited by macrophages and ectopically express *CST3*. We reanalyzed melanoma scRNA-seq data from 12 patients and confirmed high *CST3* expression in the myeloid compartment and identified comparable ectopic *CST3* expression in the tumor compartment (Figure 5F). Consistent with elevated intratumoral GC levels,<sup>72</sup> expression of the canonical GC target *FKBP5* could be identified in all cell populations profiled in the tumor (Figure S5B), demonstrating that GC signaling is necessary but not sufficient for *CST3* expression. The murine colon-26 (C26) model of cancer progression is characterized by marked elevations in endogenous GC production during disease progression.<sup>30</sup> As has been demonstrated in human patients with cancer,<sup>14</sup> we hypothesized and subsequently confirmed that CyC levels would significantly increase during disease progression (Figure 5G) and that these increases would positively correlate with levels of the endogenous murine GC corticosterone (Figure 5H). Dexamethasone treatment of C26 cells *in vitro* was associated with significantly increased CyC secretion at 24 h (Figure 5I), suggesting that elevations in CyC during C26 cancer progression are at least in part mediated by GC-induced cancer cell-intrinsic CyC secretion. Altogether, these findings demonstrate that the capacity of

(D and E) Creatinine-normalized plasma CyC (C2 ratio) at specific time points with sufficient data in hospitalized COVID-19 patients treated with DEX or standard of care (control [CTRL]) as part of cohorts based in (D) Calgary, Canada, and (E) Charité Hospital, Germany. Day 1 in the Calgary, Canada, cohort refers to a time window of 72 h after admission to the ICU. Error bars indicate standard error of the mean.

(F) Single-cell *CST3* gene expression in each cell cluster in melanoma tumors ( $n = 12$ ) from Jerby-Anon et al.<sup>64</sup> Clusters defined by correlation to reference PBMC data,<sup>60</sup> with unclassified cells that exhibit detectable clonal copy-number variation classified as tumors.

(G) Plasma CyC concentration in BALBc mice after inoculation with colon-26 (C26) tumor cells. Cachexia is defined by >15% body weight loss, and pre-cachexia refers to 14 days after tumor inoculation; tumor bearing refers to day 7 after tumor inoculation.

(H) Significant positive correlation between plasma corticosterone and plasma CyC during tumor progression in C26 model.

(I) Extracellular CyC concentrations in C26 cells normalized to cellular protein content after 0-, 6-, 12-, 18-, or 24-h treatment with 100 nM DEX. Each time point comprises at least 4 biological replicates.  $p$  values refer to two-sided t tests. VEH, vehicle; DEX, dexamethasone.

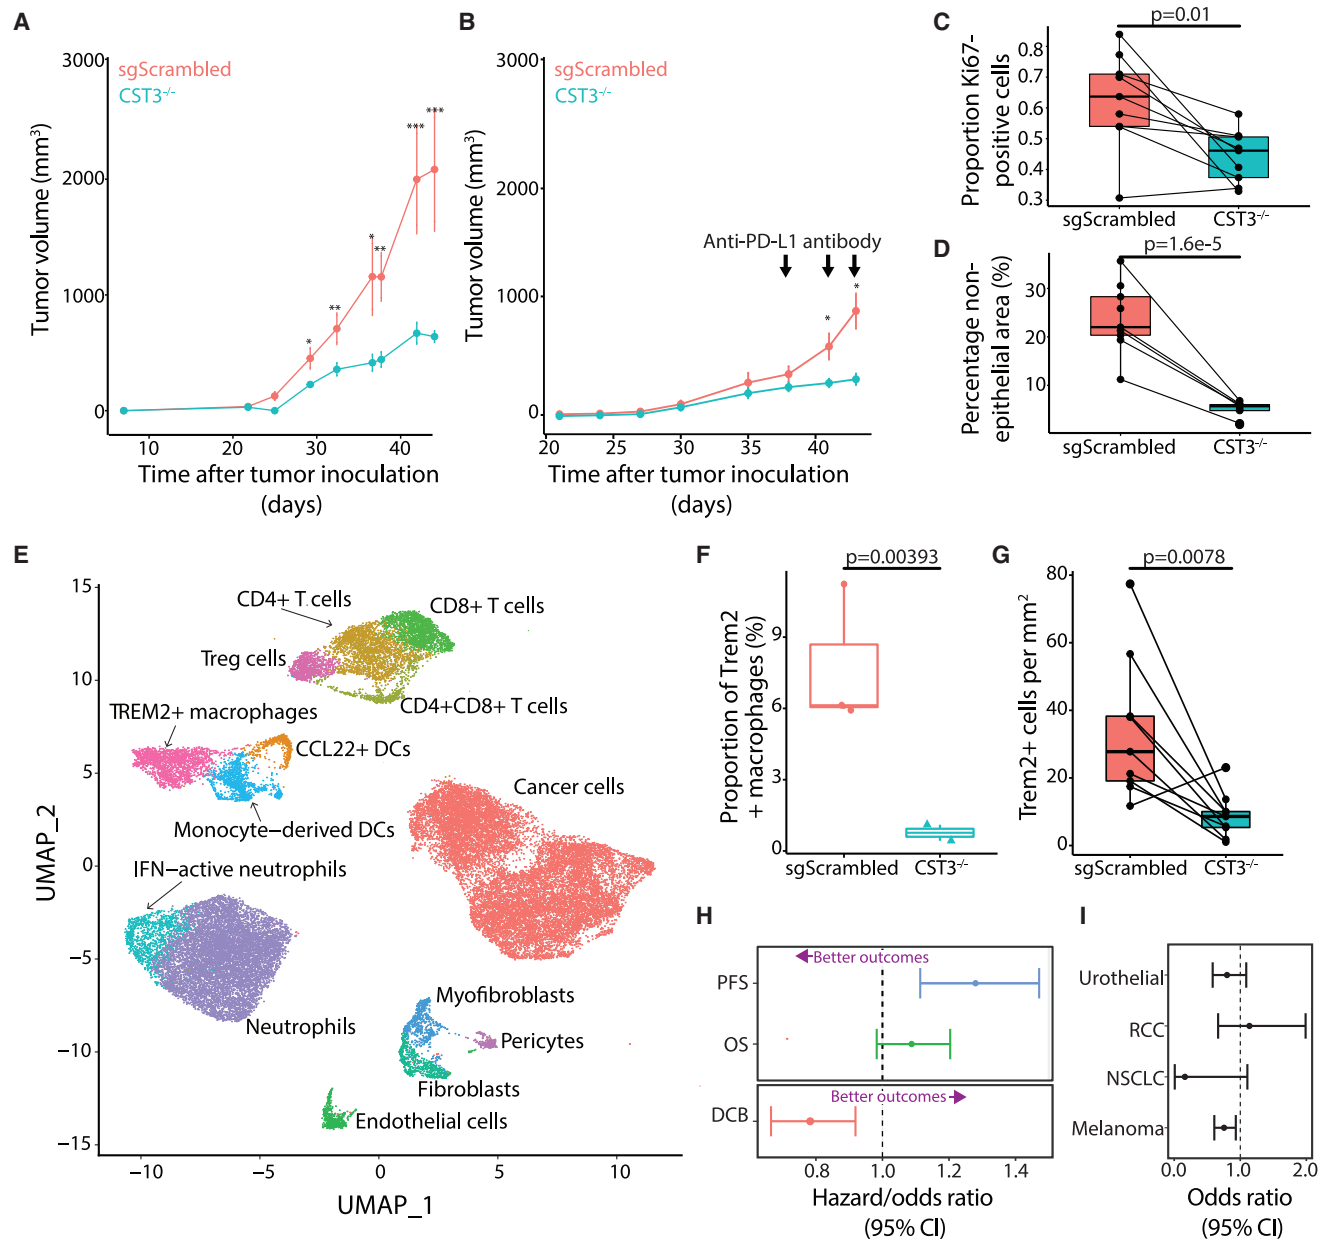

**Figure 6. CyC directs recruitment of TREM2+ macrophages and promotes failure of cancer immunotherapy**

(A) Tumor growth curves (mean and standard error of the mean) for single-flank sgScrambled (n = 8) and  $CST3^{-/-}$  (CST3 knockout [KO], n = 8) tumors; 100,000 cells were inoculated in right flank (cohort A).

(B) Tumor growth curves (mean and standard error of the mean) for biflank paired sgScrambled (n = 5) and  $CST3^{-/-}$  (n = 5) tumors; 50,000 cells were inoculated in both flanks (cohort C). Mice received three doses of anti-PD-L1 antibody. p values refer to paired two-sided t tests.

(C and D) Proliferation index (proportion of Ki67+ cells/total cells) (C) and proportion (D) of non-epithelial cells in histological sections from paired biflank sgScrambled and  $CST3^{-/-}$  tumors (pooled cohorts C and D). p values refer to paired two-sided t tests.

(E) Uniform manifold approximation and projection (UMAP) of 14,416 cells, annotated with cell type, from 4 tumor samples (2 sgScrambled, 2  $CST3^{-/-}$ ).

(F) Proportion of Trem2+ macrophages in sgScrambled and  $CST3^{-/-}$  tumors; p value is adjusted p value from linear model of logit-transformed proportions.

(G) Number of Trem2+ cells per mm<sup>2</sup> from digital image analysis of Trem2 immunohistochemistry in paired biflank sections from sgScrambled and  $CST3^{-/-}$  tumors. p value refers to paired two-sided t test.

(H) Multivariate (Cox and logistic) regression of Z scored CyC-production PGS against immuno-oncology biomarkers (progression-free survival [PFS], overall survival [OS], durable clinical benefit [DCB]) in meta-analysis of European patients (n = 685) treated with checkpoint immunotherapy (anti-CTLA4 or anti-PD1/PD-L1).

(I) Odds ratios for clinical outcomes in meta-analysis of European patients (n = 685) treated with checkpoint immunotherapy (anti-CTLA4 or anti-PD1/PD-L1).

(legend continued on next page)

GCs to induce CyC secretion is highly context dependent, and can be co-opted by cancer cells, suggesting a possible immunomodulatory selective advantage for cancer cells.

### CyC directs recruitment of Trem2+ macrophages and failure of cancer immunotherapy

To investigate how CyC expression would provide a selective advantage to cancer cells, we used transient transfection with Cas9 and *CST3*-specific guide RNAs (gRNAs) to generate a *CST3*-knockout (*CST3*<sup>-/-</sup>) clone of the Mm1 cell line, which is derived from a liver metastasis of the autochthonous KPC model of pancreatic cancer,<sup>73</sup> which recapitulates the low immunogenicity and immunotherapy responsiveness of the human pancreatic cancer. Knockout was confirmed for extracellular CyC protein levels (Figure S6A) and Sanger sequencing of the predicted edit site (Figure S6B), which confirmed 97% editing efficiency. Isogenic sgScrambled and *CST3*<sup>-/-</sup> Mm1 clones had equivalent doubling times *in vitro* (sgScrambled: 23.3 h, 95% confidence interval [CI] 21.6–25.4; *CST3*<sup>-/-</sup>: 24 h, 95% CI 22.4–25.8; Figure S6C). In contrast, *CST3*<sup>-/-</sup> tumors had markedly attenuated growth kinetics *in vivo* (Figure 6A, independent replication; Figure S6D) and significantly lower endpoint tumor weights (Figure S6E, independent replication; Figure S6F). Three findings linked together led us to hypothesize that CyC might have an immunosuppressive function: the growth defect of *CST3*<sup>-/-</sup> tumors was only detectable *in vivo*, CyC is a known potent inhibitor of cysteine proteases,<sup>74</sup> such as those involved in antigen presentation,<sup>75</sup> and observation that CyC is a GC response gene. To minimize the effect of mouse-specific factors and to maximize the immune selective pressure on tumors, we inoculated mice with a sgScrambled tumor on the left flank and a *CST3*<sup>-/-</sup> tumor on the right flank (termed biflank model), and we treated mice with 2–3 doses of anti-PD-L1 antibody. This experiment confirmed the suppressed growth of *CST3*<sup>-/-</sup> versus paired sgScrambled tumors (Figures 6B and S6G–S6I). Consistent with this, the proportion of Ki67+ cells was significantly lower in *CST3*<sup>-/-</sup> versus paired sgScrambled tumors (Figure 6C). In contrast, growth kinetics were similar between tumors formed from sgScrambled and *CST3*<sup>-/-</sup> Mm1 clones inoculated in immunodeficient (Rag1-null) mice (Figure S6J), consistent with an immune-dependent growth defect in *CST3*<sup>-/-</sup> tumors.

To investigate whether altered growth kinetics reflected remodeling of the tumor microenvironment, we performed pancytokeratin immunohistochemistry and automated image segmentation to score the epithelial and non-epithelial areas in each tumor section (Figure S6K). The fraction of non-epithelial cells was markedly reduced in paired *CST3*<sup>-/-</sup> versus sgScrambled tumors (Figure 6D). In order to identify whether the depletion of specific non-epithelial cell types could explain this observation, we performed scRNA-seq on 2 sgScrambled and 2 *CST3*<sup>-/-</sup> uni-flank tumors, with 14,416 cells spanning 14 cell types passing quality control criteria (Figures 6E and S7A;

Table S7). scRNA-seq profiles of cancer cells confirmed *CST3* knockout in this compartment (Figure S7B;  $p = 9.16e-30$ , pseudobulk likelihood ratio test) but not in other compartments ( $p > 0.05$ ). To identify enriched or depleted cell types, we implemented the propeller method,<sup>76</sup> which models the logit-transformed cell type proportions as a function of the *CST3* genotype. At 5% false discovery rate (FDR), we identified a single-cell population, annotated as Trem2+ macrophages, that was significantly depleted in *CST3*<sup>-/-</sup> tumors (adjusted  $p = 0.004$ , moderated ANOVA test, ratio = 0.098; Figure 6F). We validated depletion of Trem2+ cells by digital image analysis of Trem2 immunohistochemistry (IHC) in a non-overlapping cohort of biflank sgScrambled and *CST3*<sup>-/-</sup> tumor sections (Figure 6G). We identified a highly non-random distribution of Trem2+ cells in both sgScrambled and *CST3*<sup>-/-</sup> sections, with a marked enrichment of Trem2+ cells in the outer rim of the tumor (Figure S7C). These findings suggest that CyC can influence migration or expansion of Trem2+ macrophages and that Trem2+ macrophages might regulate trafficking of immune cells into the tumor.

As Trem2+ monocytes can be detected in blood samples,<sup>77</sup> we hypothesized that GC treatment in critically ill patients would be associated with expansion of Trem2+ monocytes in blood. To investigate this, we reanalyzed CD14<sup>+</sup> monocyte scRNA-seq profiles from patients admitted to the intensive care unit (ICU) with COVID-19<sup>87</sup> and recovered dropped-out features to impute cluster gene expression,<sup>78</sup> thereby identifying a cluster of Trem2+ monocytes (termed cluster 0; Figure S7D). We identified significant expansion of cluster 0 at day 7 versus day 1 in patients treated with dexamethasone (adjusted  $p = 0.004$ , moderated ANOVA test, ratio = 16.1; Figure S7E) but not in dexamethasone-naïve patients (adjusted  $p = 0.749$ , ratio = 2.12; Figure S7F). This would support a stepwise model in which GC agonists increase extracellular CyC levels (Figure 5C), which in turn promotes recruitment or expansion of Trem2+ myeloid cells.

Others have shown that TREM2+ macrophages play a highly immunosuppressive role in the tumor microenvironment<sup>79</sup> and are known to be associated with failure of CPI targeting the PD-1/PD-L1 axis.<sup>80,81</sup> We hypothesized that increased CyC, by either inducing recruitment or expansion of Trem2+ macrophages or both, would be associated with reduced efficacy of CPI. Consistent with this, analyzing *CST3* gene expression in TCGA tumors showed significantly elevated *CST3* in the “immunologically quiet” immune subtype (C5 TCGA,  $p < 1e-10$ , Tukey’s test against all other subtypes; Figure S8A), which is characterized by the highest macrophage and lowest lymphocyte abundance. To investigate whether dynamically increased *CST3* gene expression would be associated with resistance to CPI, we reviewed paired pre- and post-treatment tumor biopsy scRNA-seq from patients ( $n = 8$ ) with metastatic basal cell carcinoma (BCC) treated with anti-PD-1.<sup>82</sup> Patients were split into responders ( $n = 3$ ) and non-responders ( $n = 5$ ; Figure S8B)

L1). Sample sizes for each clinical endpoint were  $n = 342, 685, \text{ and } 670$ , respectively. In each model, covariates included PC1–4, sex, and primary cancer. Error bars reflect 95% confidence interval. Lower hazard ratios (survival, Cox regression) or higher odds ratios (durable clinical benefit, logistic regression) reflect better therapeutic outcomes (annotated with purple arrow).

(I) Sensitivity analysis indicating odds ratio and 95% confidence interval for DCB in each cancer type.  $p$  values refer to two-sided  $t$  tests unless otherwise stated. \* $p < 0.05$ ; \*\* $p < 0.01$ , \*\*\* $p < 0.001$ .

Boxplots show median (central line) with interquartile range (IQR; box) and extrema (whiskers at  $1.5 \times$  IQR).

according to radiological response. Pre-treatment *CST3* expression in macrophages, dendritic cells (DCs), cancer-associated fibroblasts (CAFs), and tumor clusters did not predict CPI responsiveness ( $p > 0.05$ , paired t test). However, we observed evidence for significant dynamic *CST3* upregulation in CAFs and DCs in non-responder patients ( $p < 0.05$ , paired t test; Figures S8C–S8F).

We considered that the CyC-production PGS could reasonably capture the capacity to dynamically regulate secretion of CyC and thus predict failure of CPI. To estimate the CyC-production PGS in patients treated with CPI, we collated 8 published cohorts of patients with cancer treated with anti-PD-1, anti-PD-L1, or anti-CTLA-4 therapies with available germline exome sequencing (termed panIO cohort; Figure S6B; Table S2A). 685 patients with EUR ancestry passed quality control for inclusion (cohort characteristics summarized in Table S2B). Following imputation of common variants, the exome-wide CyC-production PGS was scored in each patient. Using multivariate Cox regression adjusted for sex, genetic ancestry, and tumor type, we demonstrated that the CyC-production PGS was associated with significantly worse progression-free survival (HR = 1.29,  $p = 0.0005$ ) and worse overall survival (HR = 1.09,  $p = 0.10$ ; Figure 6H). Using logistic regression with the same covariates, we further demonstrated that the PGS was associated with significantly reduced odds of durable clinical benefit (OR = 0.78,  $p = 0.003$ ; Figure 6H). This latter effect was broadly consistent in each tumor type (Figure 6I). Altogether, these findings suggest that increased intratumoral CyC production may make a substantial contribution to failure of cancer immunotherapy and that this effect may be mediated by recruitment of TREM2+ macrophages.

## DISCUSSION

This work proposes a mechanistic link between GC signaling, CyC, and Trem2+ macrophages. We investigated CyC's biological and clinical relevance using a combination of genetic analyses and *in vitro* and *in vivo* experimental medicine approaches, as well as clinically relevant prognostic and predictive studies and make contributions to two knowledge gaps.

Firstly, estimation of renal function is central to clinical practice by defining disease states, capturing acute systemic illness, and informing optimal medication dosing. Therefore, the relative strengths and weaknesses of CyC as a marker of renal function have substantial clinical relevance. CyC performs well as a renal function marker in healthy individuals, but its performance deteriorates in patients with acute disease and patients who receive GC agonists such as prednisolone, for example patients who have had a renal transplant.<sup>54</sup> Our findings provide additional context for seemingly contradictory studies<sup>11,83</sup> measuring the effect of GC treatment on CyC levels by demonstrating that GC-inducible CyC secretion is context dependent and not detected systemically in healthy mice and humans. An inflammatory stimulus could drive differentiation of monocytes to macrophages, in turn upregulating GR and enabling GC-dependent gene programs,<sup>62</sup> such as GC-inducible expression of *CST3*. Such a regulatory system would function to precisely tune the GC response program to minimize the off-target effects of

GCs, which are well recognized in clinical practice.<sup>84</sup> However, we recognize that GCs have pleiotropic effects and that other mechanisms may contribute to our observations. Furthermore, our data demonstrate that GCs are necessary (Figures 5A and 5B) but not sufficient (Figures 4H–4J) for induction of CyC in all biological contexts. In the context of inflammatory diseases, such as COVID-19, however, we show that dexamethasone treatment induces detectable increases in systemic CyC levels and have recently reported that CyC levels are dynamically regulated in COVID-19 patients and correlate with in-hospital mortality.<sup>49</sup> Altogether, this adds to the discourse of whether CyC is a robust marker of renal function in patients with significant inflammatory disease,<sup>54</sup> for whom correct estimation of kidney function is important.

Secondly, despite the widespread adoption of exogenous GCs as a treatment for inflammatory conditions and for treating autoimmune adverse effects of CPI, the exact mechanisms by which GCs cause immunosuppression remain elusive.<sup>84</sup> Our findings, together with work from others, suggest that CyC may be an effector of GC-induced immunosuppression: CyC is biologically active as a potent cysteine protease inhibitor,<sup>74</sup> CyC secretion can be induced by GC agonists in inflammatory macrophages, and this process is co-opted by cancer cells, for which the immune system is a dominant selection pressure.<sup>85</sup> Furthermore, CyC levels are highest in cerebrospinal and seminal fluid,<sup>74</sup> suggesting a role in immune privilege. We recognize that the GC effect is not exclusive to CyC and that CyC may function as one of many mechanisms of GC-induced immunosuppression. In support of this model, cancer cell-intrinsic CyC knockout attenuates tumor growth kinetics and proliferation in immunocompetent mice, consistent with evidence that germline *CST3* knockout abrogates metastasis *in vivo*.<sup>86</sup> Using single-cell omics and population genetics, we propose a model in which CyC is associated with recruitment of immunosuppressive Trem2+ macrophages,<sup>80,81</sup> which in turn promote failure of cancer immunotherapy. Alternatively, CyC may be necessary for the survival or maintenance of Trem2 expression in tumor-resident Trem2+ macrophages rather than promoting their recruitment. Future work has to determine the precise molecular mechanism by which this sequence occurs, as well as the origin of Trem2+ macrophages in the tumor microenvironment. One potential link is apolipoprotein E (ApoE), which is known to be secreted by cancer cells<sup>87</sup> and is a high-affinity ligand for the Trem2 receptor ( $K_d = 6$  nM).<sup>88</sup> Ligation of the Trem2 receptor by ApoE is sufficient to promote phagocytosis in TREM2-expressing microglial (brain-resident macrophage) cells and, in turn, activates *ApoE* RNA expression,<sup>89</sup> suggesting an autocrine positive feedback loop. Given that ApoE can be proteolytically processed<sup>90</sup> and that CyC is a potent protease inhibitor, CyC may act to regulate ApoE availability in the tumor microenvironment, thereby regulating recruitment and proliferation of Trem2+ macrophages. Furthermore, evidence that M2-like macrophages appear to not only modulate the *trans*-eQTL association at rs2749527 between cortisol and *CST3* expression but also express TREM2<sup>80,91</sup> suggests the existence of a single autocrine loop driving GC-induced expansion of TREM2+ macrophages. In support of connectivity between CyC, ApoE, and TREM2, Trem2-knockout mice have



accelerated amyloid burden in mouse models of Alzheimer's disease (AD),<sup>92</sup> TREM2 R47H mutations impair ApoE binding<sup>88</sup> and increase the risk of human AD,<sup>93</sup> while CyC knockout is associated with reduced amyloid burden.<sup>94</sup> Consistent with a direct immunosuppressive function of CyC, we demonstrate that germline predisposition to CyC production is significantly associated with substantial remodeling of the intertumoral immune landscape and failure of cancer immunotherapy. The evidence that the CyC-production PGS predicts failure of immunotherapy requires experimental confirmation in future work. If confirmed, a combination of PD-1/PD-L1 blockade and CyC inhibition may offer a therapeutic approach in patients who do not respond to CPI.

### Limitations of the study

While the focus on human datasets allowed us to investigate clinically relevant questions, we acknowledge that many of the analyses presented are limited by their associative nature. We have necessarily adopted several surrogate measures of CyC production, including *CST3* mRNA expression and CyC-residual (from blood tests) and CyC-production PGSs (from germline genetics). The time-dependent positive correlation between *CST3* mRNA expression and extracellular CyC protein *in vitro* (Figures 5A and 5B), as well as the association between the CyC-production PGS and *CST3* mRNA expression in the spleen (Figure 4A) indicate that these measures are linked and can probably be used interchangeably. Although associations between measured plasma CyC levels and clinical outcomes have the potential to be confounded in multiple directions, we and others argue that associations between patient-level PGSs and outcomes are more robust, potentially capturing causal associations.<sup>95</sup> Also, we performed all PGS analyses in either a held-out validation cohort (for the UKB) or an independent non-overlapping cohort (TCGA, panIO) to mitigate against the risk of overfitting.

### STAR★METHODS

Detailed methods are provided in the online version of this paper and include the following:

- KEY RESOURCES TABLE
- RESOURCE AVAILABILITY
  - Lead contact
  - Materials availability
  - Data and code availability
- EXPERIMENTAL MODEL AND SUBJECT DETAILS
  - Cell line models
  - Mouse models
  - Human studies
- METHOD DETAILS
  - Differentiation of human monocytes to macrophages and dendritic cells
  - *In vitro* glucocorticoid treatment
  - *In vivo* glucocorticoid treatment
  - Glucocorticoid treatment in human subjects
  - CyC quantification in patients with COVID-19
  - *In vivo* model of cancer progression

- Establishment of isogenic CyC<sup>-/-</sup> cell line
- Characterization of isogenic CyC<sup>-/-</sup> cell line
- Single-cell RNA sequencing of mouse tumors
- Tumor immunohistochemistry
- Tumor *in situ* hybridization

- QUANTIFICATION AND STATISTICAL ANALYSIS

- Cohort genomic data quality control
- GTEx project
- The Cancer Genome Atlas
- STARNET
- Immunotherapy meta-cohort
- Computation of principal components
- Genome-wide association analysis
- Structural equation modeling
- Processing of summary statistics
- Derivation and application of polygenic scores
- Functional genomics
- Gene expression profiling
- eQTL analysis
- scRNA-seq analysis
- Cosinor regression
- UKB cancer cohort
- Survival analyses
- Digital pathology analyses
- Statistical analysis

### SUPPLEMENTAL INFORMATION

Supplemental information can be found online at <https://doi.org/10.1016/j.xgen.2023.100347>.

### ACKNOWLEDGMENTS

This work was conducted using the UKB (application 58510). All data access relating to this manuscript was approved by the institutional IRB at Cold Spring Harbor Laboratory (CSHL), which determined that it does not meet the definition of human subject research under the purview of the IRB according to federal regulations. We thank all patients and their families who have volunteered to participate in clinical research, without whom this study would not have been possible. T.J. acknowledges funding from CSHL and grants from the Simons Foundation, the Mark Foundation (20-028-EDV), and the Nancy Gay Foundation (58391101). H.V.M. receives funding from the Simons Center for Quantitative Biology at CSHL. S.O.K. was supported by the Starr Centennial Scholarship at the CSHL of Biological Sciences. M.F. is supported by the “la Caixa” Foundation (ID 100010434) in the framework of the “La Caixa” Fellowship Program under agreement LCF/BQ/AA18/11680037. B.R.W. is supported by a Wellcome Investigator Award (107049/Z/15/Z). S.B. was supported by a Medical Research Council PhD studentship. This work was further supported by the Ministry of Education and Research (BMBF), as part of the National Research Node “Mass spectrometry in Systems Medicine” (MSCoreSys), under grant agreements 031L0220A (to M.R.) and 161L0221 (to V.D.). Computational analyses were performed with assistance from the US National Institutes of Health grant S10OD028632-01. L.G.N.d.A. received Alberta Innovates and Killam doctoral scholarships. S.S. received CIHR Vanier, Alberta Innovates, and Killam doctoral scholarships. G.J. acknowledges funding from Swedish Research Council (project nos. 2015-02561 and 2019-01112). Histological processing was performed by the CSHL Tissue Imaging Shared Facility with assistance from the Cancer Center Support grant 5P30CA045508.

### AUTHOR CONTRIBUTIONS

S.O.K., H.V.M., and T.J. conceived and designed the study. S.O.K. performed statistical and computational analyses with support from T.H. S.B. performed eQTL analyses in the STARNET cohort. H.L. contributed to data curation of clinical cohorts. T.M.T. and B.D. performed *in vitro* experiments, while S.O.K., N.M., B.D., and M.F. performed *in vivo* experiments. C.R. performed single-cell library preparation. S.O.K. performed single-cell analysis with support from Y.J.R.A.R.-K. and guidance from J.P. D.C. performed analyses of human clinical trial specimens under the supervision of G.J. S.S., N.R., B.Y., J.B., A.D., L.G.N.d.A., P.T.-L., M.R., F.K., and V.D. performed proteomic analyses of COVID-19 patient specimens. Q.G. optimized and executed histological staining. Scanned slides were computationally analyzed by D.L. under the supervision of V.H.K. B.R.W. provided input for interpretation of results and direction for further analyses. H.V.M. and T.J. supervised the project and guided all data analyses. S.O.K., H.V.M., and T.J. wrote the manuscript with input from all authors. All co-authors approved the final version of the manuscript.

### DECLARATION OF INTERESTS

The authors declare no competing interests.

### INCLUSION AND DIVERSITY

We support inclusive, diverse, and equitable conduct of research.

Received: June 13, 2022

Revised: March 23, 2023

Accepted: May 30, 2023

Published: June 23, 2023

### REFERENCES

- Janowitz, T., Williams, E.H., Marshall, A., Ainsworth, N., Thomas, P.B., Sammut, S.J., Shepherd, S., White, J., Mark, P.B., Lynch, A.G., et al. (2017). New model for estimating glomerular filtration rate in patients with cancer. *J. Clin. Oncol.* **35**, 2798–2805. <https://doi.org/10.1200/JCO.2017.72.7578>.
- Williams, E.H., Flint, T.R., Connell, C.M., Giglio, D., Lee, H., Ha, T., Gablenz, E., Bird, N.J., Weaver, J.M.J., Potts, H., et al. (2021). CamGFR v2: a new model for estimating the glomerular filtration rate from standardized or non-standardized creatinine in patients with cancer. *Clin. Cancer Res.* **27**, 1381–1390. <https://doi.org/10.1158/1078-0432.CCR-20-3201>.
- Rehberg, P.B. (1926). Studies on kidney function. *Biochem. J.* **20**, 447–460. <https://doi.org/10.1042/bj0200447>.
- Stevens, L.A., Coresh, J., Greene, T., and Levey, A.S. (2006). Assessing kidney function — measured and estimated glomerular filtration rate. *N. Engl. J. Med.* **354**, 2473–2483. <https://doi.org/10.1056/nejmra054415>.
- BUTLER, E.A., and FLYNN, F.V. (1961). The occurrence of post-gamma protein in urine: a new protein abnormality. *J. Clin. Pathol.* **14**, 172–178. <https://doi.org/10.1136/jcp.14.2.172>.
- Odden, M.C., Scherzer, R., Bacchetti, P., Szczech, L.A., Sidney, S., Grunfeld, C., and Shlipak, M.G. (2007). Cystatin C level as a marker of kidney function in human immunodeficiency virus infection: the FRAM study. *Arch. Intern. Med.* **167**, 2213–2219. <https://doi.org/10.1001/archinte.167.20.2213>.
- Levey, A.S. (1990). Measurement of renal function in chronic renal disease. *Kidney Int.* **38**, 167–184. <https://doi.org/10.1038/ki.1990.182>.
- Stevens, L.A., Schmid, C.H., Greene, T., Li, L., Beck, G.J., Joffe, M.M., Froissart, M., Kusek, J.W., Zhang, Y.L., Coresh, J., and Levey, A.S. (2009). Factors other than glomerular filtration rate affect serum cystatin C levels. *Kidney Int.* **75**, 652–660. <https://doi.org/10.1038/ki.2008.638>.
- Bökenkamp, A., Domanetzki, M., Zinck, R., Schumann, G., Byrd, D., and Brodehl, J. (1999). Cystatin C serum concentrations underestimate glomerular filtration rate in renal transplant recipients. *Clin. Chem.* <https://doi.org/10.1093/clinchem/45.10.1866>.
- STARZL, T.E., MARCHIORO, T.L., and WADDELL, W.R. (1963). The reversal of rejection in human renal homografts with subsequent development of homograft tolerance. *Surg. Gynecol. Obstet.* **117**, 385–395.
- Risch, L., Herklotz, R., Blumberg, A., and Huber, A.R. (2001). Effects of glucocorticoid immunosuppression on serum cystatin C concentrations in renal transplant patients. *Clin. Chem.* **47**, 2055–2059. <https://doi.org/10.1093/clinchem/47.11.2055>.
- Naka, M., Kadoya, M., Kosaka-Hamamoto, K., Morimoto, A., Miyoshi, A., Kakutani, M., Shoji, T., and Koyama, H. (2020). Overestimation of glomerular filtration rate calculated from serum creatinine as compared with cystatin c in patients with subclinical hypercortisolism: hyogo adrenal metabolic registry. *Endocr. J.* **67**, 469–476. <https://doi.org/10.1507/endocrj.EJ19-0478>.
- Jones, M., Denieffe, S., Griffin, C., Tinago, W., and Fitzgibbon, M.C. (2017). Evaluation of cystatin C in malignancy and comparability of estimates of GFR in oncology patients. *Pract. Lab. Med.* **8**, 95–104. <https://doi.org/10.1016/j.plabm.2017.05.005>.
- Kwon, W.S., Kim, T.S., Nahm, C.H., Moon, Y., and Kim, J.J. (2018). Aberrant cystatin-C expression in blood from patients with breast cancer is a suitable marker for monitoring tumor burden. *Oncol. Lett.* **16**, 5583–5590. <https://doi.org/10.3892/ol.2018.9380>.
- Kos, J., Krasovec, M., Cimerman, N., Nielsen, H.J., Christensen, I.J., and Brünner, N. (2000). Cysteine proteinase inhibitors stefin A, stefin B, and cystatin C in sera from patients with colorectal cancer: relation to Prognosis1. *Clin. Cancer Res.* **6**, 505–511.
- Jung, C.-Y., Kim, H.W., Han, S.H., Yoo, T.-H., Kang, S.-W., and Park, J.T. (2022). Creatinine–cystatin C ratio and mortality in cancer patients: a retrospective cohort study. *J. Cachexia Sarcopenia Muscle* **13**, 2064–2072. <https://doi.org/10.1002/jcsm.13006>.
- Lees, J.S., Ho, F., Parra-Soto, S., Celis-Morales, C., Welsh, P., Sullivan, M.K., Jani, B.D., Sattar, N., Lang, N.N., Pell, J.P., et al. (2021). Kidney function and cancer risk: an analysis using creatinine and cystatin C in a cohort study. *eClinicalMedicine* **38**, 101030. <https://doi.org/10.1016/j.eclinm.2021.101030>.
- Bjarnadóttir, M., Grubb, A., and Ólafsson, Í. (1995). Promoter-mediated, dexamethasone-induced increase in cystatin c production by hela cells. *Scand. J. Clin. Lab. Invest.* <https://doi.org/10.3109/00365519509110261>.
- Zhu, X.R., Ge, N., Wang, Y., Zhai, J.L., and Liu, C. (2019). Corticosteroids significantly increase cystatin C levels in the plasma by promoting cystatin C production in rats. *Ren. Fail.* **41**, 698–703. <https://doi.org/10.1080/0886022X.2019.1638798>.
- Zhai, J.-L., Ge, N., Zhen, Y., Zhao, Q., and Liu, C. (2016). Corticosteroids significantly increase serum cystatin C concentration without affecting renal function in symptomatic heart failure. *Clin. Lab.* **62**, 203–207. <https://doi.org/10.7754/clin.lab.2015.150701>.
- Pöge, U., Gerhardt, T., Bökenkamp, A., Stoffel-Wagner, B., Klehr, H.-U., Sauerbruch, T., and Woitas, R.P. (2004). Time course of low molecular weight proteins in the early kidney transplantation period—influence of corticosteroids. *Nephrol. Dial. Transplant.* **19**, 2858–2863.
- Mason, H.L., Hoehn, W.M., and Kendall, E.C. (1938). Chemical studies of supra-renal cortex iv structure of compounds C-D-E-F and G. *J. Biol. Chem.* **124**, 459–474.
- Weitzman, E.D., Fukushima, D., Nogueira, C., Roffwarg, H., Gallagher, T.F., and Hellman, L. (1971). Twenty-four hour pattern of the episodic secretion of cortisol in normal subjects. *J. Clin. Endocrinol. Metab.* **33**, 14–22. <https://doi.org/10.1210/jcem-33-1-14>.
- Reddy, T.E., Pauli, F., Sprouse, R.O., Neff, N.F., Newberry, K.M., Garabedian, M.J., and Myers, R.M. (2009). Genomic determination of the glucocorticoid response reveals unexpected mechanisms of gene

- regulation. *Genome Res.* 19, 2163–2171. <https://doi.org/10.1101/gr.097022.109>.
25. Galon, J., Franchimont, D., Hiroi, N., Frey, G., Boettner, A., Ehrhart-Bornstein, M., O'shea, J.J., Chrousos, G.P., and Bornstein, S.R. (2002). Gene profiling reveals unknown enhancing and suppressive actions of glucocorticoids on immune cells. *Faseb. J.* 16, 61–71. <https://doi.org/10.1096/fj.01-0245com>.
  26. Oelkers, W. (1996). Current concepts: adrenal insufficiency. *N. Engl. J. Med.* 335, 1206–1212. <https://doi.org/10.1056/NEJM199610173351607>.
  27. Hench, P.S., and Kendall, E.C. (1949). The effect of a hormone of the adrenal cortex (17-hydroxy-11-dehydrocorticosterone; compound E) and of pituitary adrenocorticotrophic hormone on rheumatoid arthritis. *Proc. Staff Meet. Mayo Clin.* 24, 181–197.
  28. Brahmer, J.R., Lacchetti, C., Schneider, B.J., Atkins, M.B., Brassil, K.J., Caterino, J.M., Chau, I., Ernstoff, M.S., Gardner, J.M., Ginex, P., et al. (2018). Management of immune-related adverse events in patients treated with immune checkpoint inhibitor therapy: American society of clinical oncology clinical practice guideline. *J. Clin. Oncol.* 36, 1714–1768. <https://doi.org/10.1200/JCO.2017.77.6385>.
  29. Connell, C.M., Raby, S., Beh, I., Flint, T.R., Williams, E.H., Fearon, D.T., Jodrell, D.I., and Janowitz, T. (2017). Cancer immunotherapy trial registrations increase exponentially but chronic immunosuppressive glucocorticoid therapy may compromise outcomes. *Ann. Oncol.* 28, 1678–1679. <https://doi.org/10.1093/annonc/mdx181>.
  30. Flint, T.R., Janowitz, T., Connell, C.M., Roberts, E.W., Denton, A.E., Coll, A.P., Jodrell, D.I., and Fearon, D.T. (2016). Tumor-induced IL-6 reprograms host metabolism to suppress anti-tumor immunity. *Cell Metabol.* 24, 672–684. <https://doi.org/10.1016/j.cmet.2016.10.010>.
  31. Obradović, M.M.S., Hamelin, B., Manevski, N., Couto, J.P., Sethi, A., Coissieux, M.M., Münst, S., Okamoto, R., Kohler, H., Schmidt, A., et al. (2019). Glucocorticoids promote breast cancer metastasis. *Nature*. <https://doi.org/10.1038/s41586-019-1019-4>.
  32. Janowitz, T., Kleeman, S., and Vonderheide, R.H. (2021). Reconsidering dexamethasone for antiemesis when combining chemotherapy and immunotherapy. *Oncol.* 26, 269–273. <https://doi.org/10.1002/onco.13680>.
  33. Grotzinger, A.D., Rhenmtulla, M., de Vlaming, R., Ritchie, S.J., Mallard, T.T., Hill, W.D., Ip, H.F., Marioni, R.E., McIntosh, A.M., Deary, I.J., et al. (2019). Genomic structural equation modelling provides insights into the multivariate genetic architecture of complex traits. *Nat. Human Behav.* 3, 513–525. <https://doi.org/10.1038/s41562-019-0566-x>.
  34. Yeo, N.C., O'Meara, C.C., Bonomo, J.A., Veth, K.N., Tomar, R., Flister, M.J., Drummond, I.A., Bowden, D.W., Freedman, B.I., Lazar, J., et al. (2015). Shroom3 contributes to the maintenance of the glomerular filtration barrier integrity. *Genome Res.* 25, 57–65. <https://doi.org/10.1101/gr.182881.114>.
  35. Hart, T.C., Gorry, M.C., Hart, P.S., Woodard, A.S., Shihabi, Z., Sandhu, J., Shirts, B., Xu, L., Zhu, H., Barmada, M.M., and Bleyer, A.J. (2002). Mutations of the UMOD gene are responsible for medullary cystic kidney disease 2 and familial juvenile hyperuricaemic nephropathy. *J. Med. Genet.* 39, 882–892. <https://doi.org/10.1136/jmg.39.12.882>.
  36. Smyth, D.J., Plagnol, V., Walker, N.M., Cooper, J.D., Downes, K., Yang, J.H.M., Howson, J.M.M., Stevens, H., McManus, R., Wijmenga, C., et al. (2008). Shared and distinct genetic variants in type 1 diabetes and celiac disease. *N. Engl. J. Med.* 359, 2767–2777. <https://doi.org/10.1056/nejmoa0807917>.
  37. Saevarsdottir, S., Olafsdottir, T.A., Ivarsdottir, E.V., Halldorsson, G.H., Gunnarsdottir, K., Sigurdsson, A., Johannesson, A., Sigurdsson, J.K., Juliusdottir, T., Lund, S.H., et al. (2020). FLT3 stop mutation increases FLT3 ligand level and risk of autoimmune thyroid disease. *Nature* 584, 619–623. <https://doi.org/10.1038/s41586-020-2436-0>.
  38. Zhernakova, A., Elbers, C.C., Ferwerda, B., Romanos, J., Trynka, G., Dubois, P.C., de Kovel, C.G.F., Franke, L., Oosting, M., Barisani, D., et al. (2010). Evolutionary and functional analysis of celiac risk loci reveals SH2B3 as a protective factor against bacterial infection. *Am. J. Hum. Genet.* 86, 970–977. <https://doi.org/10.1016/j.ajhg.2010.05.004>.
  39. Shin, S.Y., Fauman, E.B., Petersen, A.K., Krumsiek, J., Santos, R., Huang, J., Arnold, M., Erte, I., Forgetta, V., Yang, T.P., et al. (2014). An atlas of genetic influences on human blood metabolites. *Nat. Genet.* 46, 543–550. <https://doi.org/10.1038/ng.2982>.
  40. Park, M.J., D'Alecy, L.G., Anderson, M.A., Basrur, V., Feng, Y., Brady, G.F., Kim, D.I., Lahann, J., et al. (2019). Constitutive release of CPS1 in bile and its role as a protective cytokine during acute liver injury. *Proc. Natl. Acad. Sci. USA* 116, 9125–9134. <https://doi.org/10.1073/pnas.1822173116>.
  41. Carithers, L.J., and Moore, H.M. (2015). The genotype-tissue expression (GTEx) project. *Biopreserv. Biobanking* 13, 307–308. <https://doi.org/10.1089/bio.2015.29031.hmm>.
  42. Roadmap Epigenomics Consortium; Kundaje, A., Meuleman, W., Ernst, J., Bilenyk, M., Yen, A., Heravi-Moussavi, A., Kheradpour, P., Zhang, Z., Wang, J., et al. (2015). Integrative analysis of 111 reference human epigenomes. *Nature* 518, 317–330. <https://doi.org/10.1038/nature14248>.
  43. Ginès, P., Solà, E., Angeli, P., Wong, F., Nadim, M.K., and Kamath, P.S. (2018). Hepatorenal syndrome. *Nat. Rev. Dis. Prim.* 4, 23. <https://doi.org/10.1038/s41572-018-0022-7>.
  44. Privé, F., Arbel, J., and Vilhjálmsson, B.J. (2020). LDpred2: better, faster, stronger. *Bioinformatics*. <https://doi.org/10.1093/bioinformatics/btaa1029>.
  45. Diao, J.A., Inker, L.A., Levey, A.S., Tighiouart, H., Powe, N.R., and Manrai, A.K. (2021). In search of a better equation — performance and equity in estimates of kidney function. *N. Engl. J. Med.* 384, 396–399. <https://doi.org/10.1056/nejmp2028243>.
  46. Emerging Risk Factors Collaboration; Kaptoge, S., Di Angelantonio, E., Lowe, G., Pepys, M.B., Thompson, S.G., Collins, R., Danesh, J., Ford, C.E., Pressel, S.L., et al. (2010). C-reactive protein concentration and risk of coronary heart disease, stroke, and mortality: an individual participant meta-analysis. *Lancet* 375, 132–140. [https://doi.org/10.1016/S0140-6736\(09\)61717-7](https://doi.org/10.1016/S0140-6736(09)61717-7).
  47. Ganna, A., and Ingelsson, E. (2015). 5 year mortality predictors in 498 103 UK Biobank participants: a prospective population-based study. *Lancet* 386, 533–540. [https://doi.org/10.1016/S0140-6736\(15\)60175-1](https://doi.org/10.1016/S0140-6736(15)60175-1).
  48. Lees, J.S., Welsh, C.E., Celis-Morales, C.A., Mackay, D., Lewsey, J., Gray, S.R., Lyall, D.M., Cleland, J.G., Gill, J.M.R., Jhund, P.S., et al. (2019). Glomerular filtration rate by differing measures, albuminuria and prediction of cardiovascular disease, mortality and end-stage kidney disease. *Nat. Med.* 25, 1753–1760. <https://doi.org/10.1038/s41591-019-0627-8>.
  49. Kleeman, S.O., Cordioli, M., Timmers, P.R.H.J., Khan, A., Tober-Lau, P., Kurth, F., Demichev, V., Meyer, H.V., Wilson, J.F., Raiser, M., et al. (2022). Cystatin C is associated with adverse COVID-19 outcomes in diverse populations. *iScience* 25, 105040. <https://doi.org/10.1016/j.isci.2022.105040>.
  50. Crawford, A.A., Bankier, S., Altmaier, E., Barnes, C.L.K., Clark, D.W., Ermel, R., Friedrich, N., van der Harst, P., Joshi, P.K., Karhunen, V., et al. (2021). Variation in the SERPINA6/SERPINA1 locus alters morning plasma cortisol, hepatic corticosteroid binding globulin expression, gene expression in peripheral tissues, and risk of cardiovascular disease. *J. Hum. Genet.* 66, 625–636. <https://doi.org/10.1038/s10038-020-00895-6>.
  51. Giambartolomei, C., Vukcevic, D., Schadt, E.E., Franke, L., Hingorani, A.D., Wallace, C., and Plagnol, V. (2014). Bayesian test for colocalisation between pairs of genetic association studies using summary statistics. *PLoS Genet.* 10, e1004383. <https://doi.org/10.1371/journal.pgen.1004383>.
  52. Franzén, O., Ermel, R., Cohain, A., Akers, N.K., Di Narzo, A., Talukdar, H.A., Foroughi-Asl, H., Giambartolomei, C., Fullard, J.F., Sukhvasi, K., et al. (2016). Cardiometabolic risk loci share downstream cis- and trans-gene regulation across tissues and diseases. *Science*, eaad6970. <https://doi.org/10.1126/science.aad6970>.

53. Glastonbury, C.A., Couto Alves, A., El-Sayed Moustafa, J.S., and Small, K.S. (2019). Cell-type heterogeneity in adipose tissue is associated with complex traits and reveals disease-relevant cell-specific eQTLs. *Am. J. Hum. Genet.* *104*, 1013–1024. <https://doi.org/10.1016/j.ajhg.2019.03.025>.
54. Inker, L.A., Schmid, C.H., Tighiouart, H., Eckfeldt, J.H., Feldman, H.I., Greene, T., Kusek, J.W., Manzi, J., Van Lente, F., Zhang, Y.L., et al. (2012). Estimating glomerular filtration rate from serum creatinine and cystatin C. *N. Engl. J. Med.* *367*, 20–29.
55. Madissoon, E., Wilbrey-Clark, A., Miragaia, R.J., Saeb-Parsy, K., Mahbubani, K.T., Georgakopoulos, N., Harding, P., Polanski, K., Huang, N., Nowicki-Osuch, K., et al. (2019). ScRNA-seq assessment of the human lung, spleen, and esophagus tissue stability after cold preservation. *Genome Biol.* *21*, 1. <https://doi.org/10.1186/s13059-019-1906-x>.
56. Wilk, A.J., Rustagi, A., Zhao, N.Q., Roque, J., Martínez-Colón, G.J., McKechnie, J.L., Ivison, G.T., Ranganath, T., Vergara, R., Hollis, T., et al. (2020). A single-cell atlas of the peripheral immune response in patients with severe COVID-19. *Nat. Med.* *26*, 1070–1076. <https://doi.org/10.1038/s41591-020-0944-y>.
57. Uhlén, M., Fagerberg, L., Hallström, B.M., Lindskog, C., Oksvold, P., Mardinoglu, A., Sivertsson, Å., Kampf, C., Sjöstedt, E., Asplund, A., et al. (2015). Tissue-based map of the human proteome. *Science* *30*. <https://doi.org/10.1126/science.1260419>.
58. Vösa, U., Claringbould, A., Westra, H.J., Bonder, M.J., Deelen, P., Zeng, B., Kirsten, H., Saha, A., Kreuzhuber, R., Kasela, S., et al. (2018). Unraveling the polygenic architecture of complex traits using blood eQTL meta-analysis. Preprint at bioRxiv. <https://doi.org/10.1101/447367>.
59. Chantzichristos, D., Svensson, P.-A., Garner, T., Glad, C.A., Walker, B.R., Bergthorsdottir, R., Ragnarsson, O., Trimpou, P., Stimson, R.H., Borresen, S.W., et al. (2021). Identification of human glucocorticoid response markers using integrated multi-omic analysis from a randomized crossover trial. *Elife* *10*, e62236. <https://doi.org/10.7554/eLife.62236>.
60. Riemondy, K.A., Fu, R., Gillen, A.E., Sheridan, R.M., Tian, C., Daya, M., Hao, Y., and Hesselberth, J.R. (2020). clustifyr: an R package for automated single-cell RNA sequencing cluster classification. *F1000Research*. <https://doi.org/10.12688/f1000research.22969.2>.
61. Ley, K., Laudanna, C., Cybulsky, M.I., and Nourshargh, S. (2007). Getting to the site of inflammation: the leukocyte adhesion cascade updated. *Nat. Rev. Immunol.* *7*, 678–689.
62. Diaz-Jimenez, D., Petrillo, M.G., Busada, J.T., Hermoso, M.A., and Cidowski, J.A. (2020). Glucocorticoids mobilize macrophages by transcriptionally up-regulating the exopeptidase DPP4. *J. Biol. Chem.* *295*, 3213–3227. <https://doi.org/10.1074/jbc.RA119.010894>.
63. Nasser, J., Bergman, D.T., Fulco, C.P., Guckelberger, P., Doughty, B.R., Patwardhan, T.A., Jones, T.R., Nguyen, T.H., Ulirsch, J.C., Lekschas, F., et al. (2021). Genome-wide enhancer maps link risk variants to disease genes. *Nature* *593*, 238–243. <https://doi.org/10.1038/s41586-021-03446-x>.
64. Hoyer, A. (2017). Metaanalysis with R. G.Schwarzer, J. R.Carpenter, G.Rücker (2015) (Springer), *Biom. J.* <https://doi.org/10.1002/bimj.201600125>
65. Liao, M., Liu, Y., Yuan, J., Wen, Y., Xu, G., Zhao, J., Cheng, L., Li, J., Wang, X., Wang, F., et al. (2020). Single-cell landscape of bronchoalveolar immune cells in patients with COVID-19. *Nat. Med.* *26*, 842–844. <https://doi.org/10.1038/s41591-020-0901-9>.
66. The RECOVERY Collaborative Group (2021). Dexamethasone in hospitalized patients with Covid-19. *N. Engl. J. Med.* *384*, 693–704.
67. Sinha, S., Rosin, N.L., Arora, R., Labit, E., Jaffer, A., Cao, L., Farias, R., Nguyen, A.P., de Almeida, L.G.N., Dufour, A., et al. (2022). Dexamethasone modulates immature neutrophils and interferon programming in severe COVID-19. *Nat. Med.* *28*, 201–211. <https://doi.org/10.1038/s41591-021-01576-3>.
68. Messner, C.B., Demichev, V., Wendisch, D., Michalick, L., White, M., Freiwald, A., Textoris-Taube, K., Vernardis, S.I., Egger, A.-S., Kreidl, M., et al. (2020). Ultra-high-throughput clinical proteomics reveals classifiers of COVID-19 infection. *Cell Syst.* *11*, 11–24.e4. <https://doi.org/10.1016/j.cels.2020.05.012>.
69. Weisberg, S.P., McCann, D., Desai, M., Rosenbaum, M., Leibel, R.L., and Ferrante, A.W. (2003). Obesity is associated with macrophage accumulation in adipose tissue. *J. Clin. Invest.* *112*, 1796–1808. <https://doi.org/10.1172/jci19246>.
70. Newman, A.M., Steen, C.B., Liu, C.L., Gentles, A.J., Chaudhuri, A.A., Scherer, F., Khodadoust, M.S., Esfahani, M.S., Luca, B.A., Steiner, D., et al. (2019). Determining cell type abundance and expression from bulk tissues with digital cytometry. *Nat. Biotechnol.* *37*, 773–782. <https://doi.org/10.1038/s41587-019-0114-2>.
71. van der Wijst, M.G.P., de Vries, D.H., Groot, H.E., Trynka, G., Hon, C.C., Bonder, M.J., Stegle, O., Nawijn, M.C., Idaghdour, Y., van der Harst, P., et al. (2020). The single-cell eQTLGen consortium. *Elife* *9*, e52155. <https://doi.org/10.7554/eLife.52155>.
72. Acharya, N., Madi, A., Zhang, H., Klapholz, M., Escobar, G., Dulberg, S., Christian, E., Ferreira, M., Dixon, K.O., Fell, G., et al. (2020). Endogenous glucocorticoid signaling regulates CD8+ T cell differentiation and development of dysfunction in the tumor microenvironment. *Immunity* *53*, 658–671.e6. <https://doi.org/10.1016/j.immuni.2020.08.005>.
73. Hingorani, S.R., Wang, L., Multani, A.S., Combs, C., Deramaudt, T.B., Hruban, R.H., Rustgi, A.K., Chang, S., and Tuveson, D.A. (2005). Trp53R172H and KrasG12D cooperate to promote chromosomal instability and widely metastatic pancreatic ductal adenocarcinoma in mice. *Cancer Cell* *7*, 469–483. <https://doi.org/10.1016/j.ccr.2005.04.023>.
74. Barrett, A.J., Davies, M.E., and Grubb, A. (1984). The place of human  $\gamma$ -trace (cystatin C) amongst the cysteine proteinase inhibitors. *Biochem. Biophys. Res. Commun.* *120*, 631–636. [https://doi.org/10.1016/0006-291X\(84\)91302-0](https://doi.org/10.1016/0006-291X(84)91302-0).
75. Kitamura, H., Kamon, H., Sawa, S.-I., Park, S.-J., Katunuma, N., Ishihara, K., Murakami, M., and Hirano, T. (2005). IL-6-STAT3 controls intracellular MHC class II alphabeta dimer level through cathepsin S activity in dendritic cells. *Immunity* *23*, 491–502. <https://doi.org/10.1016/j.immuni.2005.09.010>.
76. Phipson, B., Sim, C.B., Porrello, E.R., Hewitt, A.W., Powell, J., and Oshlack, A. (2021). propeller: testing for differences in cell type proportions in single cell data. Preprint at bioRxiv. <https://doi.org/10.1101/2021.11.28.470236>.
77. Chan, G., White, C.C., Winn, P.A., Cimpean, M., Replogle, J.M., Glick, L.R., Cuedon, N.E., Ryan, K.J., Johnson, K.A., Schneider, J.A., et al. (2015). CD33 modulates TREM2: convergence of Alzheimer loci. *Nat. Neurosci.* *18*, 1556–1558. <https://doi.org/10.1038/nn.4126>.
78. Alquicira-Hernandez, J., and Powell, J.E. (2021). Nebulosa recovers single-cell gene expression signals by kernel density estimation. *Bioinformatics* *37*, 2485–2487. <https://doi.org/10.1093/bioinformatics/btab003>.
79. Katzenelenbogen, Y., Sheban, F., Yalin, A., Yofe, I., Svetlichnyy, D., Jaitin, D.A., Bornstein, C., Moshe, A., Keren-Shaul, H., Cohen, M., et al. (2020). Coupled scRNA-Seq and intracellular protein activity reveal an immunosuppressive role of TREM2 in cancer. *Cell* *182*, 872–885.e19.
80. Binnewies, M., Pollack, J.L., Rudolph, J., Dash, S., Abushawish, M., Lee, T., Jahchan, N.S., Canaday, P., Lu, E., Norng, M., et al. (2021). Targeting TREM2 on tumor-associated macrophages enhances immunotherapy. *Cell Rep.* *37*, 109844. <https://doi.org/10.1016/j.celrep.2021.109844>.
81. Molgora, M., Esaulova, E., Vermi, W., Hou, J., Chen, Y., Luo, J., Brioschi, S., Bugatti, M., Omodei, A.S., Ricci, B., et al. (2020). TREM2 modulation remodels the tumor myeloid landscape enhancing anti-PD-1 immunotherapy. *Cell* *182*, 886–900.e17. <https://doi.org/10.1016/j.cell.2020.07.013>.
82. Yost, K.E., Satpathy, A.T., Wells, D.K., Qi, Y., Wang, C., Kageyama, R., McNamara, K.L., Granja, J.M., Sarin, K.Y., Brown, R.A., et al. (2019).



- Clonal replacement of tumor-specific T cells following PD-1 blockade. *Nat. Med.* 25, 1251–1259. <https://doi.org/10.1038/s41591-019-0522-3>.
83. Bökenkamp, A., van Wijk, J.A., Lentze, M.J., and Stoffel-Wagner, B. (2002). Effect of corticosteroid therapy on serum cystatin C and  $\beta$ 2-microglobulin concentrations. *Clin. Chem.* 48, 1123–1126. <https://doi.org/10.1093/clinchem/48.7.1123>.
  84. Walker, B.R. (2006). Cortisol - cause and cure for metabolic syndrome? *Diabet. Med.* 23, 1281–1288. <https://doi.org/10.1111/j.1464-5491.2006.01998.x>.
  85. Hanahan, D., and Weinberg, R.A. (2011). Hallmarks of cancer: the next generation. *Cell* 144, 646–674.
  86. Huh, C.G., Håkansson, K., Nathanson, C.M., Thorgeirsson, U.P., Jonsson, N., Grubb, A., Abrahamson, M., and Karlsson, S. (1999). Decreased metastatic spread in mice homozygous for a null allele of the cystatin C protease inhibitor gene. *Mol. Pathol.* 52, 332–340. <https://doi.org/10.1136/mp.52.6.332>.
  87. Pencheva, N., Tran, H., Buss, C., Huh, D., Drobnjak, M., Busam, K., and Tavazoie, S.F. (2012). Convergent multi-miRNA targeting of ApoE drives LRP1/LRP8-dependent melanoma metastasis and angiogenesis. *Cell* 151, 1068–1082. <https://doi.org/10.1016/j.cell.2012.10.028>.
  88. Atagi, Y., Liu, C.-C., Painter, M.M., Chen, X.-F., Verbeeck, C., Zheng, H., Li, X., Rademakers, R., Kang, S.S., Xu, H., et al. (2015). Apolipoprotein E is a ligand for triggering receptor expressed on myeloid cells 2 (TREM2). *J. Biol. Chem.* 290, 26043–26050. <https://doi.org/10.1074/jbc.M115.679043>.
  89. Krasemann, S., Madore, C., Cialic, R., Baufeld, C., Calcagno, N., El Fattimy, R., Beckers, L., O’Loughlin, E., Xu, Y., Fanek, Z., et al. (2017). The TREM2-APOE pathway drives the transcriptional phenotype of dysfunctional microglia in neurodegenerative diseases. *Immunity* 47, 566–581.e9. <https://doi.org/10.1016/j.immuni.2017.08.008>.
  90. Tudorache, I.F., Trusca, V.G., and Gafencu, A.V. (2017). Apolipoprotein E - a multifunctional protein with implications in various pathologies as a result of its structural features. *Comput. Struct. Biotechnol. J.* 15, 359–365. <https://doi.org/10.1016/j.csbj.2017.05.003>.
  91. Byers, D.E., Wu, K., Dang-Vu, G., Jin, X., Agapov, E., Zhang, X., Battaile, J.T., Schechtman, K., Yusen, R., Pierce, R.A., and Holtzman, M.J. (2018). Triggering receptor expressed on myeloid cells-2 expression tracks with M2-like macrophage activity and disease severity in COPD. *Chest* 153, 77–86. <https://doi.org/10.1016/j.chest.2017.09.044>.
  92. Wang, Y., Cella, M., Mallinson, K., Ulrich, J.D., Young, K.L., Robinette, M.L., Gilfillan, S., Krishnan, G.M., Sudhakar, S., Zinselmeyer, B.H., et al. (2015). TREM2 lipid sensing sustains the microglial response in an Alzheimer’s disease model. *Cell* 160, 1061–1071. <https://doi.org/10.1016/j.cell.2015.01.049>.
  93. Guerreiro, R., Wojtas, A., Bras, J., Carrasquillo, M., Rogava, E., Majounie, E., Cruchaga, C., Sassi, C., Kauwe, J.S.K., Younkin, S., et al. (2013). TREM2 variants in Alzheimer’s disease. *N. Engl. J. Med.* 368, 117–127. <https://doi.org/10.1056/NEJMoa1211851>.
  94. Sun, B., Zhou, Y., Halabisky, B., Lo, I., Cho, S.-H., Mueller-Stieber, S., Devidze, N., Wang, X., Grubb, A., and Gan, L. (2008). Cystatin C-cathepsin B Axis regulates amyloid beta levels and associated neuronal deficits in an animal model of Alzheimer’s disease. *Neuron* 60, 247–257. <https://doi.org/10.1016/j.neuron.2008.10.001>.
  95. Richardson, T.G., Harrison, S., Hemani, G., and Davey Smith, G. (2019). An atlas of polygenic risk score associations to highlight putative causal relationships across the human phenome. *Elife* 8, e43657. <https://doi.org/10.7554/eLife.43657>.
  96. Jerby-Arnon, L., Shah, P., Cuoco, M.S., Rodman, C., Su, M.J., Melms, J.C., Leeson, R., Kanodia, A., Mei, S., Lin, J.R., et al. (2018). A cancer cell program promotes T cell exclusion and resistance to checkpoint blockade. *Cell* 175, 984–997.e24. <https://doi.org/10.1016/j.cell.2018.09.006>.
  97. Cao, Y., Bender, I.K., Konstantinidis, A.K., Shin, S.C., Jewell, C.M., Cidlowski, J.A., Schleimer, R.P., and Lu, N.Z. (2013). Glucocorticoid receptor translational isoforms underlie maturational stage-specific glucocorticoid sensitivities of dendritic cells in mice and humans. *Blood* 121, 1553–1562. <https://doi.org/10.1182/blood-2012-05-432336>.
  98. Franzén, O., Gan, L.M., and Björkegren, J.L.M. (2019). PanglaoDB: a web server for exploration of mouse and human single-cell RNA sequencing data. *Database*. <https://doi.org/10.1093/database/baz046>.
  99. Sanjana, N.E., Shalem, O., and Zhang, F. (2014). Improved vectors and genome-wide libraries for CRISPR screening. *Nat. Methods* 11, 783–784. <https://doi.org/10.1038/nmeth.3047>.
  100. Bycroft, C., Freeman, C., Petkova, D., Band, G., Elliott, L.T., Sharp, K., Motyer, A., Vukcevic, D., Delaneau, O., O’Connell, J., et al. (2018). The UK Biobank resource with deep phenotyping and genomic data. *Nature* 562, 203–209. <https://doi.org/10.1038/s41586-018-0579-z>.
  101. Anderson, C.A., Pettersson, F.H., Clarke, G.M., Cardon, L.R., Morris, A.P., and Zondervan, K.T. (2010). Data quality control in genetic case-control association studies. *Nat. Protoc.* 5, 1564–1573. <https://doi.org/10.1038/nprot.2010.116>.
  102. Sayaman, R.W., Saad, M., Thorsson, V., Hu, D., Hendrickx, W., Roelands, J., Porta-Pardo, E., Mokrab, Y., Farshidfar, F., Kirchhoff, T., et al. (2021). Germline genetic contribution to the immune landscape of cancer. *Immunity* 54, 367–386.e8. <https://doi.org/10.1016/j.immuni.2021.01.011>.
  103. Kim, S., Scheffler, K., Halpern, A.L., Bekritsky, M.A., Noh, E., Källberg, M., Chen, X., Kim, Y., Beyter, D., Krusche, P., and Saunders, C.T. (2018). Strelka2: fast and accurate calling of germline and somatic variants. *Nat. Methods* 15, 591–594. <https://doi.org/10.1038/s41592-018-0051-x>.
  104. Loh, P.R., Kichaev, G., Gazal, S., Schoech, A.P., and Price, A.L. (2018). Mixed-model association for biobank-scale datasets. *Nat. Genet.* 50, 906–908. <https://doi.org/10.1038/s41588-018-0144-6>.
  105. Ghousaini, M., Mountjoy, E., Carmona, M., Peat, G., Schmidt, E.M., Hercules, A., Fumis, L., Miranda, A., Carvalho-Silva, D., Buniello, A., et al. (2021). Open Targets Genetics: systematic identification of trait-associated genes using large-scale genetics and functional genomics. *Nucleic Acids Res.* 49, D1311–D1320. <https://doi.org/10.1093/nar/gkaa840>.
  106. Finucane, H.K., Bulik-Sullivan, B., Gusev, A., Trynka, G., Reshef, Y., Loh, P.R., Anttila, V., Xu, H., Zang, C., Farh, K., et al. (2015). Partitioning heritability by functional annotation using genome-wide association summary statistics. *Nat. Genet.* 47, 1228–1235. <https://doi.org/10.1038/ng.3404>.
  107. de Leeuw, C.A., Mooij, J.M., Heskes, T., and Posthuma, D. (2015). MAGMA: generalized gene-set analysis of GWAS data. *PLoS Comput. Biol.* 11, e1004219. <https://doi.org/10.1371/journal.pcbi.1004219>.
  108. Zhu, Z., Zhang, F., Hu, H., Bakshi, A., Robinson, M.R., Powell, J.E., Montgomery, G.W., Goddard, M.E., Wray, N.R., Visscher, P.M., and Yang, J. (2016). Integration of summary data from GWAS and eQTL studies predicts complex trait gene targets. *Nat. Genet.* 48, 481–487. <https://doi.org/10.1038/ng.3538>.
  109. Gel, B., and Serra, E. (2017). KaryoploteR: an R/Bioconductor package to plot customizable genomes displaying arbitrary data. *Bioinformatics* 33, 3088–3090. <https://doi.org/10.1093/bioinformatics/btx346>.
  110. Robinson, M.D., McCarthy, D.J., and Smyth, G.K. (2010). edgeR: a Bioconductor package for differential expression analysis of digital gene expression data. *Bioinformatics* 26, 139–140. <https://doi.org/10.1093/bioinformatics/btp616>.
  111. Risso, D., Schwartz, K., Sherlock, G., and Dudoit, S. (2011). GC-content normalization for RNA-seq data. *BMC Bioinf.* 12, 480. <https://doi.org/10.1186/1471-2105-12-480>.



112. Qi, J., Asl, H.F., Björkegren, J., and Michoel, T. (2014). KruX: matrix-based non-parametric eQTL discovery. *BMC Bioinf.* *15*, 11. <https://doi.org/10.1186/1471-2105-15-11>.
113. Hao, Y., Hao, S., Andersen-Nissen, E., Mauck, W.M., Zheng, S., Butler, A., Lee, M.J., Wilk, A.J., Darby, C., Zager, M., et al. (2021). Integrated analysis of multimodal single-cell data. *Cell* *184*, 3573–3587.e29. <https://doi.org/10.1016/j.cell.2021.04.048>.
114. Tickle, T., Tirosh, I., Georgescu, C., and Brown, M.,H.B. (2019). inferCNV of the trinity CTAT project. *Klarman Cell Obs. (Broad Inst. MIT Harvard)*
115. McGinnis, C.S., Murrow, L.M., and Gartner, Z.J. (2019). DoubletFinder: doublet detection in single-cell RNA sequencing data using artificial nearest neighbors. *Cell Syst.* *8*, 329–337.e4. <https://doi.org/10.1016/j.cels.2019.03.003>.
116. Squair, J.W., Gautier, M., Kathe, C., Anderson, M.A., James, N.D., Hutson, T.H., Hudelle, R., Qaiser, T., Matson, K.J.E., Barraud, Q., et al. (2021). Confronting false discoveries in single-cell differential expression. *Nat. Commun.* *12*, 5692. <https://doi.org/10.1038/s41467-021-25960-2>.

## STAR★METHODS

### KEY RESOURCES TABLE

| REAGENT or RESOURCE                                                         | SOURCE                                                                                                                                                                                                      | IDENTIFIER  |
|-----------------------------------------------------------------------------|-------------------------------------------------------------------------------------------------------------------------------------------------------------------------------------------------------------|-------------|
| <b>Antibodies</b>                                                           |                                                                                                                                                                                                             |             |
| Anti-TREM2 antibody                                                         | Proteintech                                                                                                                                                                                                 | 13483-1-AP  |
| Anti-Ki67 antibody                                                          | Thermo Fisher                                                                                                                                                                                               | 14-5698-82  |
| Anti-pan-cyclokeratin antibody (HRP-conjugated)                             | Novus Bio                                                                                                                                                                                                   | NBP1-48348H |
| Anti-F4/80 antibody                                                         | Thermo Fisher                                                                                                                                                                                               | 14-4801-82  |
| <b>Critical commercial assays</b>                                           |                                                                                                                                                                                                             |             |
| Human Cystatin C ELISA Kit                                                  | R&D                                                                                                                                                                                                         | DSCTC0      |
| Mouse Cystatin C ELISA Kit                                                  | Abcam                                                                                                                                                                                                       | ab119590    |
| Mouse Cystatin C ELISA Kit (SimpleStep)                                     | Abcam                                                                                                                                                                                                       | ab201280    |
| Corticosterone ELISA                                                        | IBL International                                                                                                                                                                                           | RE52211     |
| <b>Deposited data</b>                                                       |                                                                                                                                                                                                             |             |
| UK Biobank                                                                  | <a href="https://www.ukbiobank.ac.uk/">https://www.ukbiobank.ac.uk/</a>                                                                                                                                     |             |
| Genotype-Tissue Expression (GTEx)                                           | <a href="https://gtexportal.org/home/">https://gtexportal.org/home/</a>                                                                                                                                     | phs000424   |
| The Cancer Genome Atlas                                                     | <a href="https://portal.gdc.cancer.gov/">https://portal.gdc.cancer.gov/</a>                                                                                                                                 | phs000178   |
| STARNET                                                                     |                                                                                                                                                                                                             | N/A         |
| Pan-UK Biobank project                                                      | <a href="https://pan.ukbb.broadinstitute.org/">https://pan.ukbb.broadinstitute.org/</a>                                                                                                                     | N/A         |
| ENCODE                                                                      | <a href="https://www.encodeproject.org/">https://www.encodeproject.org/</a>                                                                                                                                 | N/A         |
| panIO patient cohort                                                        | Accession codes detailed in Table S2A                                                                                                                                                                       | N/A         |
| Single-cell RNA sequencing of monocytes from COVID-19 patients – this paper | Figshare: <a href="https://doi.org/10.6084/m9.figshare.14330795.v13">https://doi.org/10.6084/m9.figshare.14330795.v13</a> , 'covid.combined_final.CD14.Mono.Robj'                                           | N/A         |
| GWAS summary statistics (CyC-production) – this paper                       | GWAS Catalog: GCP000606                                                                                                                                                                                     | N/A         |
| Polygenic score (CyC-production) – this paper                               | Deposited on PGS Catalog: PGP000463, <a href="https://doi.org/10.1101/2021.08.17.21261668">https://doi.org/10.1101/2021.08.17.21261668</a>                                                                  | N/A         |
| Raw data for single-cell RNA sequencing of mouse tumors – this paper        | Deposited on Sequence Read Archive: PRJNA961746                                                                                                                                                             | N/A         |
| Processed data for single-cell RNA sequencing of mouse tumors – this paper  | Figshare: <a href="https://doi.org/10.6084/m9.figshare.20063402">https://doi.org/10.6084/m9.figshare.20063402</a>                                                                                           | N/A         |
| Single-cell RNA sequencing from Yost et al. <sup>82</sup>                   | NCBI GEO: GSE123813                                                                                                                                                                                         | N/A         |
| Single-cell RNA sequencing from Jerby-Anon et al. <sup>96</sup>             | Single cell portal: SCP109                                                                                                                                                                                  | N/A         |
| Single-cell RNA sequencing from Madisson et al. <sup>55</sup>               | Human Cell Atlas: <a href="https://data.humancellatlas.org/explore/projects/c4077b3c-5c98-4d26-a614-246d12c2e5d7">https://data.humancellatlas.org/explore/projects/c4077b3c-5c98-4d26-a614-246d12c2e5d7</a> | N/A         |
| Single-cell RNA sequencing from Wilk et al. <sup>56</sup>                   | Single cell portal: SCP345                                                                                                                                                                                  | N/A         |
| Digital pathology (scanned slides from Mm1 model) – this paper              | Mendeley Data: <a href="https://doi.org/10.17632/kcwn7bpdf9.1">https://doi.org/10.17632/kcwn7bpdf9.1</a>                                                                                                    | N/A         |
| <b>Experimental models: Cell lines</b>                                      |                                                                                                                                                                                                             |             |
| Mm1 cell line                                                               | Gift from Tuveson Laboratory (Cold Spring Harbor Laboratory)                                                                                                                                                | N/A         |
| A549 cell line                                                              | ATCC                                                                                                                                                                                                        | N/A         |
| C26 cell line                                                               | Maintained in Janowitz Laboratory (Cold Spring Harbor Laboratory)                                                                                                                                           | N/A         |

(Continued on next page)

**Continued**

| REAGENT or RESOURCE                           | SOURCE                                                                                                    | IDENTIFIER |
|-----------------------------------------------|-----------------------------------------------------------------------------------------------------------|------------|
| HeLa cell line                                | Gift from Cold Spring Harbor Laboratory                                                                   | N/A        |
| THP-1 cell line                               | ATCC                                                                                                      | N/A        |
| Primary human monocytes                       | STEMCELL Technologies                                                                                     | 70034      |
| <b>Experimental models: Organisms/strains</b> |                                                                                                           |            |
| C57BL/6J                                      | Jax                                                                                                       | 000664     |
| C57BL/6J; Rag1-KO                             | Jax                                                                                                       | 002216     |
| BALB/c                                        | Charles River                                                                                             | N/A        |
| BALB/cJ                                       | Jax                                                                                                       | 000651     |
| <b>Oligonucleotides</b>                       |                                                                                                           |            |
| Primer sequences                              | Detailed in <a href="#">Table S5</a>                                                                      | N/A        |
| Guide RNA sequences                           | Detailed in <a href="#">Table S6</a>                                                                      | N/A        |
| <b>Software and algorithms</b>                |                                                                                                           |            |
| Code to reproduce core analyses – this paper  | Zenodo: <a href="https://doi.org/10.5281/zenodo.7921111">https://doi.org/10.5281/zenodo.7921111</a>       | N/A        |
| PLINK                                         | <a href="https://www.cog-genomics.org/plink/">https://www.cog-genomics.org/plink/</a>                     | N/A        |
| Hail                                          | <a href="https://hail.is/">https://hail.is/</a>                                                           | N/A        |
| R                                             | <a href="https://www.r-project.org/">https://www.r-project.org/</a>                                       | N/A        |
| TOPMED                                        | <a href="https://imputation.biodatacatalyst.nih.gov/#!">https://imputation.biodatacatalyst.nih.gov/#!</a> | N/A        |
| Genomic-SEM                                   | <a href="https://github.com/GenomicSEM/GenomicSEM">https://github.com/GenomicSEM/GenomicSEM</a>           | N/A        |
| LDSC                                          | <a href="https://github.com/bulik/ldsc">https://github.com/bulik/ldsc</a>                                 | N/A        |
| LDpred2                                       | <a href="https://privefl.github.io/bigsnpr">https://privefl.github.io/bigsnpr</a>                         | N/A        |
| Seurat                                        | <a href="https://github.com/satijalab/seurat">https://github.com/satijalab/seurat</a>                     | N/A        |

**RESOURCE AVAILABILITY**

**Lead contact**

Further information and requests for resources should be directed to the Lead Contact, Tobias Janowitz ([janowitz@cshl.edu](mailto:janowitz@cshl.edu)).

**Materials availability**

CyC<sup>-/-</sup> Mm1 cell line that was generated as part of this study is available from the [lead contact](#) with a completed material transfers agreement.

**Data and code availability**

- Due to the data use agreements for the datasets analyzed in this manuscript, we are unable to directly share or distribute any patient-level data except for COVID-19 patient scRNA-seq (reposited at <https://doi.org/10.6084/m9.figshare.14330795.v13>, filename 'covid.combined\_final.CD14.Mono.Robj'). GWAS summary statistics are published alongside the study (, and polygenic scores are deposited in PGS Catalog (<https://doi.org/10.1101/2021.08.17.21261668>). To facilitate dataset requests from applicable data use committees, we provide all accession codes for all datasets relating to this manuscript in the [key resources table](#) and in [Table S2A](#). UK Biobank data can be requested through the application process detailed at <https://www.ukbiobank.ac.uk/>.
- Single-cell RNA sequencing raw sequencing data (FASTQ) is reposited in the Sequence Read Archive (SRA) under BioProject PRJNA961746, while the processed Seurat matrix is available from Figshare (<https://doi.org/10.6084/m9.figshare.20063402>).
- Digital pathology derived from histological and immunohistochemical analyses of mouse tumor sections (Mm1 model) has been deposited at <https://data.mendeley.com/datasets/kcwn7bpdf9/1>.
- Code to reproduce core computational and statistical analyses has been reposited on Github at <https://github.com/Janowitz-Lab/cystatic> (<https://doi.org/10.5281/zenodo.7921111>).
- Where data use agreements allow, additional information required to reanalyze the data reported in this paper is available from the [lead contact](#) upon request.

## EXPERIMENTAL MODEL AND SUBJECT DETAILS

### Cell line models

Human lung carcinoma cell line A549 was purchased from ATCC (CCL-185). Human cervical cancer cell line HeLa was obtained from Cold Spring Harbor Laboratory. Human acute monocytic leukemic cell line THP-1 was purchased from ATCC (TIB-202). Mm1 cells were a gift from D. Tuveson (Cold Spring Harbor Laboratory, NY), and are derived from a liver metastasis in the KPC model of pancreatic ductal adenocarcinoma.<sup>73</sup> A549, HeLa and Mm1 cell lines were cultured in DMEM (Gibco 11965092, 4mM glutamine) supplemented with 10% FBS and 1% penicillin-streptomycin. THP-1 and C26 cells were cultured in RPMI (Gibco 11875093, 2mM glutamine) supplemented with 10% FBS and 1% penicillin-streptomycin. Macrophage-like differentiation in THP-1 cells was induced by treatment with 50nM PMA (Sigma) for 48 h, before replacement with PMA-free media and recovery for 24 h prior to treatment. Cell viability was checked by trypan blue method and was consistently above 95% prior to seeding. All cell lines were cultured at 37°C in 5% CO<sub>2</sub>. Dexamethasone and PMA (phorbol 12-myristate 13-acetate) were purchased from Sigma-Aldrich. DMEM and RPMI cell culture media, fetal bovine serum (FBS), penicillin/streptomycin (P/S) and Dulbecco's phosphate-buffered saline (DPBS) were purchased from Gibco.

### Mouse models

Wild-type BALB/c mice obtained from Charles River Laboratories (for C26 model of cancer progression) and Jax (for dexamethasone treatment); and wild-type and Rag1-KO C57BL/6J mice were obtained from Jax. All mice examined as part of this study were male as C26 and Mm1 lines were isolated from male mice. Mice were allowed to acclimatize for 7 days from arrival in the Cold Spring Harbor Laboratory animal facility. All animal experiments and care were performed in accordance with the Cold Spring Harbor Laboratory (CSHL) Institutional Animal Care and Use Committee (IACUC) and the National Institutes of Health Guide for the Care and Use of Laboratory Animals. Mice were kept in specific pathogen-free conditions on a 24 h 12:12 light-dark cycle. Tumor samples were obtained by dissection of mice after euthanasia by cervical dislocation and tumor weights were routinely recorded. Plasma samples were obtained from tail bleeds and terminal cardiac bleeds. Tail bleeds were performed using a scalpel via tail venesection, and terminal bleeds were obtained at endpoint (cachexia) through exsanguination via cardiac puncture under isoflurane anesthesia. Samples were kept on ice at all times. Plasma samples were collected into heparin-coated capillary tubes to avoid coagulation and were processed as follows: centrifuge spin at 14,000 rpm for 5 min at 4°C, snap frozen in liquid nitrogen, and stored at -80°C.

### Human studies

This study incorporates human subjects from three independent studies. All human subjects gave informed consent, and all studies were approved by the respective institutional review boards.

1. *Cohort 1*. This cohort has been reported previously<sup>59</sup> and refers to a prospective, single-center, single-blind randomized cross-over clinical trial that recruited 10 subjects (men and women) with primary adrenal insufficiency (Addison's disease). The study was approved by the Ethics Review Board of the University of Gothenburg, Sweden (permit no. 374-13, 8 August 2013) and conducted in accordance with the Declaration of Helsinki. Written informed consent was obtained from all subjects before participation. The study was registered at [ClinicalTrials.gov](https://clinicaltrials.gov) with identifier NCT02152553.
2. *Cohort 2*. This cohort has been reported previously<sup>67</sup> and refers to a prospective study that recruited 14 patients with COVID-19 necessitating admission to ICU, of which 6 received dexamethasone treatment as part of their clinical course. All patients or their surrogate decision-makers gave informed consent for participation. This study was approved by the Conjoint Health Research Ethics Board at the University of Calgary (Ethics ID: REB20-0481) and is consistent with the Declaration of Helsinki.
3. *Cohort 3*. This cohort (Pa-COVID-19 study) has been reported previously<sup>68</sup> and refers to a prospective observational cohort study at Charité Universitätsmedizin Berlin. Patients with a PCR-confirmed diagnosis of SARS-CoV-2 infection were eligible for inclusion in the study. The Pa-COVID-19 study is carried out according to the Declaration of Helsinki and the principles of Good Clinical Practice (ICH 1996) where applicable and was approved by the ethics committee of Charité- Universitätsmedizin Berlin (EA2/066/20).

## METHOD DETAILS

### Differentiation of human monocytes to macrophages and dendritic cells

Human Peripheral Blood Monocytes were obtained from STEMCELL Technologies (70034). For monocyte-to-macrophage differentiation, monocytes were seeded in 96-well tissue-culture treated plates at  $1 \times 10^5$  cells/well in ImmunoCult-SF Macrophage Medium (10961) containing 50 ng/mL macrophage colony stimulating factor (M-CSF, 78057.1) for 4 days. M0-like macrophages were further differentiated into M1-like macrophages by addition of 50 ng/mL interferon-gamma (IFN $\gamma$ , 78020.1) and 10 ng/mL Lipopolysaccharides (LPS, Thermo Fisher) and M2-like macrophages by addition of 10 ng/mL interleukin-4 (IL-4, 78045.1) for 2 days. For monocyte-to-dendritic cell differentiation,  $1 \times 10^5$  cells/well were seeded in 96-well tissue-culture treated plates and grown in ImmunoCult Dendritic Cell Differentiation Medium (10985) for 5 days. On day 5, ImmunoCult Dendritic Cell Maturation Supplements (10989) were added into the immature dendritic cells for 2 days.

### **In vitro glucocorticoid treatment**

For cancer cell line (A549, C26, THP-1) experiments, cells were plated in 6 well plates, at a density of approximately 500,000 cells/well. For primary cell experiments, cells were plated in 96-well plates as described above. For suspension cells (monocyte-like THP-1 cells, primary monocytes, primary mature dendritic cells), cell-repellent plates were used to seed cells prior to dexamethasone treatment (Nunc or CellStar). Cells reached confluence on day one or day two after being seeded. For time course experiments, cells were seeded and harvested at the same time, with the only variable being the duration of treatment with 100nM dexamethasone (varied between 0 and 18 h), with 0-h treatment acting as the control. For single-timepoint experiments, cells were treated with either 100nM dexamethasone (Sigma) or 0.01% ethanol for 18 h prior to harvesting. For mature dendritic cell experiments, 10nM dexamethasone was used to minimize cytotoxicity.<sup>97</sup> For each experiment all samples were harvested concurrently.

For quantification of extracellular CyC, cell supernatant was collected at harvesting, spun at 10000 x g for 5 min to remove debris, and analyzed by ELISA (Human Cystatin C ELISA Kit, R&D Systems; Mouse Cystatin C ELISA Kit, Abcam/ab119590), with each sample profiled in duplicate. For quantification of cellular protein content, cells were washed with DPBS and ice-cold RIPA buffer with protease and phosphatase inhibitors (Thermo Fisher) or buffer APL (Qiagen) was added to each well. The cell lysate was passed through a 25G syringe for homogenization and spun for 10000 x g for 15 min, at 4°C. For RIPA lysates, protein content was determined by BCA assay (Thermo Fisher), with each sample profiled in duplicate. For APL lysates, samples were processed according to the AllPrep RNA/Protein Kit (Qiagen) manufacturer's protocol, with protein content determined by Nanodrop spectrophotometry. Normalized extracellular CyC concentrations were determined by dividing the ELISA-derived CyC concentration (ng/mL) by the cellular protein content (mg).

For quantitative real-time PCR (RT-PCR), RNA was extracted using the RNeasy Mini Kit (Qiagen) or the AllPrep RNA/Protein Kit (Qiagen) and reverse transcribed using SuperScript IV VILO Master Mix (Thermo Fisher) according to the manufacturer's protocol. Four housekeeping genes (GUSB, PPIA, RPL15, RPL19) with minimal variation on GC treatment were selected on the basis of a literature review<sup>98</sup> and differential expression analysis in ENCODE RNA-seq data (accession ENCSTR897XFT), implemented in edgeR. Primers were designed using NCBI Primer-BLAST, with exon-spanning primers designed where possible (primer sequences detailed in Table S5). PCR was performed using the PowerTrack SYBR Green Master Mix (Thermo Fisher) using the QuantStudio 6 Flex (Thermo Fisher) instrument, using a 10 $\mu$ L reaction volume in technical triplicate according to the manufacturer's protocol. The threshold cycle was determined by the Second Derivative Maximum method and the expression of each target was normalized relative to the geometric mean of endogenous controls.

### **In vivo glucocorticoid treatment**

Wild-type BALB/c and C57BL/6J were treated with a single high dose (20 mg/kg) of dexamethasone given intraperitoneally (IP) at 9a.m. Dexamethasone 21-phosphate disodium salt (Sigma) was dissolved in PBS and filter sterilized prior to injection. Tail vein samples were taken 24- and 48-h following IP dosing, and plasma levels of CyC were determined with Mouse Cystatin C ELISA Kit (ab119590), Abcam.

### **Glucocorticoid treatment in human subjects**

Glucocorticoid treatment in human cohort 1 has been reported previously.<sup>59</sup> Briefly, subjects were randomized to a 22-h treatment (commencing at 9a.m.) with placebo (intravenous 0.9% saline) or near-physiological glucocorticoid treatment with intravenous hydrocortisone. During the GC exposure, hydrocortisone was administered at a varying dose of 0.024 mg/kg/h between 9 a.m. and 12 p.m. (first day), 0.012 mg/kg/h between 12 p.m. and 8 p.m. (first day), 0.008 mg/kg/h between 8 p.m. and 12 a.m. (first day), and 0.030 mg/kg/h between 12 a.m. and 7 a.m. (second day). After 2 weeks, subjects were given whichever treatment they had not yet received, as part of a crossover study design. Blood samples were collected in the morning of the second intervention day (6 a.m.) and plasma was isolated. Plasma CyC and creatinine were measured using validated clinical assays (creatinine: Alinity c Creatinine (Enzymatic) Reagent Kit; CyC: Gentian Cystatin C Immunoassay) at the laboratory of Sahlgrenska University Hospital in Gothenburg, Sweden.

### **CyC quantification in patients with COVID-19**

For human cohort 2, serum samples were collected as specified timepoints (timepoint 1: within 72 h of admission/referred to as day 1, and timepoint 2: 7 days after timepoint 1).<sup>67</sup> ELISA-based serum cystatin C measurement was performed by Eve Technologies (Custom Human Kidney Injury Panel – Cystatin C). For human cohort 3, plasma sampling for plasma proteomics by mass spectrometry was performed three times per week subsequent to inclusion. Sample processing, mass spectrometry and data analysis were performed as described previously,<sup>2</sup> allowing for quantification of plasma CyC levels in 309 patients. Out of these patients, 131 had available paired serum creatinine for at least one timepoint, as well as clinical outcome data (COVID-specific mortality). For patients with at least one creatinine measurement, missing data were imputed with the most recent value. Plasma CyC levels were scaled by a factor of 300, so that the cohort mean was comparable to the mean serum CyC recorded in the UKB cohort (field 30720, units mg/L). For each patient, a creatinine-CyC (C2) ratio was calculated at each timepoint, using CKD-EPI eGFR equations with the race term set to 0.



### **In vivo model of cancer progression**

Experiments with the C26 model were performed using 8-weeks old wild-type BALB/c male mice. Mice were inoculated subcutaneously in their right flank with the syngeneic C26 colorectal cancer cell line ( $2 \times 10^6$  viable cells in  $100 \mu\text{L}$  RPMI vehicle) that induces cachexia. Prior to inoculation, C26 cells were dissociated with trypsin, followed by resuspension in FBS-free RPMI and counting of the viable cell concentration (trypan blue). C26-tumor bearing mice were termed pre-cachectic from 18 days post-inoculation and were defined as cachectic when their weight loss exceeded 15% from peak body weight. Plasma levels of CyC were determined with Mouse Cystatin C ELISA Kit (ab119590), Abcam. Corticosterone levels were quantified using Corticosterone ELISA (RE52211) from IBL International (TECAN).

### **Establishment of isogenic CyC<sup>-/-</sup> cell line**

We prioritized experimentation with the Mm1 (KPC-derived) cell line as we have found this line to behave highly reproducibly across different experimenters over time, allowing us to place greater confidence on the findings from each experiment. Mm1 were transiently transfected with CRISPR plasmids (PX459, GenScript) encoding either a guide RNA (gRNA) specific to a coding region in mouse *Cst3* or a non-targeting (scrambled) gRNA. We tested two *Cst3*-specific gRNAs and one scrambled gRNA from a pre-validated database.<sup>99</sup> Guide RNA sequences are summarized in Table S6. Mm1 cells were seeded into 24-well plates with 50,000 cells per well and after 24 h, they were transfected with 500ng plasmid using Lipofectamine 3000 (Thermo Fisher) according to the manufacturer's protocol. We included a GFP-expressing plasmid to assess transfection efficiency. After 48 h, the media was changed and replaced with DMEM media supplemented with  $5 \mu\text{g/ml}$  puromycin. After 72 h, the media was replaced with DMEM media for 24 h, followed by isolation of monoclonal populations by serial dilutions in a 96-well plate. To identify clones with CyC knockout, we measured CyC in the cell supernatant for each clone using the Mouse Cystatin C ELISA Kit (ab201280), Abcam. To verify the presence of truncating mutations in the *Cst3* coding region, we extracted genomic DNA from each clone (Qiagen DNeasy Blood and Tissue Kit) and performed targeted polymerase chain reaction (PCR) amplification and Sanger sequencing of the predicted gRNA binding sites. The editing efficiency was assessed using the Synthego ICE Analysis tool (<https://ice.synthego.com/>).

### **Characterization of isogenic CyC<sup>-/-</sup> cell line**

To compare the *in vitro* growth kinetics of isogenic sgScrambled and CyC<sup>-/-</sup> cell lines, cells were seeded into 6-well plates with 200,000 cell per well, with three biological replicates per clonal cell line. Each well was scanned every 2 h using an IncuCyte S3 Live Cell Analysis Instrument using the phase channel according to the manufacturer's protocol. Cell confluence was estimated using the IncuCyte Cell-By-Cell analysis module, and was normalized to the first timepoint. The doubling time was estimated by fitting a model of  $\log(\text{time})$  as a function of confluence. To compare the *in vivo* growth kinetics of isogenic sgScrambled and CyC<sup>-/-</sup> cell lines, mice were inoculated subcutaneously with 50,000–200,000 cells in the flank. For uni-flank experiments, mice were inoculated in the right flank; for biflank experiments, mice were inoculated in both left and right flanks, with the sgScrambled tumors on the left flank and the CyC<sup>-/-</sup> tumor on the right flank. For tumor inoculation, Mm1 cells were dissociated with trypsin followed by resuspension in FBS-containing DMEM, counting of the viable cell concentration (trypan blue) and resuspension in sterile PBS.  $10\text{--}20 \mu\text{L}$  of PBS-suspended cell mixture was combined with an equal volume of Cultrex Reduced Growth Factor Basement Membrane Extract (3433-010-01, R&D Systems) on ice. Immediately prior to inoculation, the suspended cell mixture is thawed to room temperature and loaded into insulin syringes (328440, BD). Mice were monitored regularly until palpable tumors formed, after which point the longest and shortest dimensions of each tumor was measured every 3–4 days using calipers. For anti-PD-L1 treatment, mice were treated with  $200 \mu\text{g}$  of anti-PD-L1 monoclonal antibody (BioXCell, BP010) every 3 days, given intraperitoneally (IP). Unless otherwise stated, mice were sacrificed by cervical dislocation once tumors exceeded 20mm on one axis.

### **Single-cell RNA sequencing of mouse tumors**

Tumors were finely minced at  $4^\circ\text{C}$  and transferred into tumor digestion medium containing collagenase/hyaluronidase and DNase I in RPMI 1640 with glutamine, then incubated on a shaker for 45 min at  $37^\circ\text{C}$  and 300rpm. Freed cells were collected by passing through the dissociated tumor and media into a  $70 \mu\text{m}$  cell strainer and quenching with FACS buffer (2% fetal bovine serum in sterile PBS) at  $4^\circ\text{C}$ . Cells were spun down at 300g for 5 min at  $4^\circ\text{C}$ , the pellet resuspended in ice-cold ammonium chloride solution for 5 min and quenched with FACS buffer. Cells were spun down again and resuspended in FACS buffer. Viable cells were quantified by trypan blue method and samples were then subject to dead cell removal (EasySep Dead Cell Removal Kit, STEMCELL). Prior to library preparation, viability and cell number were re-assessed with a Countess II FL using AOPI (PN- CS2-0106-5mL, Nexcelom Bioscience). Single-cell RNA-seq libraries targeting 8,000 cells per sample were generated using the Chromium Next GEM Single Cell 3' Reagent Kits v3.1 (PN-1000121, 10x Genomics) according to the manufacturer's instructions. Final libraries were sequenced to at least 25,000 reads per cell with the Illumina NextSeq 2000 and aligned with Cell Ranger (version 6.0.0, 10x Genomics) to the mm10 reference genome (refdata-gex-mm10-2020-A, 10x Genomics).

### **Tumor immunohistochemistry**

Tumors were harvested and embedded in tissue molds containing OCT (Sakura) and frozen on dry ice prior to storage at  $-80^\circ\text{C}$ . IHC staining were performed at CSHL Tissue Imaging Shared Facility. OCT embedded fresh tissue blocks were sectioned with Thermo #NX50 cryostat.  $10 \mu\text{m}$  thick sections were collected and mounted on positive charged glass slides (VWR superfrost plus micro slide)

IHC slides were stained on DISCOVERY ULTRA IHC/ISH research platform (Roche) following standard protocols. Briefly, after fixation, slides were incubated with primary antibody at 37°C for 1h and Discovery multimer detection system (Discovery OmniMap HRP, Discovery DAB, Roche) was used to detect and amplify immuno-signals. Primary antibodies: Ki67 (Thermo Fisher 14-5698-82), 1:500 dilution; Pan-CK (Novus Bio NBP1-48348H), 1:100 dilution; TREM2 (Proteintech 13483-1-AP), 1:150 dilution.

### Tumor *in situ* hybridization

Staining was performed using the RNAscope platform (ACD), according to the manufacturer's protocol for the RNAscope 2.5 HD Detection Reagent (red, 322360) and technical note for fresh-frozen tissue (320536). Tissue sections were fixed with 4% PFA for 15 min at 4°C, and dehydrated with a series of ethanol washes (50%, 70%, 100%, 100%) for 5 min each. The sections were pre-treated with hydrogen peroxide for 10 min, washed once with distilled water, pretreated with Protease IV for 30 min at RT and washed with 1X PBS. Sections were then individually hybridized for 2 h at 40°C, with probes targeting either TREM2 (404111, ACD), DapB (negative control; 310043, ACD) or PPIB (positive control; 313911, ACD). After hybridization, sections were washed twice with 1X PBS for 2 min and subject to 6 amplification steps (30 min at 40°C, 15 min at 40°C, 30 min at 40°C, 15 min at 40°C, 30 min RT, 15 min RT) prior to detection. Signal was detected using Fast Red reagent (322360, ACD) for 10 min at RT, and briefly washing with tap water prior to counterstaining with hematoxylin. Slides were mounted using xylene and EcoMount. Images were scanned using a Leica-Aperio Versa slide scanner.

## QUANTIFICATION AND STATISTICAL ANALYSIS

### Cohort genomic data quality control

#### UK Biobank

UK Biobank (UKB)-provided measured genotype, imputed genotype (GRCh37, imputed data release 3) and phenotype data<sup>100</sup> was accessed as part of application 58510. We selected subjects with available imputed genomic data (field 22028) and at least one paired creatinine (field 30700) and CyC measurement (field 30720), and excluded subjects with sex chromosome aneuploidy (field 22019), discordant genetic sex (fields 31 and 22001), excess heterozygosity and missing rate (field 22027). To classify genetic ancestry, we lifted over directly genotyped and linkage disequilibrium (LD)-pruned high-quality variants (biallelic SNPs, MAF >0.1%, call rate >99%) to GRCh38 and merged with variants available from an integrated callset (call rate >95%) derived from 1000 Genomes and Human Genome Diversity Project (HGDP, gnomAD). LD pruning was implemented using PLINK1.9 with parameters '-indep-pairwise 50 5 0.2'. Principal components (1–10) were computed using the unrelated reference subjects (PC-relate kinship coefficient <0.05) then projected onto all reference and UKB subjects. Next, a random forest classifier was trained using ancestry data from the reference cohort, implemented in the gnomAD package for Hail. This classifier was applied to the UKB subjects, and genetic ancestry was assigned with a minimum probability of 70% (Table S1). Relatedness data was extracted from the UKB-provided kinship matrix, generated using KING software. For the EUR ancestry group, subjects were split into a discovery cohort (n = 381,764 subjects) and validation cohort (n = 50,000 subjects), with the validation cohort comprising a random selection from unrelated UKB subjects (KING kinship coefficient <0.0442). For all other ancestry groups, all subjects were used as discovery cohort. For all analyses using imputed data, we filtered to variants with INFO score >0.8 and MAF >1% across whole cohort.

#### GTEX project

Whole-genome sequencing data (GRCh38) and controlled-access metadata (including time of death) was accessed through dbGaP (phs000424.v8.p2) as part of application 26811. The provided imputed data had already undergone extensive quality control, however, we removed an additional 9 subjects with a PC-relate kinship coefficient >0.05. We identified EUR ancestry subjects (n = 678) as above using 1000G/HGDP reference data to train a random forest classifier that was applied to genotype-tissue expression (GTEX) subjects, using high-quality LD-pruned common variants (biallelic SNPs, MAF >0.1%, call rate >99%,  $r^2 < 0.1$ ), LD pruning was implemented using the 'ld\_prune' function in Hail, subsequent to removal of high-LD regions.<sup>101</sup> In this smaller cohort, ancestry was defined using a minimum probability of 50% followed by removal of PCA outliers with a PCA Z score >5.

#### The Cancer Genome Atlas

Germline array data (Birdseed format, GRCh37) was downloaded from the GDC Legacy archive as part of dbGaP application 26811, before conversion to VCF format. For sample QC, we started with a sample list defined by Sayaman et al.,<sup>102</sup> which selected one germline sample per subject, prioritizing blood-derived or high call-rate samples, while removing samples with excess heterozygosity or hematological malignancies. For additional sample QC, we removed samples with discordant sex (using the impute\_sex function in Hail), excess hetero- or homo-zygosity (Z score >3, using agg.inbreeding function in Hail), related subjects (PC-relate kinship coefficient >0.05) and called genetic ancestry as described for the GTEX cohort (n = 7260 EUR patients). For imputation in the unrelated EUR population, we selected variants with call rate >95% and MAF >0.1%. Imputation was performed using the TOPMED server, which automatically lifts over variants to GRCh38. For the final cleaned dataset, we selected autosomal variants imputed with  $r^2 > 0.6$  and MAF >0.1%.

### STARNET

Stockholm Tartu Atherosclerosis Reverse Networks Engineering Task (STARNET) is a cohort of 600 Caucasian patients of Eastern European origin, with a confirmed diagnosis of coronary artery disease. Genomic data quality control has been described previously.<sup>52</sup> Briefly, array-based genotyping was performed on germline DNA from blood, followed by imputation against the 1000 Genomes phase 1 SNPs. Comparison of population structure with 1000 Genomes cohort confirmed that all STARNET subjects had European genetic ancestry.

### Immunotherapy meta-cohort

We requested access to 8 cohorts of patients treated with CPI (anti-PD-1, anti-PD-L1 and/or anti-CTLA4) with available germline exome sequencing and clinical outcome (Tables S2A and S2B). Clinical annotations were downloaded from the supplemental data from associated manuscripts or requested directly from principal investigators. Samples were excluded if there was insufficient data to report at least one outcome measure (overall survival, progression-free survival, durable clinical benefit). Durable clinical benefit (binary) was defined by patients with no radiological progression >6 months or overall survival >1 year. Harmonized germline short variant calling was implemented using nf-core/sarek pipeline, with Strelka mutation caller<sup>103</sup> and GRCh38 reference genome. gVCFs were merged using Illumina gvcfgenotyper tool and imported into Hail for processing. Samples with discordant sex (n = 13) were identified by comparison of sex reported in clinical metadata and genetic sex determined from integration of X chromosome heterozygosity and Y chromosome genotype counts (via PLINK 1.9 impute-sex function). For the small minority of patients without supplied sex (n = 4), sex was genetically imputed. For variant QC, calls filtered by Strelka were removed, SNPs calls required a minimum depth of 7 while indel calls required a minimum depth of 10. Each variant required a call rate >90% and at least one 'high-quality' call defined as one homozygous ALT call or one heterozygous ALT call (with allele balance >15% for SNP or >20% for indel). Samples with a call rate <90% or excess hetero- or homozygosity (Z score >3) were removed. No subjects had >third degree relatedness, which also excludes the possibility of duplicates samples in the cohort. EUR ancestry subjects were identified as for GTEx cohort. Imputation of EUR population was performed using the TOPMED server. For the final cleaned dataset, we selected autosomal variants imputed with  $r^2 > 0.6$  and MAF >0.1%.

### Computation of principal components

We computed 20 principal components (PCs) on all subjects (including related) and all genotyped variants, as per the BOLT-LMM manual, implemented in PLINK2 (–pca function). Due to computational complexity, the PLINK2 PCA approximation (–approx) was used for the EUR population. To account for genetic ancestry in downstream analyses, PCs (1–4) were computed on high-quality linkage disequilibrium (LD)-pruned variants (biallelic SNPs, MAF >0.1%, call rate >99%,  $r^2 < 0.1$ ), with SNPs in known high-LD regions removed.<sup>101</sup> For UKB, high-quality SNPs were derived from the 'in\_PCA' field from the UKB-provided SNP QC file. In the UKB cohort, PCs were computed with related subjects removed (approach described above), and then projected onto all remaining samples, using the 'run\_pca\_with\_relateds' function in the gnomAD package for Hail. In other cohorts (where related subjects were removed), PCs were computed using the 'hwe\_normalized\_pca' function in Hail.

### Genome-wide association analysis

eGFR-CyC and eGFR-Cr were calculated using CKD-EPI equations<sup>54</sup> implemented in the nephro package for R, with race term set to 0 for all subjects. For subjects we more than 1 paired creatinine and CyC measurement, we selected the earliest complete datapoint. Genome-wide association analyses (GWAS) in the discovery cohorts (for eGFR-CyC and eGFR-Cr were performed in each ancestry group, including related subjects, using BOLT-LMM<sup>9</sup> with covariates including age (field 21003), age,<sup>2</sup> sex (field 31), genotyping array (binarized from field 22000), recruitment center (field 54), and genetic PCs 1–20 (described above). LD score matrices for each ancestry group were downloaded from the Pan-UK Biobank project (<https://pan.ukbb.broadinstitute.org/>). To assess for confounding we determined the attenuation ratio of each trait via LD score regression, which was within the expected range for polygenic traits (Table S3).<sup>104</sup>

### Structural equation modeling

Structural equation modelling of eGFR-Cr and eGFR-Cy summary statistics was implemented in the Genomic-SEM package for R<sup>33</sup> and performed as per the GWAS-by-subtraction tutorial (<https://rpubs.com/MichelNivard/565885>). Briefly, for EUR, AFR and CSA populations, we performed LD score regression using LD matrices from the Pan-UK Biobank Project (<https://pan.ukbb.broadinstitute.org/>). We designed a structural equation model (summarized in Figure 1C), with latent traits estimated using the userGWAS function parallelized across each chromosome. Summary statistics for each latent trait (renal function, CyC-production) were extracted and effective sample sizes were estimated using the script provided by the Genomic-SEM authors (<https://github.com/GenomicSEM/GenomicSEM/wiki/5.-User-Specified-Models-with-SNP-Effects>). CyC-production summary statistics were standardized by setting A1 as the GRCh37 ALT allele and A2 as the GRCh37 REF allele, and multiplying the effect size of CyC-production by –1 so a higher effect size reflects increased CyC production.

### Processing of summary statistics

Clumping was performed in the EUR eGFR-CyC summary statistics, implemented in PLINK 1.9 with parameters `clump-r2 0.001`, `clump-p1 5e-8`, `clump-p2 5e-8` and `clump-kb 10000` using 1000 Genomes reference data (derived from European subjects). For each clump, the index SNP (SNP with lowest p value) was annotated using the OpenTargets Genetics (<https://genetics.opentargets.org/>) variant-to-gene pipeline,<sup>105</sup> which integrates both proximity and functional genomics data. For the small minority of variants ( $n = 2$ ) not represented in the OpenTargets database, the index SNP was annotated to the nearest coding gene. Partitioned heritability analysis was performed using the LDSC package for R<sup>106</sup> using the provided datasets, as per the tutorial by the package authors (<https://github.com/bulik/ldsc/wiki/Cell-type-specific-analyses>). For each trait and tissue-sample pair, we extracted the t-statistic as the ratio of the coefficient and standard error. To compare cell type-specific enrichment between renal function and CyC-production latent traits, we computed the absolute difference in t-statistic between eGFR-CyC and each latent trait, for each tissue sample. Colocalization analysis was performed using the `coloc` package for R,<sup>51</sup> using the single-variant assumption. Gene set enrichment analysis of CyC-production latent trait was performed using MAGMA,<sup>107</sup> implemented in the FUMA web server (<https://fuma.ctglab.nl/>) with a 0kb gene window. Mendelian randomization analysis, using *cis*-eQTLs probes for *CST3*, was implemented in GCTA-SMR<sup>108</sup> using SMR-formatted eQTL data from the eQTLGen Consortium.<sup>58</sup>

### Derivation and application of polygenic scores

CyC-production polygenic scores (PGS) were derived using LDpred2<sup>44</sup> (automatic model) according to the package vignette (<https://privetl.github.io/bigsnpr/articles/LDpred2.html>). For the genome-wide score, HapMap3 variants were intersected with high-quality genomic variants available for all of UKB (array), TCGA (array) and GTEX (WGS) cohorts ( $n = 1,031,527$ ). For the exome-wide score, HapMap3 variants were intersected with high-quality exonic variants from the panIO cohort ( $n = 352,549$ ). The provided UKB LD reference was used for PGS derivation. Model fitting was confirmed by visual inspection of chain convergence for each PGS. The PLINK2 linear scoring function (`-score`) was used to apply the PGS to each cohort and to avoid exclusion of duplicate dbSNP IDs, the source data was filtered to the PGS variants according to position and alleles. The sample-level PGS was normalized by Z-scoring in each cohort. To generate a patient-level surrogate for CyC production, we modeled eGFR-CyC as a function of eGFR-Cr and sex, with intercept set as 0. We computed the residual of this model, termed CyC-residual, which is multiplied by  $-1$  so that increasing CyC-residual reflects increased serum CyC relative to creatinine.

### Functional genomics

ChIP-seq (for GR/NR3C1, timeseries accession: ENCSR210PYP) and ATAC-seq (timeseries accession: ENCSR385LRX) data for A549 cells treated with dexamethasone was downloaded from the ENCODE data portal (<https://www.encodeproject.org/>). Data was processed using the ENCODE data analysis pipeline, generating a p value for each signal peak that reflects enrichment of DNA sequences. Data at the *CST3* locus was plotted using the `karyoploteR` package<sup>109</sup> for R. Enhancer activity scores ('ABC scores') derived from the validated activity-by-contact model,<sup>63</sup> applied to 131 biosamples, was downloaded from <ftp://ftp.broadinstitute.org/outgoing/liincRNA/ABC/Nasser2021-Full-ABC-Output/>. Scores for the distal enhancer element at the *CST3* locus reflecting analysis of data derived THP-1 cells were extracted, and data from THP-1 cells treated with PMA was compared to data from naive THP-1 cells.

### Gene expression profiling

For GTEX and ENCODE gene expression profiling, gene-level counts derived from STAR-aligned RNA sequencing (RNA-seq) reads were downloaded from the GTEX (<https://GTExportal.org/home/datasets>) and ENCODE (timeseries accession: ENCSR897XFT) data portals respectively. TMM and library size normalization were applied using the `edgeR` package<sup>110</sup> for R, generating TMM-normalized log-counts per million (CPM) expression values that can be compared between samples. For TCGA gene expression profiling, batch- and expression quantile-normalized data (RNA-seq) was downloaded from the PanCancer Atlas repository (<https://gdc.cancer.gov/about-data/publications/pancanatlas>). For STARNET gene expression profiling was performed as previously described<sup>109</sup> – briefly, gene counts were adjusted for GC content, library size and quantile-normalized implemented in `EDAseq`,<sup>111</sup> prior to log-transformation. For digital cytometry analysis implemented in `CIBERSORTx`<sup>70</sup> (for STARNET and GTEX cohorts), gene expression was normalized to gene length to generate transcripts per million (TPM) expression values. `CIBERSORTx` was run in absolute mode with LM22 reference set, 100 permutations and B-mode batch correction.

### eQTL analysis

Expression quantitative loci (eQTLs) were identified in the STARNET<sup>52</sup> cohort using the Kruskal Wallis test statistic (additive model), as implemented by the tool `kruX`,<sup>112</sup> using individual-level genotype and gene expression data (data processing described above). To identify associations between *CST3* and SNPs present at the *SERPINA6/SERPINA1* loci, we carried out this association analysis using 72 SNPs previously shown to be significantly associated with plasma cortisol.<sup>50</sup> This approach was applied to all non-vascular tissues ( $n = 5$ ) in the STARNET cohort (subcutaneous fat, visceral abdominal fat, skeletal muscle, liver, blood). As the 72 SNPs reflecting 4 independent LD blocks, we modeled this analysis as 20 (4 LD blocks, 5 tissues) independent hypotheses and so the Bonferroni-corrected significance threshold was 0.0025. For independent validation of the significant eQTL associations in GTEX, we performed Kruskal Wallis tests in two tissues (visceral adipose fat, liver) using the '`kruX.test`' function for R, using individual-level



genotype and gene expression data (data processing described above). For further characterization of significant eQTLs, we constructed a recessive linear model of *CST3* gene expression as a function of genotype (binarized to 0/1 versus 2), using the 'lm' function for R.

### scRNA-seq analysis

For analysis of single-cell RNA sequencing (scRNA-seq) profiles of human skin tumors, scRNA-seq expression matrices and metadata for Jerby-Anon et al.<sup>96</sup> and Yost et al.<sup>82</sup> were downloaded from Single Cell Portal (accession SCP109) and GEO (accession GSE123813), respectively. For analysis of scRNA-seq profiles of spleen and PBMCs, scRNA-seq expression matrices were downloaded from For Yost et al. the peritumoral T cell-specific samples were excluded from the analysis. Count or normalized expression data was imported into Seurat<sup>113</sup> (version 4.0), filtered (according to number of features, <10,000, and mitochondrial content, <7.5%, per cell), log-normalized (if applicable) and scaled. Highly variable features (n = 2000) were used for principal component analysis followed by clustering (Louvain algorithm). Immune clusters were annotated by comparison to reference PBMC data, implemented in clustifyR package for R.<sup>60</sup> Unannotated clusters (presumed to reflect one of tumor, cancer-associated fibroblast or endothelial cells) were manually annotated via established marker gene expression<sup>98</sup> and clonal copy number variation profiles, examined using the inferCNV<sup>114</sup> package for R. Patient-level pseudobulk cluster-specific expression data was extracted using the 'AverageExpression' function in Seurat.

For analysis of scRNA-seq profiles of murine Mm1 tumors, cellranger-processed data was imported into Seurat<sup>113</sup> (version 4.0). Quality control steps included removal of putative doublet cells (implemented in DoubletFinder<sup>115</sup>) and removal of cells with >20% mitochondrial genome-aligned reads or fewer than 200 features (UMIs). Data processing in Seurat included normalization, scaling (regressing out the effect of cell cycle genes), integration, Louvain clustering, dimensionality reduction and visualization. Each cluster was annotated as one of 14 cellular populations according to expression of validated marker genes (summarized in Table S7, and Figure S7A) Differential gene expression was identified from pseudobulk data, implemented in the Libra package for R.<sup>116</sup> Differentially enriched/depleted cell populations were identified by modeling logit-transformed cell proportions as a function of tumor genotype, implemented in the speckle package for R.<sup>76</sup>

To assess changes in the monocyte population following dexamethasone, we reanalyzed whole blood scRNA-Seq datasets from ICU-admitted COVID-19 patients treated with or without dexamethasone.<sup>67</sup> Initial data pre-processing and cell identity annotations were performed as described previously. Briefly, cell identity annotations were generated by mapping single-cell transcriptomes to the PBMC scRNA/CITE-seq multi-omic reference (Azimuth).<sup>113</sup> To identify a high-confidence TREM2+ monocyte population, we extracted cells annotated as CD14<sup>+</sup> monocytes and repeated batch effect correction (implemented using the 'FindIntegrationAnchors' function in Seurat), dimensionality reduction, and clustering. High-confidence Trem2+ monocytes were identified by expression of known TREM2+ monocyte markers (TREM2, APOE, CSF1R<sup>81,89</sup>), identified by gene-weighted density estimation implemented in the Nebulosa package for R.<sup>78</sup> Differentially enriched/depleted cell populations were identified as above.

### Cosinor regression

Cosinor regression for gene expression (*FKBP5*, *CST3*) as a function of time was performed using the cosinor package for R. A cosinor model has 4 parameters – MESOR (intercept), period (assumed as 24 h), amplitude and acrophase (timing of activity peak). The aim of this analysis is to estimate the amplitude of variation in gene expression of a 24-h cycle. Gene expression was derived from TMM-normalized TPM data (implemented in edgeR), to facilitate intra- and inter-sample comparisons. For UKB, time referred to time of sampling and for GTEX, time referred to time of death; both rounded to the nearest hour in 24-h clock. Amplitude coefficients were extracted from the transformed coefficients table.

### UKB cancer cohort

To identify patients who were treated with non-topical exogenous GCs, we reviewed field 20003 for coded medications bio-equivalent to dexamethasone or prednisolone. Subject lifespan was extracted from analysis of fields 40007 and 34. Parental lifespan was extracted from analysis of fields 2946, 1845, 1797, 1835, 1807 and 3526. Using cancer registry data (fields 40005, 40012, 40008, 40011), ICD10-coded cancer diagnoses were extracted and mapped to Phecodes (<https://phewascatalog.org/>). Using a curated list of operation codes (OPCS-4) reflecting curative procedures for 13 main tumor groups (Table S4), we mapped each cancer diagnosis to matched surgeries that occurred no more than 90 days prior to the coding entry. To account for variation in operation data availability prior to 2000, we filtered the data to cancers that were diagnosed after the year 2000. In cases where a patient was coded with a cancer of the same primary type more than once, the entries were merged. Patients with more than one discrete cancer diagnosis were excluded (n = 2435 subjects) due to the difficulty in defining the time since diagnosis. For recruited patients who had died, we manually reviewed details from the death certificate (field 40010) to identify descriptions that were consistent with cancer-specific mortality.

### Survival analyses

For Cox regression of overall and cancer-specific survival against CyC-residual, the time variable used was time from blood sampling to death or last follow-up date (nominally June 2020). For subjects with multiple CyC-residual datapoints over time, each datapoint was annotated with survival time relative to blood sampling and treated independently. Model covariates included age (at blood

sampling), sex, body mass index (BMI), hemoglobin, eGFR-Cr, C-reactive protein. For Cox regression of lifespan (for subject and parents) against CyC-production PGS in the UKB validation cohort, we used age at death or age at most recent follow-up as the time variable. Model covariates included year of birth (of subject, as parental birth years are not recorded) to account for historical increases in mean lifespan.

For Cox regression of cancer-specific survival against CyC-production PGS, it was necessary to consider bias from left truncation, where patients who died between diagnosis and the recruitment period would not be recruited. To account for this, the time interval used for Cox regression of overall and cancer-specific survival against CyC-production PGS in UKB referred to time from recruitment to death or data cut-off (June 2020). In contrast, TCGA patients were generally recruited close to the time of cancer diagnosis, prior to surgical resection of tumor and so time from diagnosis to death or last-follow-up date was used. Cancer-specific survival was extracted from the 'DSS' and 'DSS.time' fields in the TCGA clinical data resource available as part of the PanCancer Atlas (<https://gdc.cancer.gov/about-data/publications/pancanatlas>). Cancer-specific survival analyses with respect to CyC-production PGS were adjusted for age of diagnosis, genetic ancestry (PC1-4), sex (except sex-specific cancers), and a term reflecting whether curative surgery was performed. For UKB this term was derived from matching with curative operation codes as described above, for TCGA this term was derived from the field 'residual\_tumor' in the clinical data resource. UKB-specific PGS-cancer survival analyses were additionally adjusted for recruitment center (to account for regional heterogeneity in cancer outcomes) and genotyping array. Pan-cancer inverse variance-weighted meta-analysis in each cohort (UKB, TCGA) was implemented in the meta package for R<sup>64</sup> using both fixed and random effects models.

For phenome-wide time-to-event analysis in UKB, all UKB 'first occurrence' fields and cancer registry data (fields 40005 and 40006) were extracted, with ICD10 codes mapped to Phecodes. If multiple ICD10 codes mapped to a single Phecode, the earliest date of diagnosis was selected. For each time-to-event Phecode, the time variable was defined as time from birth to first occurrence of diagnosis or most recent follow-up date. To account for region-specific variability in health record linkage, this date was determined by either the most recent coded diagnosis or most recent UKB center visit. Each phenotype-specific Cox regression was adjusted for sex, genetic ancestry (PC1-4) and year of birth (to account for historical variation in disease risk).

### Digital pathology analyses

Digital image analysis of H + E stains as well as Trem2, panCK and Ki67 IHC were performed using HALO digital image analysis software version v3.4.2986.151 (Indica Labs, Corrales, NM, USA). All H&E scans were reviewed by two pathologists (DL and VHK), and the regions of viable respectively necrotic tissue was determined and computed. Necrotic tissue was excluded for further analysis. In order to analyze the tumor/stroma interaction, a deep neural network algorithm was trained on the panCK scans to recognize epithelial and non-epithelial compartments. Graphical overlays for both compartments simplified the quality control of the tissue classifier. The total area of the two compartments was then calculated automatically.

The 'Multiplex IHC v3.1.4' algorithm of HALO was implemented for analysis of Ki67 and Trem2 IHC. The nuclei and the chromogens were detected by color deconvolution with thresholds determined by internal controls. For Ki67 IHC, a proliferation index (Ki67+ cells/total cells) was calculated. For Trem2 IHC, the proportion of Trem2+ per unit tissue area was calculated, and the distance of each Trem2+ cell from the tumor border was measured using the proximity analysis tool of HALO.

### Statistical analysis

Significance testing refers to two-tailed unpaired t-tests with the assumption of unequal variance unless stated otherwise. For biflank tumor experiments, differences were assessed using two-tailed paired t-tests. For statistical and computational analyses, we used R (version 4.0.2) and Python (version 3.7.4) implemented as a Jupyter Notebook.



**Supplemental information**

**Cystatin C is glucocorticoid responsive,  
directs recruitment of Trem2+ macrophages,  
and predicts failure of cancer immunotherapy**

**Sam O. Kleeman, Tuba Mansoor Thakir, Breanna Demestichas, Nicholas Mourikis, Dominik Loiero, Miriam Ferrer, Sean Bankier, Yosef J.R.A. Riazat-Kesh, Hassal Lee, Dimitrios Chantzichristos, Claire Regan, Jonathan Preall, Sarthak Sinha, Nicole Rosin, Bryan Yipp, Luiz G.N. de Almeida, Jeff Biernaskie, Antoine Dufour, Pinkus Tober-Lau, Arno Ruusalepp, Johan L.M. Bjorkegren, Markus Ralser, Florian Kurth, Vadim Demichev, Todd Heywood, Qing Gao, Gudmundur Johannsson, Viktor H. Koelzer, Brian R. Walker, Hannah V. Meyer, and Tobias Janowitz**

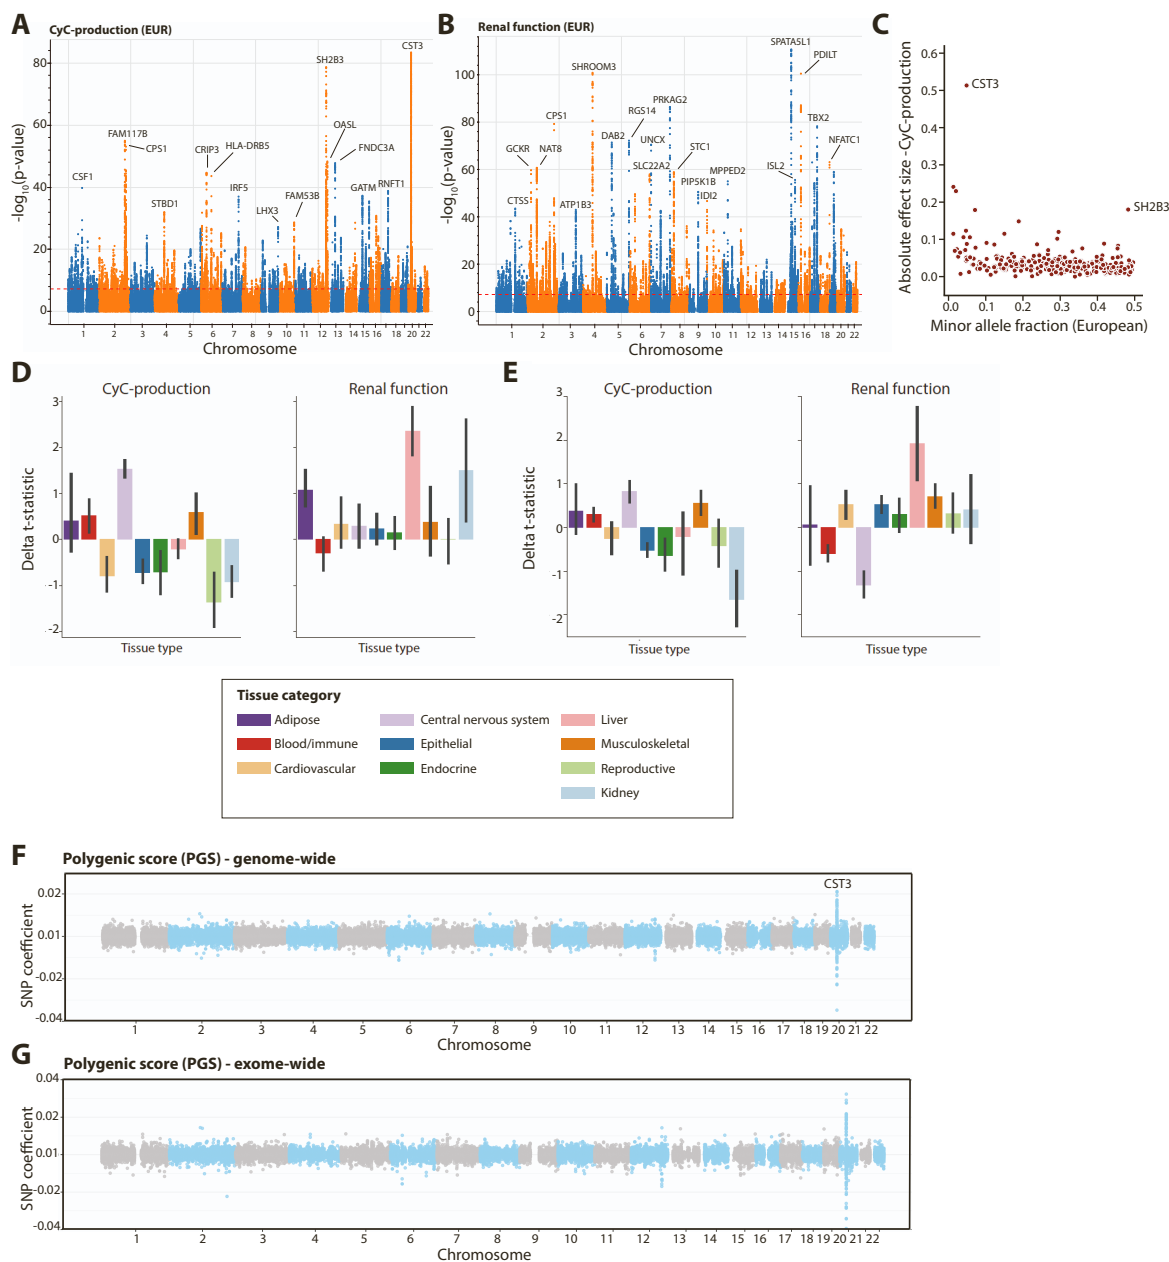

**Figure S1 – Derivation of CyC-production polygenic score (PGS), Related to Figure 1.** Summary statistics from (A) Cystatin C (CyC)-production and (B) Renal function latent traits in European UKB subjects, displayed a Manhattan plot. Loci with a p-value less than  $1e^{-30}$  are annotated with gene name from OpenTargets V2G pipeline. (C) Relationship between effect size and minor allele frequency in CyC-production trait, annotated with outlier loci. Partitioned heritability analysis across multiple tissue types derived from (D) gene expression and (E) chromatin accessibility data. Delta t-statistic refers to change in enrichment t-statistic between measured eGFR-CyC summary statistics and latent CyC-production or renal function statistics. Errors bars signify 95% confidence interval. Coefficients for each SNP included in polygenic scores (PGS) generated using (F) HapMap SNPs ( $n=1,000,000$ ) or (G) HapMap SNPs that can be reliably imputed from exome ( $n=300,000$ ) sequencing data. CST3 locus on chromosome 20 is annotated.

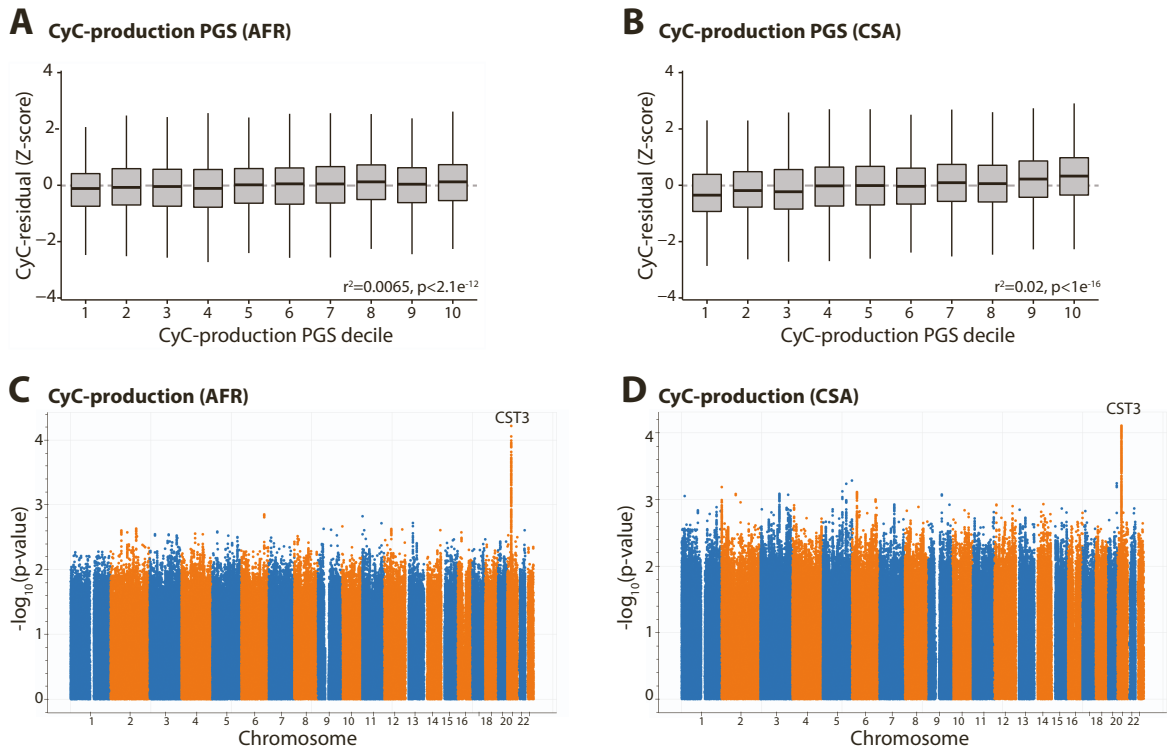

**Figure S2 – Trans-ancestral portability of CyC-production polygenic score (PGS), Related to Figure 1.** PGS derived in Biobank European training set ( $n=381,764$ ) applied to subjects of (A) African (AFR,  $n=8152$ ) and (B) Central and South Asian (CSA,  $n=9845$ ) genetic ancestry. Boxplots show median (central line) with interquartile range (IQR, box) and extrema (whiskers at  $1.5 \times$  IQR). Summary statistics from CyC-production latent trait in (C) AFR and (D) CSA genetic ancestry cohorts, derived from GWAS for eGFR-CyC and eGFR-creatinine followed by structural equation modeling. Results displayed as Manhattan plot; no loci reached genome-wide significance in latent trait analysis.

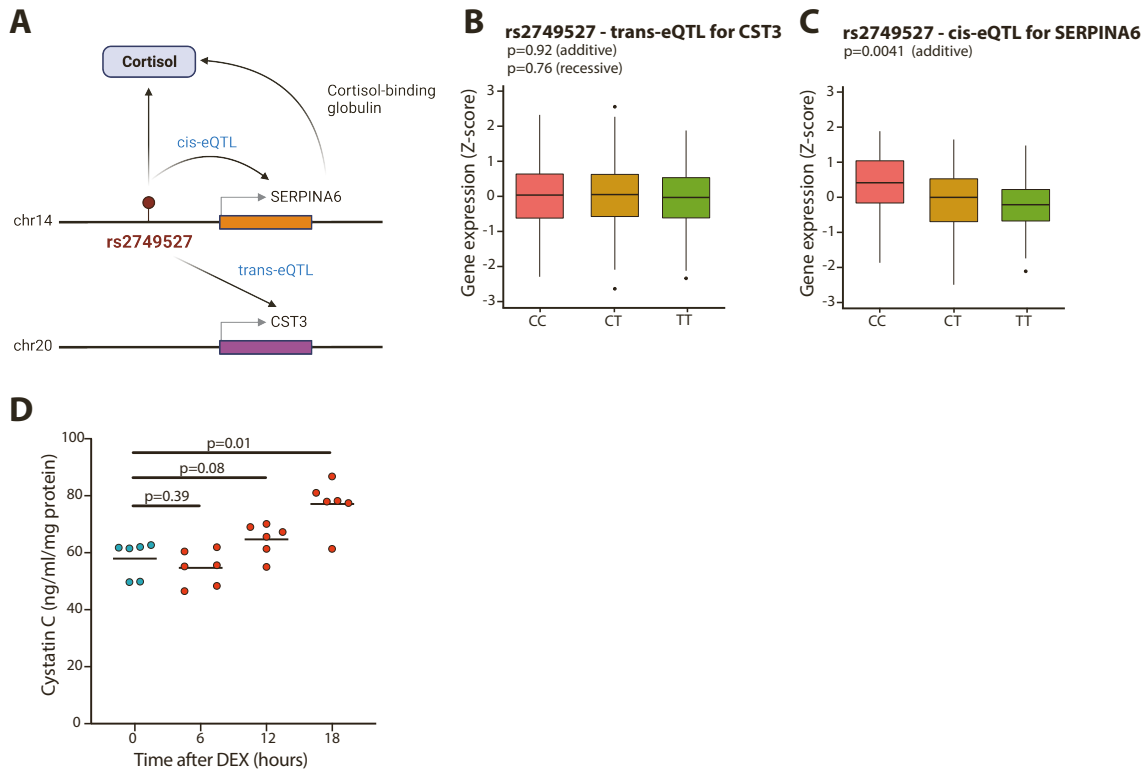

**Figure S3 – Supporting data for glucocorticoid-mediated regulation of cystatin C, Related to Figure 3.** (A) Role of single genetic instrument, *rs2749527*, as a trans-eQTL for *CST3* on chromosome 20 (in visceral adipose fat) and as a cis-eQTL for *SERPINA6* on chromosome 14 (in liver), which codes for cortisol-binding globulin, that is also significantly associated with morning plasma cortisol. Association analysis between *rs2749527* and both (B) *CST3* gene expression in visceral adipose fat (VAF, n=381) and (C) *SERPINA6* gene expression in liver (n=175) in GTEX cohort (EUR ancestry). The discordance between GTEX and STARNET data is discussed in the text and Figure S5a. P-values for additive and recessive models are shown. Boxplots show median (central line) with interquartile range (IQR, box) and extrema (whiskers at 1.5× IQR). Outliers beyond 1.5× IQR are shown as dots. (D) Extracellular cystatin C concentrations in A549 cells normalized to cellular protein content after 0-, 6-, 12- or 18-hour treatment with 100nM dexamethasone (DEX). Each timepoint comprises 6 biological replicates. P-values refer to two-sided t tests.

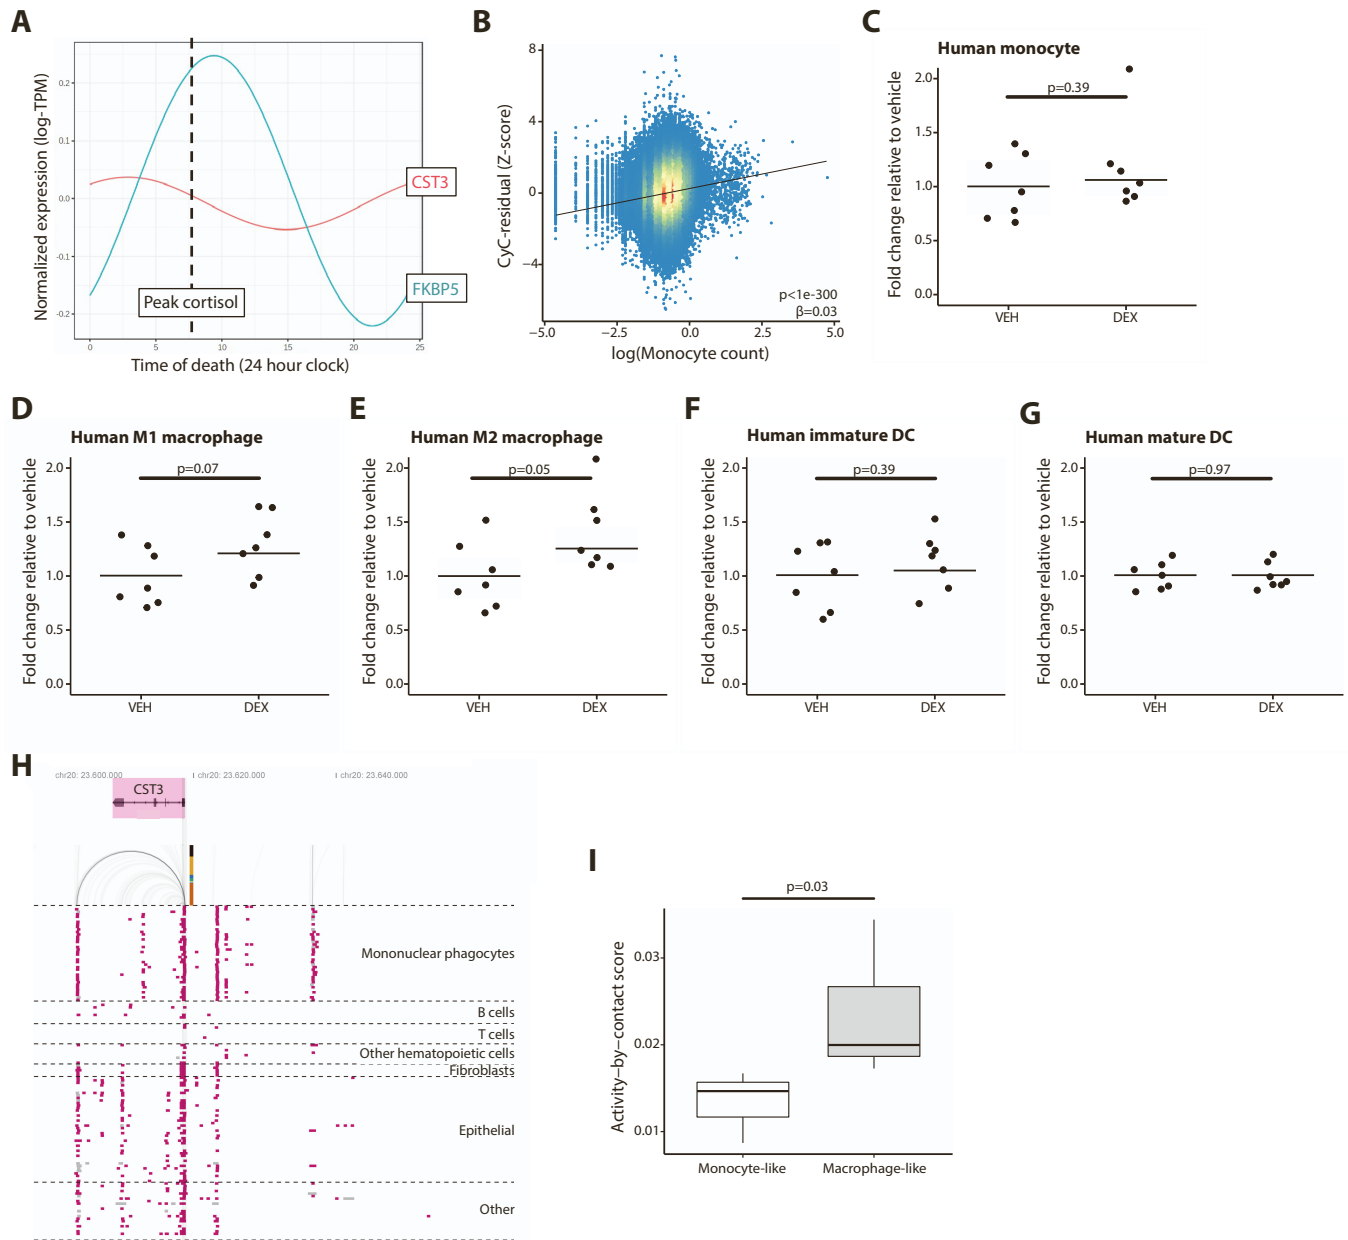

**Figure S4 – Supporting data for glucocorticoid-mediated regulation of cystatin C in myeloid cells, Related to Figure 4-5.** (A) Diurnal variation in *CST3* and *FKBP5* (canonical glucocorticoid response gene) derived from cosinor regression in GTEx spleen cohort, using time of death for each GTEx donor. (B) Significant positive correlation between logarithm of monocyte count and Z-score cystatin C (CyC)-residual in UKB cohort. Significance refers to multivariate regression including age, sex and body mass index (BMI). Fold change in extracellular CyC concentrations normalized to protein content in (C) primary human monocytes, as well as monocyte-derived (D) M1 and (E) M2 macrophages; (F) immature and (G) mature dendritic cells (DC) treated following 18-hour treatment with dexamethasone. All cell types were treated with 100nM dexamethasone (DEX) or vehicle control (VEH), except mature DCs which were treated with 10nM to minimize cytotoxicity. There are 7 biological replicates per group. (H) Visualization of predicted enhancer elements at *CST3* locus from activity-by-contact (ABC) model<sup>68</sup>, showing distal enhancer element acting on cystatin C. Each row corresponds to a cell line-treatment pair and epithelial grouping includes cancer cell lines. (i) ABC model scores for distal enhancer in THP-1 cells - with (macrophage-like) or without (monocyte-like) PMA treatment. P-values refer to two-sided t tests unless otherwise stated.



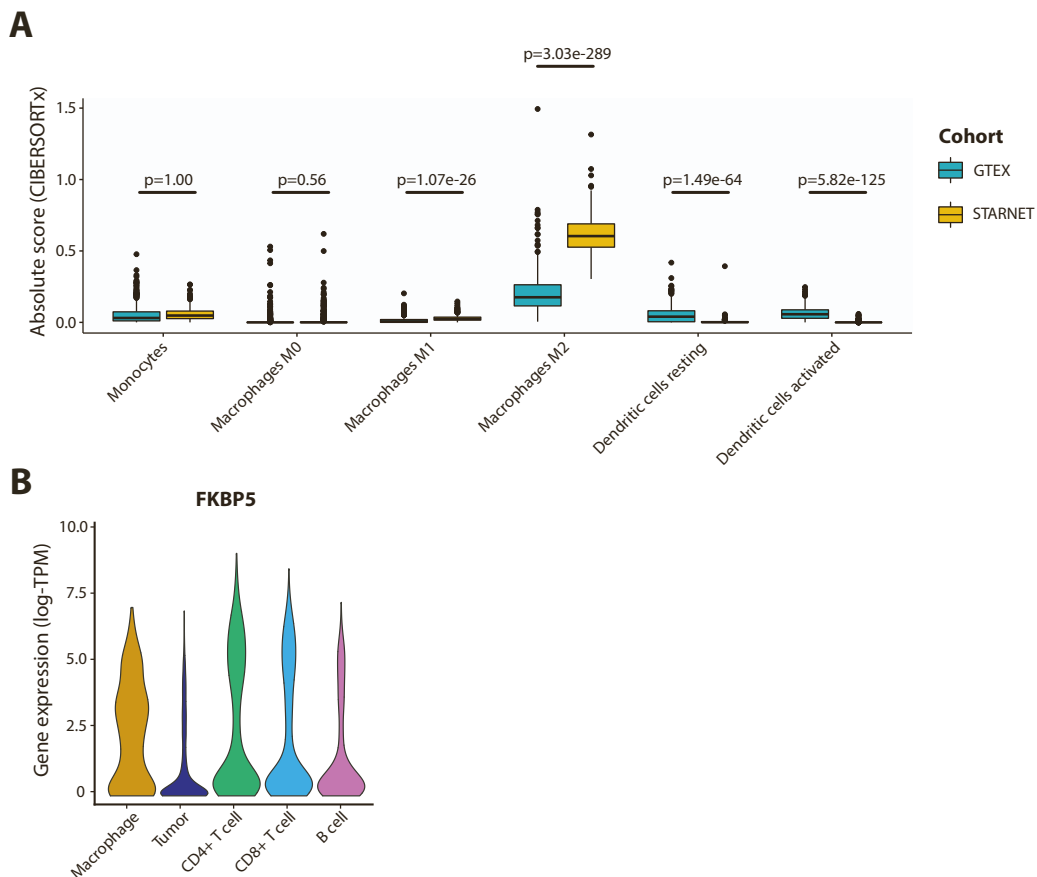

**Figure S5 – Supporting data for trans-eQTL analysis, Related to Figure 3.** (A) Inferred absolute myeloid cell composition from CIBERSORTx analysis (absolute mode) applied to visceral adipose tissue (VAF) from STARNET and GTEX cohorts. P values refer to t-tests with Bonferroni correction. While units are comparable between cell types and samples, they do not refer to an absolute cell fraction. Boxplots show median (central line) with interquartile range (IQR, box) and extrema (whiskers at  $1.5 \times$  IQR). Outliers beyond  $1.5 \times$  IQR are shown as dots. Marker genes used to define M0-like, M1-like (such as *CCL19*) and M2-like (such as *CCL18*) macrophages are described in the CIBERSORT manuscript<sup>100</sup>. (B) Single-cell *FKBP5* (canonical glucocorticoid receptor target) gene expression in each cell cluster in melanoma tumors (n=12) from Jerby-Anon et al<sup>101</sup>. Clusters defined by correlation to reference PBMC data<sup>98</sup>, with unclassified cells that exhibit detectable clonal copy number variation classified as tumor. P-values refer to two-sided t tests.

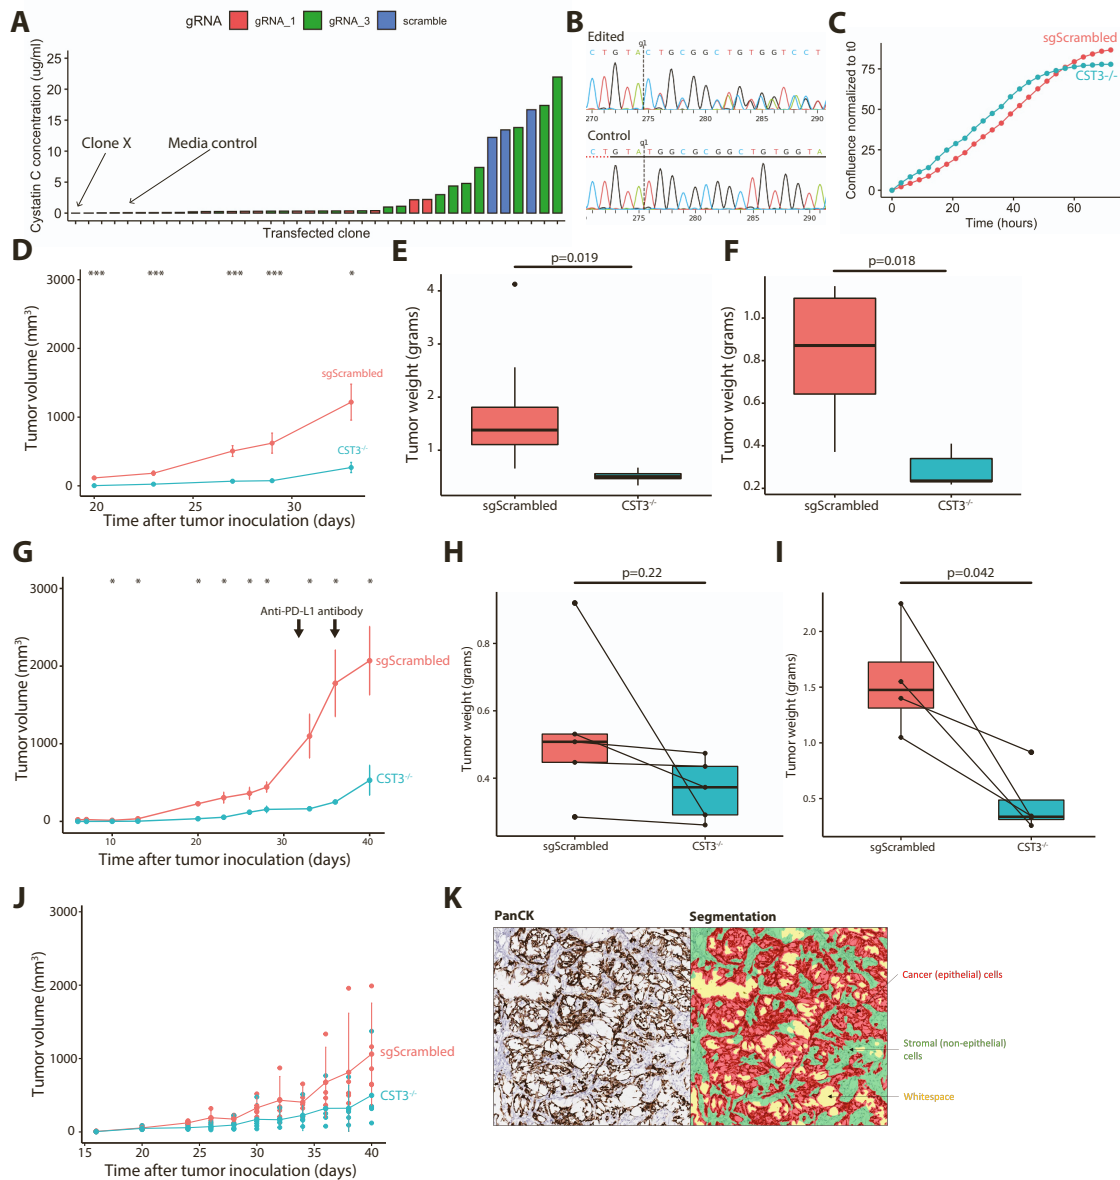

**Figure S6 – Supporting data for effects of cancer cell-specific cystatin C knockout *in vivo*, Related to Figure 6.** (A) Extracellular cystatin C (CyC) concentrations measured by ELISA in monoclonal cell populations derived from transfection of Mm1 cells with guide RNAs (gRNAs) specific to the *CST3* gene locus (gRNA\_1 and gRNA\_2, plus sgScrambled control). Clone X was selected on the basis of lowest extracellular CyC concentration. (B) Sanger sequencing trace showing high editing efficiency (>97%) at the predicted binding site for gRNA\_1 in clone X. (C) Cell confluence kinetics for sgScrambled and *CST3*<sup>-/-</sup> (clone X) cells normalized to confluence at the start of the experiment. (D) Tumor growth curves (mean and standard error of the mean) for an independent replication with single-flank sgScrambled (n=10) and *CST3*<sup>-/-</sup> (n=10) tumors, 200,000 cells inoculated in right flank (cohort B). Endpoint tumor weights for (E) cohort A and (F) cohort B. (G) Tumor growth curves (mean and standard error of the mean) for an independent replication bi-flank paired sgScrambled (n=4) and *CST3*<sup>-/-</sup> (n=4) tumors, 100,000 cells inoculated in both flanks (cohort D). Mice received two doses of anti-PD-L1 antibody. P-values refer to paired two-sided t tests. Endpoint tumor weights for (H) cohort C and (I) cohort D. P-values refer to paired two-sided t tests. (J) Tumor growth curves for single-flank sgScrambled (n=10) and *CST3*<sup>-/-</sup> (n=10) tumors, 200,000 cells inoculated in right flank of Rag1-null mice. Error bars reflect confidence intervals, which overlap for all timepoints. (K) Representative PanCK immunohistochemistry annotated with automated segmentation of epithelial and non-epithelial compartments. P-values refer to two-sided t tests unless otherwise stated.

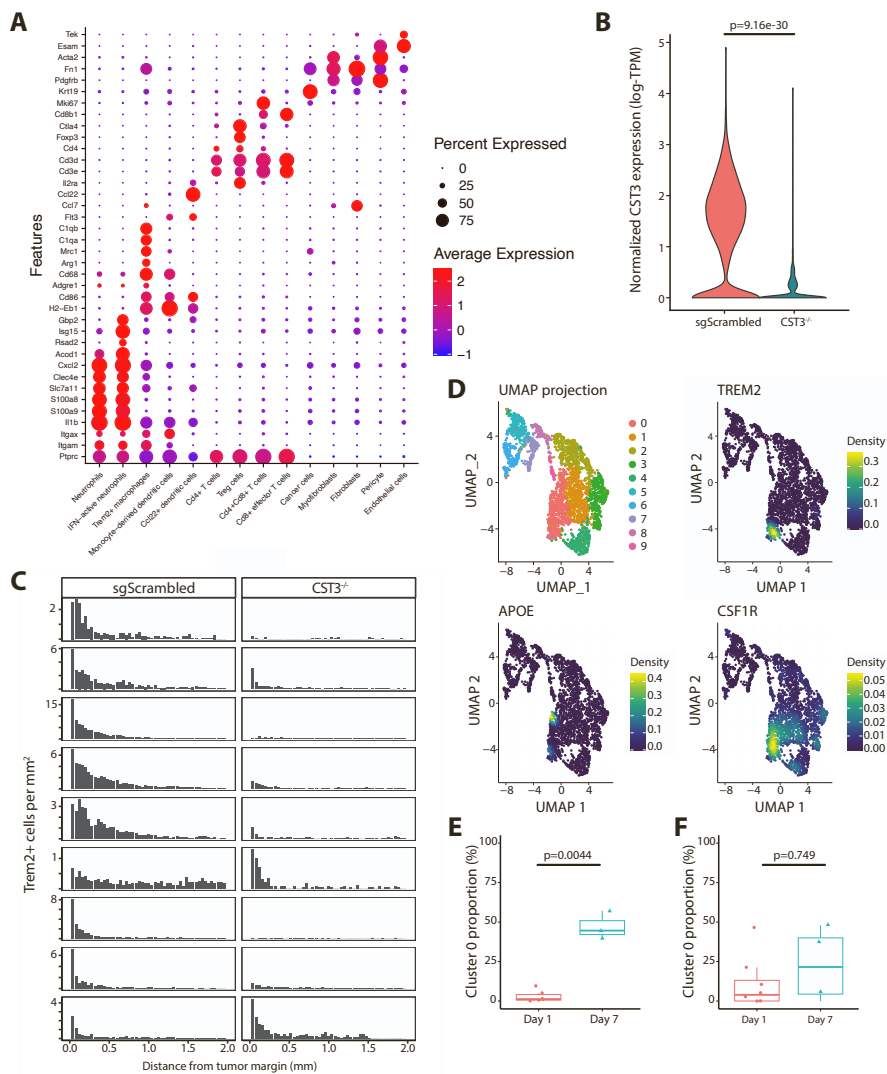

**Figure S7 – Supporting data for role of Trem2<sup>+</sup> cell population in phenotype of cystatin C-knockout tumors, Related to Figure 6.** (A) Dotplot of marker gene expression (marker selection detailed in Table S7) used to define cell cluster identity in scRNA-seq of Mm1 tumors. Dot color signifies mean expression (log-TPM) while dot size signifies the proportion of each cell population that have detectable expression of each gene. (B) Violin plot showing cancer cell compartment-specific *CST3* gene expression in sgScrambled and *CST3*<sup>-/-</sup> tumor samples. P-value refers to a pseudobulk comparison. (C) Histogram summarizing number of Trem2<sup>+</sup> cells per mm<sup>2</sup> in each 40μm window from the tumor margin in paired sgScrambled and *CST3*<sup>-/-</sup> tumor sections, each row corresponds to a mouse (n=9) with tumors inoculated in each flank. (D) UMAP plots of re-clustered CD14<sup>+</sup> monocytes (n=10 clusters) from ICU-admitted COVID-19 patients<sup>71</sup> annotated with the *Nebulosa*<sup>80</sup> kernel function (facilitating imputation of cluster gene expression) corresponding to TREM2, APOE and CSF1R gene expression; indicating that cluster 0 comprises detectable Trem2<sup>+</sup> monocytes. Proportion of cluster 0 monocytes at day 1 (within 72 hours of admission) and day 7 in ICU-admitted patients with COVID-19 who were treated (E) with or (F) without dexamethasone. P-value is adjusted p-value from linear model of logit-transformed proportions. P-values refer to two-sided t tests unless otherwise stated.

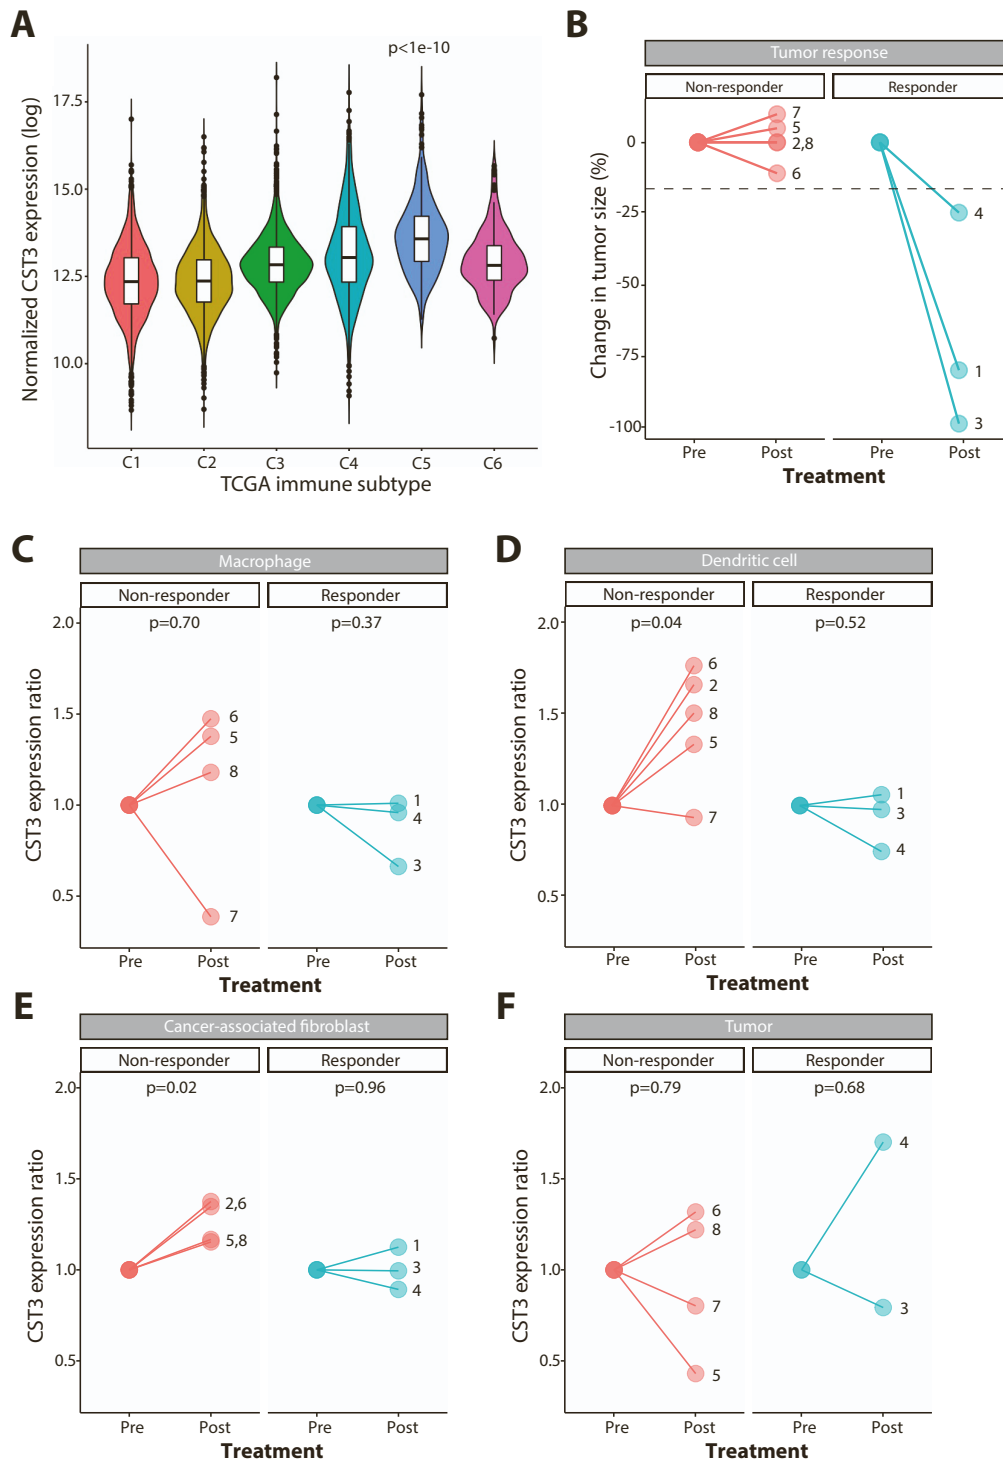

**Figure S8 – Role of cystatin C in dynamic resistance to immunotherapy treatment, Related to Figure 6.** (A) *CST3* gene expression (log-normalized) in each TCGA immune subtype (Thorsen et al<sup>102</sup>). Subtype 5 corresponds to ‘immunological quiet’ subtype, characterized by reduced lymphocyte and increased M2 macrophage responses. Significance level refers to one-way ANOVA with post-hoc Tukey’s test. (B) Summary of radiological response data for patients with basal cell carcinoma (BCC, n=8) derived from Yost et al<sup>103</sup>. Response is nominally defined as tumor regression >25%. Numbers refer to patient IDs. Ratio of cluster-specific pseudo-bulk *CST3* gene expression (log-TPM) in paired biopsy samples pre/post anti-PD-1 treatment, segregated according to clinical response, for (C) macrophage, (D) dendritic cell, (E) cancer-associated fibroblast (CAF) and (F) tumor subsets. Uncorrected P values refer paired t-tests.

**Table S1:** Ancestry classification in UK Biobank, related to STAR Methods.

| <b>Ancestry code</b> | <b>Ancestry name</b>    | <b>Number of subjects</b> |
|----------------------|-------------------------|---------------------------|
| EUR                  | European                | 456606                    |
| CSA                  | Central and South Asian | 9845                      |
| AFR                  | African                 | 8154                      |
| EAS                  | East Asian              | 2500                      |
| MID                  | Middle Eastern          | 843                       |
| AMR                  | Admixed American        | 707                       |



**Table S2:** Summary statistics for panIO cohort, related to STAR Methods.

**Table S2a:** Summary of cohorts comprising pan-immunotherapy (panIO) cohort.

| Accession   | Cohort size (after QC) | Controlled ad | Data source | Marker papers (Pubmed ID) | Tumor type                  | Tumor status | Treatment                            |
|-------------|------------------------|---------------|-------------|---------------------------|-----------------------------|--------------|--------------------------------------|
| imvigor210  | 205                    | Yes           | EGA         | 29443960                  | Urothelial                  | Metastatic   | Atezolizumab                         |
| phs000452   | 230                    | Yes           | dbGaP       | 26359337, 31792460        | Melanoma                    | Metastatic   | Pembrolizumab, Nivolumab, Ipilimumab |
| phs001493   | 60                     | Yes           | dbGaP       | 29301960                  | ccRCC                       | Metastatic   | Nivolumab                            |
| phs000980   | 18                     | Yes           | dbGaP       | 25765070                  | NSCLC                       | Metastatic   | Pembrolizumab                        |
| phs001041   | 51                     | Yes           | dbGaP       | 25409260                  | Melanoma                    | Metastatic   | Ipilimumab                           |
| PRJNA312948 | 26                     | No            | SRA         | 26997480                  | Melanoma                    | Metastatic   | Pembrolizumab, Nivolumab             |
| PRJNA356761 | 61                     | No            | SRA         | 29033130                  | Melanoma                    | Metastatic   | Nivolumab                            |
| phs001565   | 34                     | Yes           | dbGaP       | 30150660                  | Urothelial, Melanoma, HNSCC | Metastatic   | Various                              |

**Table S2:** Summary statistics for panIO cohort, related to STAR Methods.

**Table S2b:** Summary of patient demographics in pan-immunotherapy (panIO) cohort. For details on the individual cancer immunotherapy trial cohorts making up this data see Table S1.

| Baseline characteristics                     | Subset                                        | Statistic |
|----------------------------------------------|-----------------------------------------------|-----------|
| <i>Age, years</i>                            | Median                                        | 61        |
|                                              | Range                                         | 18-89     |
| <i>Gender, n (%)</i>                         | Female                                        | 214 (31)  |
|                                              | Male                                          | 471 (69)  |
| <i>Tumor type, n (%)</i>                     | Melanoma                                      | 373 (54)  |
|                                              | Urothelial                                    | 221 (32)  |
|                                              | Renal cell carcinoma (RCC)                    | 60 (9)    |
|                                              | Non-small-cell lung cancer (NSCLC)            | 19 (3)    |
|                                              | Head and neck squamous cell carcinoma (HNSCC) | 12 (2)    |
| <i>Treatment, n (%)</i>                      | Anti-PD-1                                     | 320 (47)  |
|                                              | Anti-PD-L1                                    | 207 (30)  |
|                                              | Anti-CTLA-4                                   | 145 (21)  |
|                                              | Combined PD-1/PD-L1 and CTLA-4                | 13 (2)    |
| <i>Best overall response (RECIST), n (%)</i> | Complete response (CR)                        | 47 (7)    |
|                                              | Partial response (PR)                         | 128 (19)  |
|                                              | Stable disease (SD)                           | 125 (18)  |
|                                              | Progressive disease (PD)                      | 301 (44)  |
|                                              | Unavailable                                   | 84 (12)   |
| <i>Durable clinical benefit, n (%)</i>       | Yes                                           | 285 (42)  |
|                                              | No                                            | 385 (56)  |
|                                              | Unavailable                                   | 15 (2)    |

**Table S3:** Genome-wide association analysis quality control statistics, related to STAR Methods.

| Analysis               | Population | Lambda-GC | Attenuation ratio |
|------------------------|------------|-----------|-------------------|
| <i>eGFR-Creatinine</i> | EUR        | 1.76      | 0.12              |
|                        | AFR        | 1.04      | 0.67              |
|                        | CSA        | 1.03      | 0.31              |
| <i>eGFR-CyC</i>        | EUR        | 2         | 0.1               |
|                        | AFR        | 1.04      | 0.52              |
|                        | CSA        | 1.04      | 0.31              |

**Table S5:** Primer sequences for RT-qPCR, related to STAR Methods.

| Gene  | Forward                | Reverse               |
|-------|------------------------|-----------------------|
| CST3  | GCCACATCTGAAAAGGAAAGCA | GCGTCCTGACAGGTGGATTT  |
| PPIA  | GCCACCGCCGAGGAAAA      | CGACGGCAATGTCGAAGAAC  |
| GUSB  | TGCGTAGGGACAAGAACCAC   | TGTGAGCGATCACCATCTTCA |
| RPL19 | ACATGGGCATAGGTAAGCGG   | CCGGCGCAAATCCTCATTC   |
| RPL15 | CTACAAGGCCAAGCAAGGTTAC | GGACAGGCTTGCCGTAAGTT  |

**Table S6:** Guide RNA (gRNA) sequences for CRISPR-knockout, related to STAR Methods.

| <b>Guide</b>                | <b>Sequence</b>      |
|-----------------------------|----------------------|
| Non-targeting (sgScrambled) | GCGAGGTATTCGGCTCCGCG |
| CST3_1                      | GTACCACAGCCGCGCCATAC |
| CST3_2                      | AAAACAAGGCCCGCAATGT  |



**Table S7:** Summary of marker genes (positive and negative) used for scRNA-seq cell type identification, related to STAR Methods.

| Cell population                  | Positive markers                                                                                       | Negative markers |
|----------------------------------|--------------------------------------------------------------------------------------------------------|------------------|
| Neutrophils                      | CD45; Cd11b; Cd11c; Il-1B; S100a9; S100a8; Slc7a11; Clec4e; Cxcl2; Acod1                               |                  |
| IFN-activated neutrophils        | CD45; Cd11b; Cd11c; Il-1B; S100a9; S100a8; Slc7a11; Clec4e; Cxcl2; Acod1; viperin(rsad2); Isg15; Gbp2; |                  |
| Trem2+ macrophages               | CD45; Cd11b; Cd11c; Il-1B; H2-Eb1; CD86; Slc7A11; Adgre1; Clec4e; Cxcl2; CD68; Arg1; CD206; C1qa; C1qb |                  |
| Monocyte-derived dendritic cells | CD45; Cd11b; Cd11c; Il-1B; H2-Eb1; CD86; Flt3; CD68                                                    |                  |
| Ccl22+ dendritic cells           | CD45; Il-1B; H2-Eb1; CD86; Slc7A11; CCL7; CCL22; Flt3; CD25                                            | CD11b; CD11c     |
| CD4 T cells                      | CD45; CD3e; CD3d; CD4                                                                                  | CD8; Foxp3       |
| T regulatory cells               | CD45; CD3e; CD3d; CD4; Foxp3; CTLA4                                                                    |                  |
| CD4+ CD8+ T cells                | CD45; CD3e; CD3d; CD4; CD8b1; Mki67; CTLA4; CD25                                                       |                  |
| CD8+ Effector T cells            | CD45; CD3e; CD3d; CD8b1                                                                                | CD4              |
| Cancer cells                     | Mki67; Krt19                                                                                           | CD45             |
| Myofibroblasts                   | Pdgfrb; Fn1; Acta2; Esam                                                                               | CD45             |
| Pericytes                        | Pdgfrb; Acta2; Fn1                                                                                     | CD45             |
| Fibroblasts                      | Pdgfrb; Fn1                                                                                            | CD45             |
| Endothelial Cells                | Esam; Tek                                                                                              | CD45             |
